# Supplementary material
Source: MDPI journal article supplement (https://www.mdpi.com/2304-6740/12/2/46)
Supplement: s1 [file s1]

# Investigations of the Influence of Two Pyridyl-Mesoionic Carbene Constitutional Isomers on the Electrochemical and Spectroelectrochemical Properties of Group 6 Metal Carbonyl Complexes

Tobias Bens<sup>1,2</sup> and Biprajit Sarkar<sup>1,2,\*</sup>

<sup>1</sup> Institut für Anorganische Chemie, Universität Stuttgart, Pfaffenwaldring 55, 70569, Stuttgart, Germany; tobias.bens@uibk.ac.at

<sup>2</sup> Institut für Chemie und Biochemie, Freie Universität Berlin, Fabeckstraße 34–36, 14195, Berlin, Germany

\* Correspondence: biprajit.sarkar@iac.uni-stuttgart.de

**Keywords:** mesoionic carbenes; (spectro)electrochemistry; carbonyl ligands; group 6 carbonyls; EPR spectroscopy

|                                                                                                                                  |    |
|----------------------------------------------------------------------------------------------------------------------------------|----|
| <b>S1. Experimental Section</b>                                                                                                  | 4  |
| S1.10 General Procedures, Materials and Instrumentation                                                                          | 4  |
| S1.30 Electrochemistry                                                                                                           | 5  |
| S1.40 Spectroelectrochemistry                                                                                                    | 5  |
| S1.50 DFT                                                                                                                        | 6  |
| <b>S2. Cyclic Voltammetry</b>                                                                                                    | 8  |
| S2.10 Cyclic Voltammetry of $[\text{Cr}(\text{C}-\text{C})(\text{CO})_4]$                                                        | 8  |
| S2.20 Cyclic Voltammetry of $[\text{Cr}(\text{C}-\text{N})(\text{CO})_4]$                                                        | 9  |
| S2.30 Cyclic Voltammetry of $[\text{Mo}(\text{C}-\text{C})(\text{CO})_4]$                                                        | 10 |
| S2.40 Cyclic Voltammetry of $[\text{Mo}(\text{C}-\text{N})(\text{CO})_4]$                                                        | 12 |
| S2.50 Cyclic Voltammetry of $[\text{W}(\text{C}-\text{C})(\text{CO})_4]$                                                         | 12 |
| S2.60 Cyclic Voltammetry of $[\text{W}(\text{C}-\text{N})(\text{CO})_4]$                                                         | 13 |
| <b>S3. Spin Density Calculations</b>                                                                                             | 14 |
| <b>S4. IR-Spectroelectrochemistry and DFT Calculations</b>                                                                       | 14 |
| S4.10 IR-Spectroelectrochemistry of $[\text{Cr}(\text{C}-\text{C})(\text{CO})_4]$                                                | 14 |
| S4.11 Calculated IR Spectra of $[\text{Cr}(\text{C}-\text{C})(\text{CO})_4]$ and $[\text{Cr}(\text{C}-\text{C})(\text{CO})_4]^-$ | 16 |
| S4.20 IR-Spectroelectrochemistry of $[\text{Mo}(\text{C}-\text{C})(\text{CO})_4]$                                                | 17 |
| S4.21 Calculated IR Spectra of $[\text{Mo}(\text{C}-\text{C})(\text{CO})_4]$ and $[\text{Mo}(\text{C}-\text{C})(\text{CO})_4]^-$ | 18 |
| S4.30 IR-Spectroelectrochemistry of $[\text{W}(\text{C}-\text{C})(\text{CO})_4]$                                                 | 19 |
| S4.31 Calculated IR Spectra of $[\text{W}(\text{C}-\text{C})(\text{CO})_4]$ and $[\text{W}(\text{C}-\text{C})(\text{CO})_4]^-$   | 20 |
| S4.40 IR-Spectroelectrochemistry of $[\text{W}(\text{C}-\text{N})(\text{CO})_4]$                                                 | 21 |
| S4.41 Calculated IR Spectra of $[\text{W}(\text{C}-\text{N})(\text{CO})_4]$ and $[\text{W}(\text{C}-\text{N})(\text{CO})_4]^-$   | 22 |
| <b>S5. UV/vis/NIR-Spectroelectrochemistry</b>                                                                                    | 23 |
| S5.10 UV/vis/NIR-Spectroelectrochemistry of $[\text{Cr}(\text{C}-\text{C})(\text{CO})_4]$                                        | 23 |
| S5.20 UV/vis/NIR-Spectroelectrochemistry of $[\text{Mo}(\text{C}-\text{C})]$                                                     | 23 |
| S5.30 UV/vis/NIR-Spectroelectrochemistry of $[\text{W}(\text{C}-\text{C})(\text{CO})_4]$                                         | 24 |
| S5.40 UV/vis/NIR-Spectroelectrochemistry of $[\text{W}(\text{C}-\text{N})(\text{CO})_4]$                                         | 24 |
| <b>S6. TD-DFT Calculations</b>                                                                                                   | 25 |
| S6.10 TD-DFT Calculations of $[\text{Cr}(\text{C}-\text{C})(\text{CO})_4]^-$                                                     | 25 |
| S6.20 TD-DFT Calculations of $[\text{Mo}(\text{C}-\text{C})(\text{CO})_4]$ and $[\text{Mo}(\text{C}-\text{C})(\text{CO})_4]^-$   | 30 |
| S6.30 TD-DFT Calculations of $[\text{W}(\text{C}-\text{C})(\text{CO})_4]$ and $[\text{W}(\text{C}-\text{C})(\text{CO})_4]^-$     | 39 |

|                                                                                                                |    |
|----------------------------------------------------------------------------------------------------------------|----|
| S6.40 TD-DFT Calculations of $[\text{W}(\text{C-N})(\text{CO})_4]$ and $[\text{W}(\text{C-N})(\text{CO})_4]^-$ | 49 |
| <b>S7. Electrochemical <math>\text{CO}_2</math> Reduction</b>                                                  | 58 |
| S7.10 Electrochemical $\text{CO}_2$ Reduction with $[\text{Cr}(\text{C-C})(\text{CO})_4]$                      | 58 |
| S7.20 Electrochemical $\text{CO}_2$ Reduction with $[\text{Cr}(\text{C-N})(\text{CO})_4]$                      | 59 |
| S7.30 Electrochemical $\text{CO}_2$ Reduction with $[\text{Mo}(\text{C-C})(\text{CO})_4]$                      | 60 |
| S7.40 Electrochemical $\text{CO}_2$ Reduction with $[\text{Mo}(\text{C-N})(\text{CO})_4]$                      | 61 |

## S1. Experimental Section

### S1.10 General Procedures, Materials and Instrumentation

*Caution!* Compounds containing azides are potentially explosive. Although we never experienced any problems during synthesis or analysis, all compounds should be synthesized only in small quantities and handled with great care!

Unless otherwise noted, all reactions were carried out using standard Schlenk-line-techniques under an inert atmosphere of argon (Linde Argon 4.8, purity 99.998%) or in a glovebox (Glovebox Systemtechnik, GS095218).

Commercially available chemicals were used without further purification. The solvents used for metal complex synthesis and catalysis were available from MBRAUN MB-SPS-800 solvent System and degassed by standard techniques prior to use. The identity and purity of compounds were established *via*  $^1\text{H}$  and  $^{13}\text{C}$  NMR spectroscopy, elemental analysis and mass spectrometry.

Solvents for cyclic voltammetry and UV/vis- and EPR-spectroelectrochemical measurements were dried and distilled under argon and degassed by common techniques prior to use. Column chromatography was performed over silica 60 M (0.04 – 0.063 mm).

$^1\text{H}$  and  $^{13}\text{C}\{^1\text{H}\}$  NMR spectra were recorded on a Bruker Avance 400 spectrometer at 19 – 22 °C. Chemical shifts are reported in ppm referenced to the residual solvent peaks.<sup>[1]</sup>

The following abbreviations are used to represent the multiplicity of the signals: s (singlet), d (doublet), t (triplet), q (quartet), p (pentet), sept (septet).

Mass spectrometry was performed on an Agilent 6210 ESI-TOF.

Elemental analyses were performed with an Elementar Micro Cube elemental analyser.



The light-induced syntheses were performed with a LOT-QuantumDesign Arc Lamp (150 W, Xe OF).

[1] S. Budavari (Ed.) *The Merck-index. An encyclopedia of chemicals, drugs, and biologicals*, Rahway, NJ, 1991.

### S1.30 Electrochemistry

Cyclic voltammograms were recorded with a PalmSens4 potentiostat or PAR VersaStat (Ametek), respectively, with a conventional three-electrode configuration consisting of a glassy carbon working electrode or gold working electrode, a platinum auxiliary electrode, and a coiled silver wire as a pseudo reference electrode. The (decamethyl)ferrocene/(decamethyl)ferrocenium couple was used as internal reference. All measurements were performed at room temperature with a scan rate between 25 and 1000 mVs<sup>-1</sup>. The experiments were carried out in absolute Acetonitrile containing 0.1 M Bu<sub>4</sub>NPF<sub>6</sub> (Sigma Aldrich, ≥ 99.0%, electrochemical grade) as the supporting electrolyte.

### S1.40 Spectroelectrochemistry

UV/vis spectra were recorded with a Avantes spectrometer consisting of a light source (AvaLight-DH-S-Bal), a UV/vis detector (AvaSpec-ULS2048), and an NIR detector (AvaSpec-NIR256-TEC). IR spectra were recorded with a BRUKER Vertex 70 FT-IR or Nicolet 6700 FT-IR spectrometer, respectively. UV/vis-spectroelectrochemical measurements were carried out in an optically transparent thin-layer electrochemical (OTTLE)<sup>[2]</sup> cell (CaF<sub>2</sub> windows) with a gold-mesh working electrode, a platinum-mesh counter electrode, and a silver-foil pseudo reference. EPR spectra at the X-band frequency (ca. 9.5 GHz) were obtained with a Magnettech MS-5000 benchtop EPR spectrometer equipped with a rectangular TE 102 cavity and a TC HO4 temperature controller. The measurements were carried out in synthetic quartz glass tubes. For EPR spectroelectrochemistry, a three-electrode setup was employed using two Teflon-coated platinum wires (0.005 in. bare and 0.008 in. coated) as the working and counter

electrodes and a Teflon-coated silver wire (0.005 in. bare and 0.007 in coated) as the pseudo reference electrode. The experiments were carried out in absolute Acetonitrile containing 0.1 M Bu<sub>4</sub>NPF<sub>6</sub> as the supporting electrolyte. The same solvents as for the CV measurements were used for each compound.

[2] a) J. Klein, A. Stuckmann, S. Sobottka, L. Suntrup, M. van der Meer, P. Hommes, H.-U. Reissig, B. Sarkar, *Chem. Eur. J.* **2017**, 23, 12314; b) M. Krejčík, M. Daněk, M., F. Hartl, *J. Electroanal. Chem. Interf. Electrochem.* **1991**, 317, 179.

### S1.50 DFT

The program package ORCA 4.1. was used for all DFT calculations.<sup>[3]</sup> Starting from the molecular structure obtained from X-ray diffraction geometry optimizations were carried out using the B3LYP<sup>[4]</sup> functional and no symmetry restrictions were imposed during the optimization. For tungsten relativistic effects in zero-order regular approximation (ZORA) were included.<sup>[5]</sup> All calculations were performed with empirical Van der Waals correction (D3).<sup>[6]</sup> The restricted and unrestricted DFT methods were employed for closed and open shell molecules respectively unless stated otherwise. Convergence criteria were set to default for geometry-optimization (OPT), and tight for SCF calculations (TIGHTSCF). Triple- $\zeta$ -valence basis sets (def2-TZVP)<sup>[7]</sup> were employed for all atoms. Calculations were performed using resolution of the identity approximation<sup>[8]</sup> with matching auxiliary basis sets<sup>[8]</sup> for geometry optimizations and numerical frequency calculations and the RIJCOSX (combination of the resolution of the identity and chain of spheres algorithms) approximation for single point calculations using the B3LYP functional. Low-lying excitation energies were calculated with time-dependent DFT (TD-DFT). Solvent effects were taken into account with the conductor-like polarizable continuum model, CPCM.<sup>[9]</sup> Spin densities were calculated according to the Mulliken population analysis.<sup>[10]</sup> The absence of imaginary frequency Spin densities, molecular orbitals and difference densities were visualized with the modified Chemcraft 1.8 program.<sup>[11]</sup> All molecular orbitals are

illustrated with an iso value of 0.052. All calculated TD-DFT spectra are Gaussian broadened with a band width of 25 at half height unless otherwise noted.

- [3] F. Neese, *Wiley Interdiscip. Rev. Comput. Mol. Sci.* **2012**, 2, 73.
- [4] a) S. Grimme, S. Ehrlich, L. Goerigk, *J. Comput. Chem.* **2011**, 32, 1456; b) S. Grimme, J. Antony, S. Ehrlich, H. Krieg, *J. Chem. Phys.* **2010**, 132, 154104; c) S. Grimme, *J. Comput. Chem.* **2004**, 25, 1463; d) S. Grimme, *J. Comput. Chem.* **2006**, 27, 1787.
- [5] van Wüllen, C. *J. Chem. Phys.* **1998**, 109, 392–399.
- [6] a) S. Grimme, S. Ehrlich, L. Goerigk, *J. Comput. Chem.* **2011**, 32, 1456; b) S. Grimme, J. Antony, S. Ehrlich, H. Krieg, *J. Chem. Phys.* **2010**, 132, 154104; c) S. Grimme, *J. Comput. Chem.* **2004**, 25, 1463; d) S. Grimme, *J. Comput. Chem.* **2006**, 27, 1787.
- [7] F. Weigend, R. Ahlrichs, *Phys. Chem. Chem. Phys.* **2005**, 7, 3297.
- [8] a) F. Neese, *J. Comput. Chem.* **2003**, 24, 1740; b) F. Neese, F. Wenmohs, A. Hansen, U. Becker, *Chem. Phys.* **2009**, 356, 98; c) O. Vahtras, J. Almloef, M. W. Feyereisen, *Chem. Phys. Lett.* **1993**, 213, 514; d) J. L. Whitten, *J. Chem. Phys.* **1973**, 58, 4496; e) R. Izsak; F. Neese, *J. Chem. Phys.* **2011**, 135, 144105; f) F. Neese, G. Olbrich, *Chem. Phys. Lett.* **2002**, 362, 170; g) T. Petrenko, S. Kossmann, F. Neese, *J. Chem. Phys.* **2011**, 134, 054116.
- [9] V. Barone, M. Cossi *J. Phys. Chem. A* **1998**, 102, 1995.
- [10] R. S. Mulliken, *J. Chem. Phys.* **1955**, 23, 1833.
- [11] a) M. D. Hanwell, D. E. Curtis, D. C. Lonie, T. Vandermeersch, E. Zurek and G. R. Hutchison, *J. Cheminform.* **2012**, 4, 17; b) G. A. Zhurko *Chemcraft-Graphical Program for Visualization of Quantum Chemistry Computations*; Chemcraft, Version 1.8: Ivanovo, Russia, 2023, <http://www.chemcraftprog.com>.

## S2. Cyclic Voltammetry

### S2.10 Cyclic Voltammetry of $[\text{Cr}(\text{C}\equiv\text{C})(\text{CO})_4]$

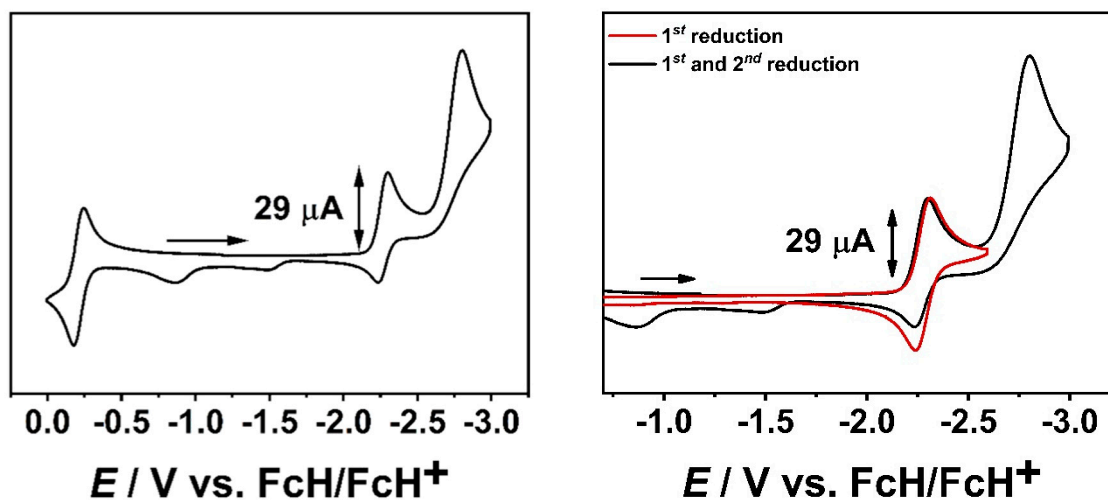

**Figure S1.** Cyclic voltammograms of  $[\text{Cr}(\text{C}\equiv\text{C})(\text{CO})_4]$  in  $\text{CH}_3\text{CN}$  and  $0.1 \text{ M}$   $\text{Bu}_4\text{NPF}_6$  at a scan rate of  $100 \text{ mV/s}$  and a glassy carbon working electrode.

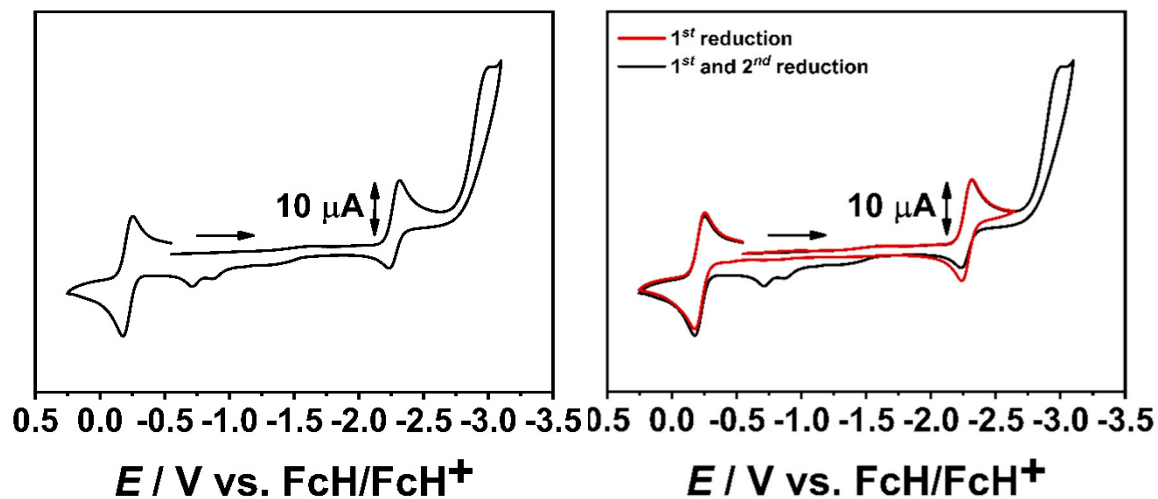

**Figure S2.** Cyclic voltammograms of  $[\text{Cr}(\text{C}\equiv\text{C})(\text{CO})_4]$  in  $\text{CH}_3\text{CN}$  and  $0.1 \text{ M}$   $\text{Bu}_4\text{NPF}_6$  at a scan rate of  $100 \text{ mV/s}$  and a gold working electrode.

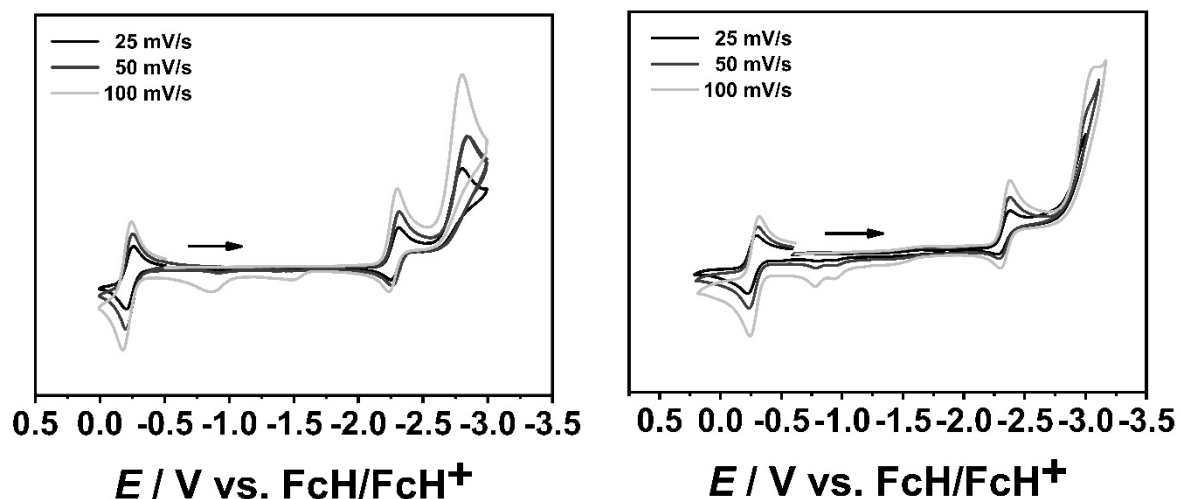

**Figure S3.** Scan rate dependency in cyclic voltammetry of complex  $[\text{Cr}(\text{C-C})(\text{CO})_4]$  in  $\text{CH}_3\text{CN}$  and  $0.1 \text{ M NBu}_4\text{PF}_6$  (GC: left; Au: right).

#### S2.20 Cyclic Voltammetry of $[\text{Cr}(\text{C-N})(\text{CO})_4]$

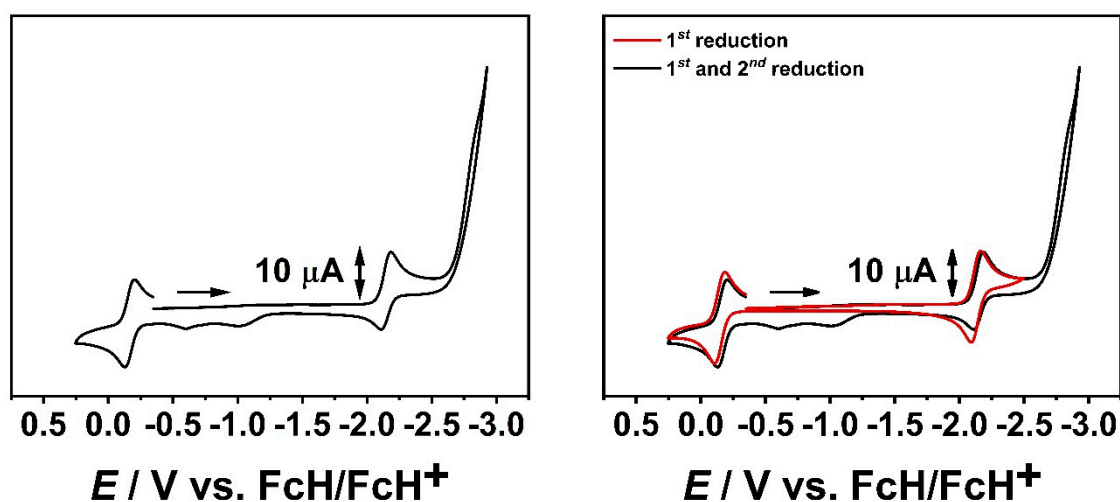

**Figure S4.** Cyclic voltammograms of  $[\text{Cr}(\text{C-N})(\text{CO})_4]$  in  $\text{CH}_3\text{CN}$  and  $0.1 \text{ M NBu}_4\text{NPF}_6$  with a scan rate of  $100 \text{ mV/s}$  and a gold working electrode.

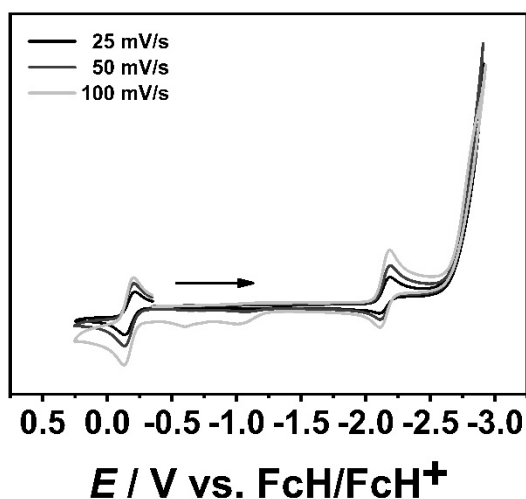

**Figure S5.** Scan rate dependency in cyclic voltammetry of complex  $[\text{Cr}(\text{C-N})(\text{CO})_4]$  in  $\text{CH}_3\text{CN}$  and  $0.1 \text{ M NBu}_4\text{PF}_6$  and a Au working electrode.

### S2.30 Cyclic Voltammetry of $[\text{Mo}(\text{C-C})(\text{CO})_4]$

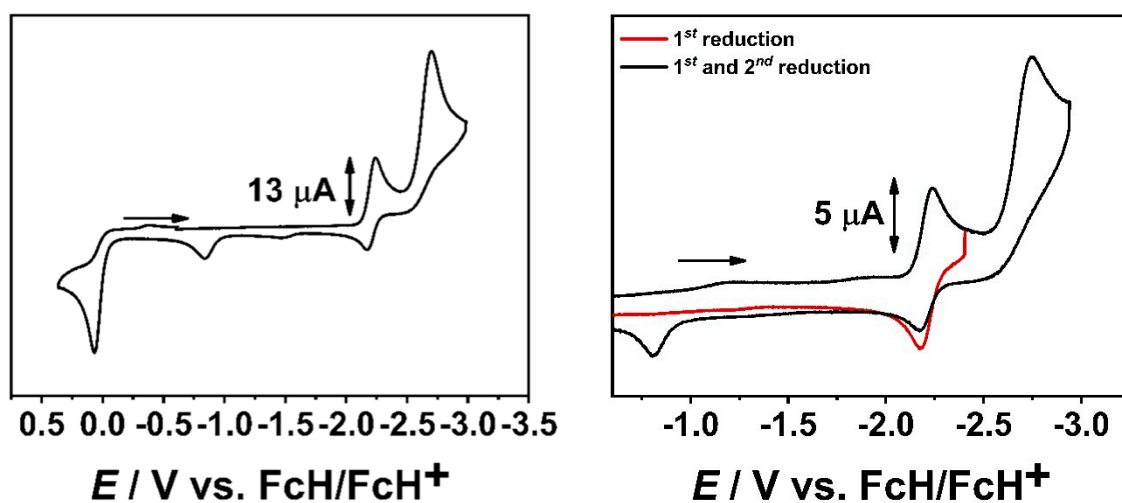

**Figure S6.** Cyclic voltammograms of  $[\text{Mo}(\text{C-C})(\text{CO})_4]$  in  $\text{CH}_3\text{CN}$  and  $0.1 \text{ M Bu}_4\text{NPF}_6$  at a scan rate of  $100 \text{ mV/s}$  and a glassy carbon working electrode.

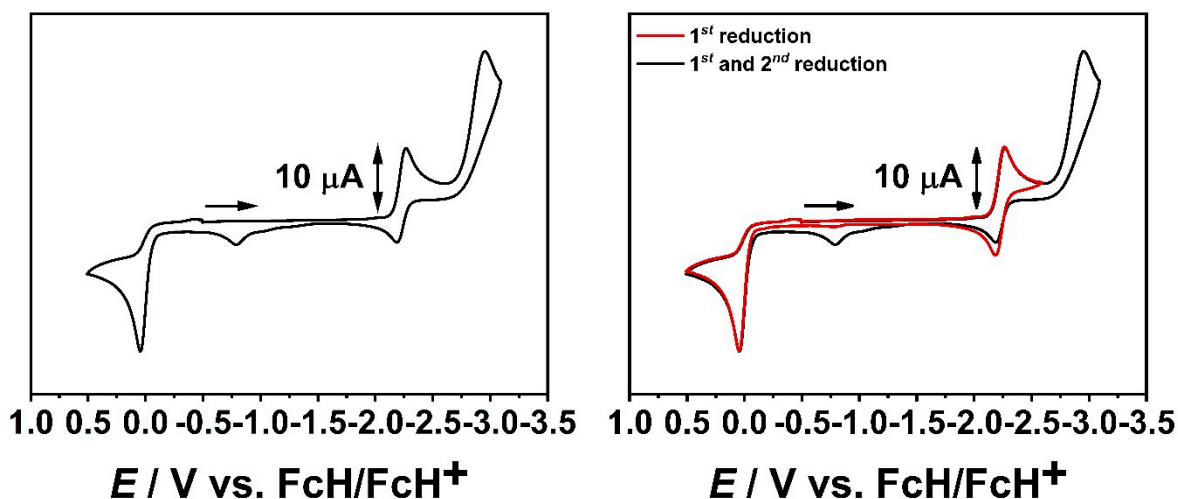

**Figure S7.** Cyclic voltammograms of  $[\text{Mo}(\text{C-C})(\text{CO})_4]$  in  $\text{CH}_3\text{CN}$  and 0.1 M  $\text{Bu}_4\text{NPF}_6$  at a scan rate of 100 mV/s and a gold working electrode.

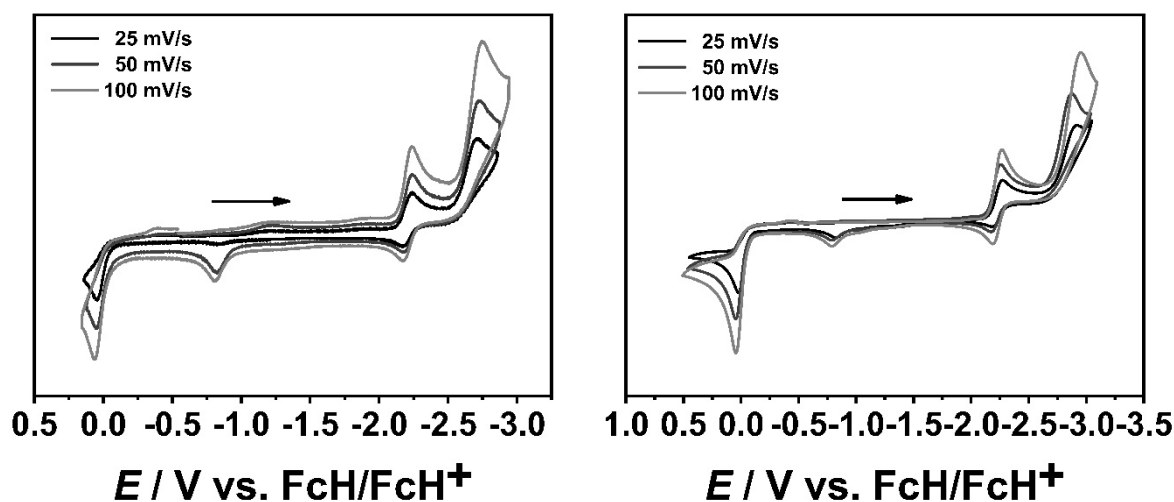

**Figure S8.** Scan rate dependency in cyclic voltammetry of complex  $[\text{Mo}(\text{C-C})(\text{CO})_4]$  in  $\text{CH}_3\text{CN}$  and 0.1 M  $\text{NBu}_4\text{PF}_6$ . (GC: left; Au: right).

S2.40 Cyclic Voltammetry of  $[\text{Mo}(\text{C-N})(\text{CO})_4]$ 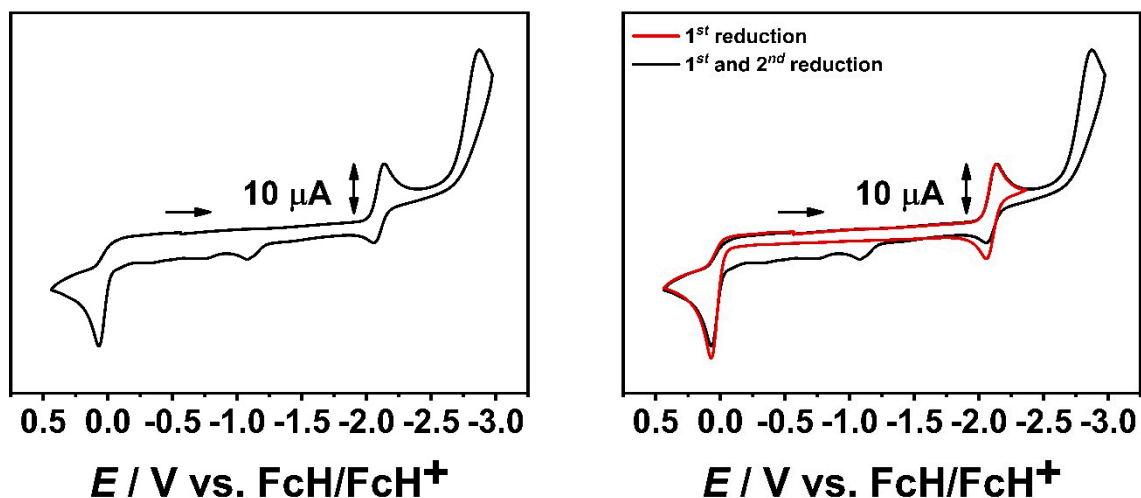

**Figure S9.** Cyclic voltammograms of  $[\text{Mo}(\text{C-N})(\text{CO})_4]$  in  $\text{CH}_3\text{CN}$  and 0.1 M  $\text{Bu}_4\text{NPF}_6$  at a scan rate of 100 mV/s and a gold working electrode.

S2.50 Cyclic Voltammetry of  $[\text{W}(\text{C-C})(\text{CO})_4]$ 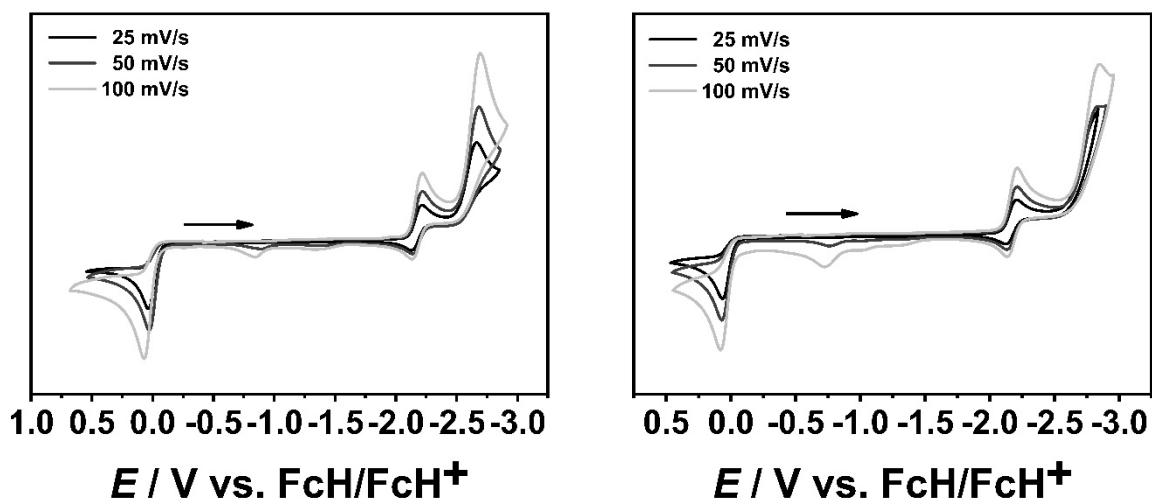

**Figure S10.** Scan rate dependency in cyclic voltammetry of complex  $[\text{W}(\text{C-C})(\text{CO})_4]$  in  $\text{CH}_3\text{CN}$  and 0.1 M  $\text{NBu}_4\text{PF}_6$ . (GC: left; Au: right).



S2.60 Cyclic Voltammetry of  $[\text{W}(\text{C}-\text{N})(\text{CO})_4]$ 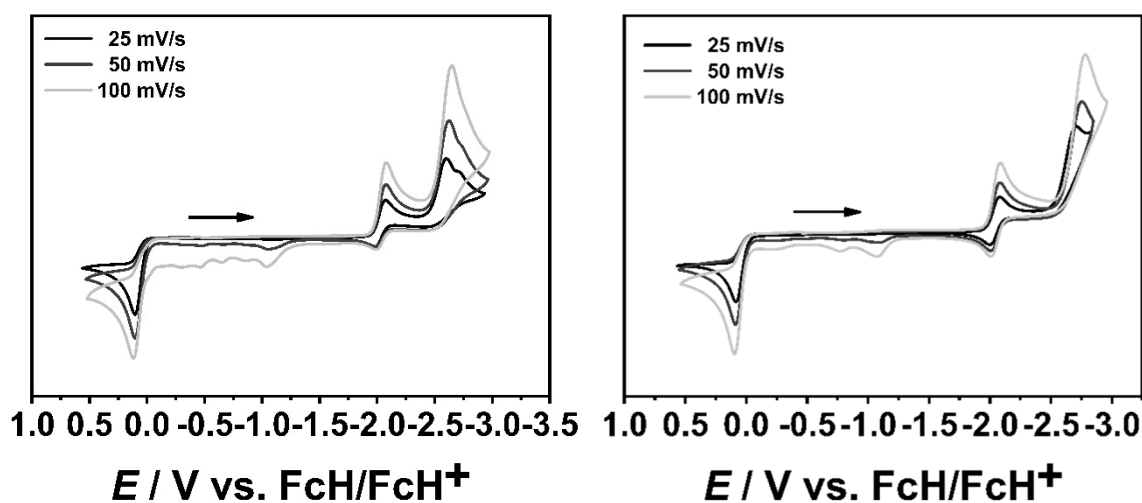

**Figure S11.** Scan rate dependency in cyclic voltammetry of complex  $[\text{W}(\text{C}-\text{N})(\text{CO})_4]$  in  $\text{CH}_3\text{CN}$  and 0.1 M  $\text{NBu}_4\text{PF}_6$ . (GC: left; Au: right).

**Table S1.** Redox potentials of  $[\text{M}(\text{C}-\text{C})(\text{CO})_4]$  and  $[\text{M}(\text{C}-\text{N})(\text{CO})_4]$  ( $\text{M} = \text{Cr}, \text{Mo}, \text{W}$ ) in  $\text{CH}_3\text{CN}$  and 0.1 M  $\text{NBu}_4\text{PF}_6$  at 100 mV/s with a gold working electrode.

|                                               | 1. Red. / V             |              | 2. Red. / V         | 1. Ox. / V             |              |
|-----------------------------------------------|-------------------------|--------------|---------------------|------------------------|--------------|
|                                               | $E_{1/2}^{\text{red}1}$ | $\Delta E_p$ | $E_p^{\text{red}2}$ | $E_{1/2}^{\text{ox}1}$ | $\Delta E_p$ |
| $[\text{Cr}(\text{C}-\text{C})(\text{CO})_4]$ | -2.28                   | 0.08         | -3.08               | -0.21                  | 0.07         |
| $[\text{Cr}(\text{C}-\text{N})(\text{CO})_4]$ | -2.13                   | 0.08         | -2.89               | -0.16                  | 0.08         |
| $[\text{Mo}(\text{C}-\text{C})(\text{CO})_4]$ | -2.22                   | 0.08         | -2.96               | 0.05 <sup>a</sup>      |              |
| $[\text{Mo}(\text{C}-\text{N})(\text{CO})_4]$ | -2.10                   | 0.08         | -2.88               | 0.07 <sup>a</sup>      |              |
| $[\text{W}(\text{C}-\text{C})(\text{CO})_4]$  | -2.19                   | 0.07         | -2.85               | 0.07 <sup>a</sup>      |              |
| $[\text{W}(\text{C}-\text{N})(\text{CO})_4]$  | -2.04                   | 0.08         | -2.78               | 0.10 <sup>a</sup>      |              |

$$^a = E_p^{\text{ox}}$$

### S3. Spin Density Calculations

**Table S2.** Composition of  $[\text{M}(\text{C}-\text{C})(\text{CO})_4]^-$  and  $[\text{M}(\text{C}-\text{N})(\text{CO})_4]^-$  ( $\text{M} = \text{Cr}, \text{Mo}, \text{W}$ ) in Löwdin spin density.

| MO                                                              | Composition (%) |              |                        |                        |
|-----------------------------------------------------------------|-----------------|--------------|------------------------|------------------------|
|                                                                 | M               | L +   -      | CO <sub>ax</sub> +   - | CO <sub>eq</sub> +   - |
| $[\text{Cr}(\text{C}-\text{C})(\text{CO})_4]^-$                 | -0.8            | 103.8   -3.4 | 0.4   -0.3             | 0.3   0.0              |
| $[\text{Cr}(\text{C}-\text{N})(\text{CO})_4]^-$ <sup>[12]</sup> | -0.4            | 99.3   -1.0  | 0.9   0.0              | 1.2   0.0              |
| $[\text{Mo}(\text{C}-\text{C})(\text{CO})_4]^-$                 | -0.5            | 103.0   -2.7 | 0.3   -0.1             | 0.5   -0.5             |
| $[\text{Mo}(\text{C}-\text{N})(\text{CO})_4]^-$ <sup>[12]</sup> | -0.7            | 98.5   -1.0  | 1.1   0.0              | 2.1   0.0              |
| $[\text{W}(\text{C}-\text{C})(\text{CO})_4]^-$                  | 0.0             | 100.4   -0.0 | 0.0   0.0              | 0.0   0.0              |
| $[\text{W}(\text{C}-\text{N})(\text{CO})_4]^-$                  | 0.0             | 77.5   -15.2 | 0.0   0.0              | 0.0   0.0              |

[12] T. Bens, P. Boden, P. Di Martino-Fumo, J. Beerhues, U. Albold, S. Sobottka, N. I. Neuman, M. Gerhards, B. Sarkar, *Inorg. Chem.* **2020**, *59*, 15504.

### S4. IR-Spectroelectrochemistry and DFT Calculations

#### S4.10 IR-Spectroelectrochemistry of $[\text{Cr}(\text{C}-\text{C})(\text{CO})_4]$

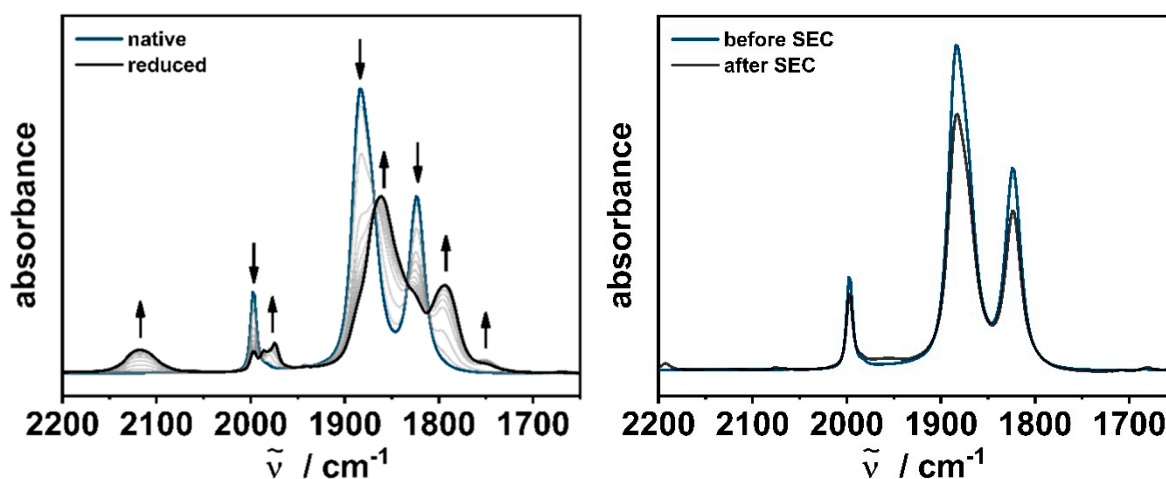

**Figure S12.** Changes in the IR spectra of  $[\text{Cr}(\text{C}-\text{C})(\text{CO})_4]$  in  $\text{CH}_3\text{CN}/0.1 \text{ M Bu}_4\text{NPF}_6$  with a Au working electrode during the first reduction (left) and after IR-SEC (right).

**Table S3.** Experimental and calculated changes (B3LYP/RIJCOSX/D3BJ/def2-TZVP) in the CO frequencies of  $[\text{Cr}(\text{C}-\text{C})(\text{CO})_4]$  in  $\text{CH}_3\text{CN}/0.1 \text{ M Bu}_4\text{NPF}_6$  with a Au working electrode during the first reduction.

|       |                                                 | $\tilde{\nu}(\text{CO}) / \text{cm}^{-1}$ |      |           |      |           |      |      |
|-------|-------------------------------------------------|-------------------------------------------|------|-----------|------|-----------|------|------|
| exp.  | $[\text{Cr}(\text{C}-\text{C})(\text{CO})_4]$   | 1998                                      | 1882 | 1874 (sh) | 1824 |           |      |      |
|       | $[\text{Cr}(\text{C}-\text{C})(\text{CO})_4]^-$ | 2118 <sup>a</sup>                         | 1986 | 1975      | 1861 | 1845 (sh) | 1794 | 1751 |
| calc. | $[\text{Cr}(\text{C}-\text{C})(\text{CO})_4]$   | 2045                                      | 1906 | 1903      | 1853 |           |      |      |
|       | $[\text{Cr}(\text{C}-\text{C})(\text{CO})_4]^-$ | 2029                                      | 1884 | 1876      | 1820 |           |      |      |

<sup>a</sup> free CO

S4.11 Calculated IR Spectra of  $[\text{Cr}(\text{C}-\text{C})(\text{CO})_4]$  and  $[\text{Cr}(\text{C}-\text{C})(\text{CO})_4]^-$ 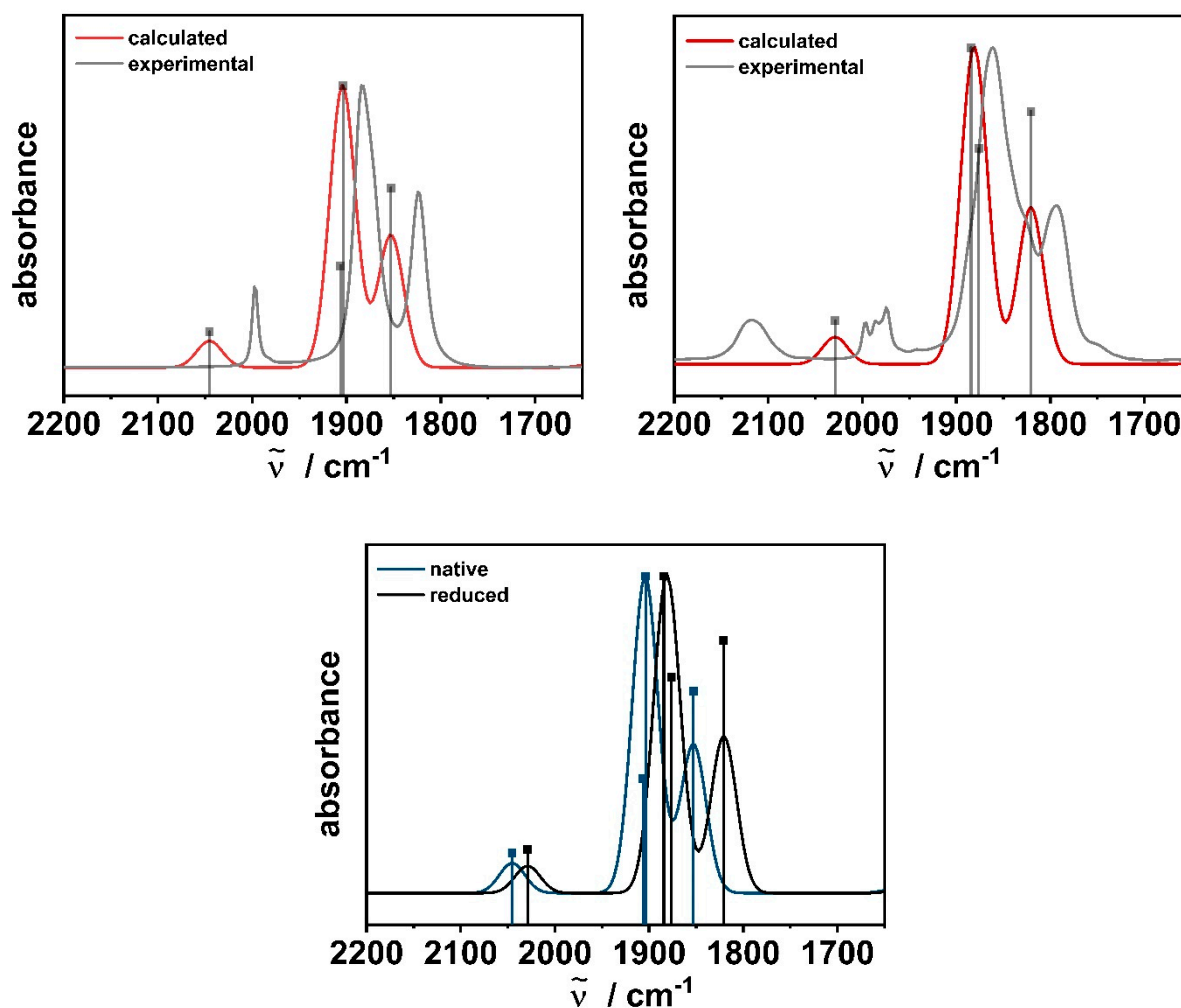

**Figure S13.** Top left: Calculated (red) and experimental (grey) IR spectra of  $[\text{Cr}(\text{C}-\text{C})(\text{CO})_4]$ , Top right: Calculated (red) and experimental (grey) IR spectra of  $[\text{Cr}(\text{C}-\text{C})(\text{CO})_4]^-$  and bottom centered: Overlay of calculated  $[\text{Cr}(\text{C}-\text{C})(\text{CO})_4]$  (blue) and  $[\text{Cr}(\text{C}-\text{C})(\text{CO})_4]^-$  (black) (B3LYP/RIJCOSX/D3BJ/def2-TZVP, FWHM = 32).

S4.20 IR-Spectroelectrochemistry of  $[\text{Mo}(\text{C-C})(\text{CO})_4]$ 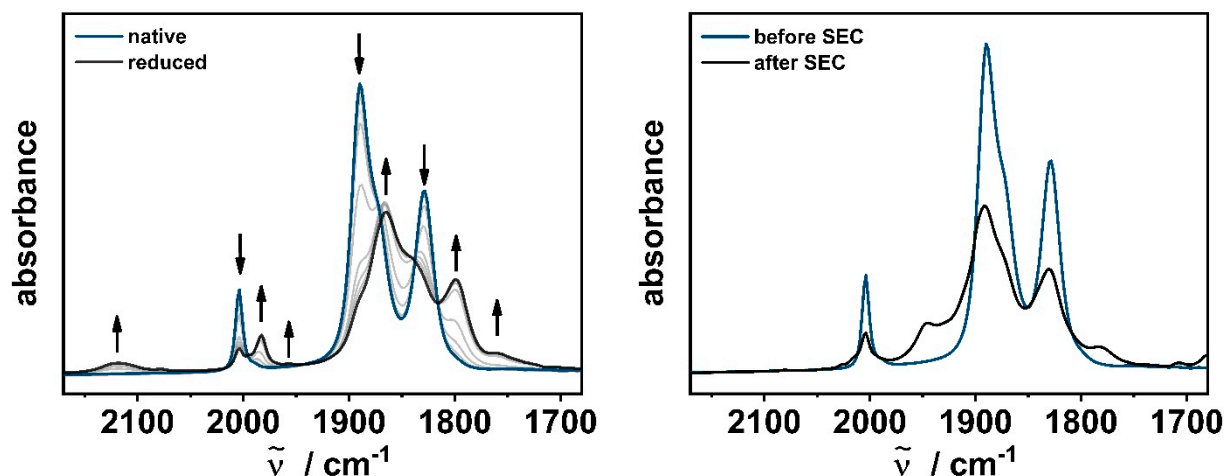

**Figure S14.** Changes in the IR spectra of  $[\text{Mo}(\text{C-C})(\text{CO})_4]$  in  $\text{CH}_3\text{CN}/0.1 \text{ M Bu}_4\text{NPF}_6$  with a Au working electrode during the first reduction (left) and after IR-SEC (right).

**Table S4.** Experimental and calculated changes (B3LYP/RIJCOSX/D3BJ/def2-TZVP) in the CO frequencies of  $[\text{Mo}(\text{C-C})(\text{CO})_4]$  in  $\text{CH}_3\text{CN}/0.1 \text{ M Bu}_4\text{NPF}_6$  with a Au working electrode during the first reduction.

|       |                                          | $\tilde{\nu} (\text{CO}) / \text{cm}^{-1}$ |      |           |      |                |
|-------|------------------------------------------|--------------------------------------------|------|-----------|------|----------------|
| exp.  | $[\text{Mo}(\text{C-C})(\text{CO})_4]$   | 2004                                       | 1890 | 1876 (sh) | 1828 |                |
|       | $[\text{Mo}(\text{C-C})(\text{CO})_4]^-$ | 2119 <sup>a</sup>                          | 1982 | 1957      | 1865 | 1842 1799 1759 |
| calc. | $[\text{Mo}(\text{C-C})(\text{CO})_4]$   | 2051                                       | 1904 | 1894      | 1830 |                |
|       | $[\text{Mo}(\text{C-C})(\text{CO})_4]^-$ | 2036                                       | 1881 | 1869      | 1807 |                |

<sup>a</sup> free CO

S4.21 Calculated IR Spectra of  $[\text{Mo}(\text{C}-\text{C})(\text{CO})_4]$  and  $[\text{Mo}(\text{C}-\text{C})(\text{CO})_4]^-$ 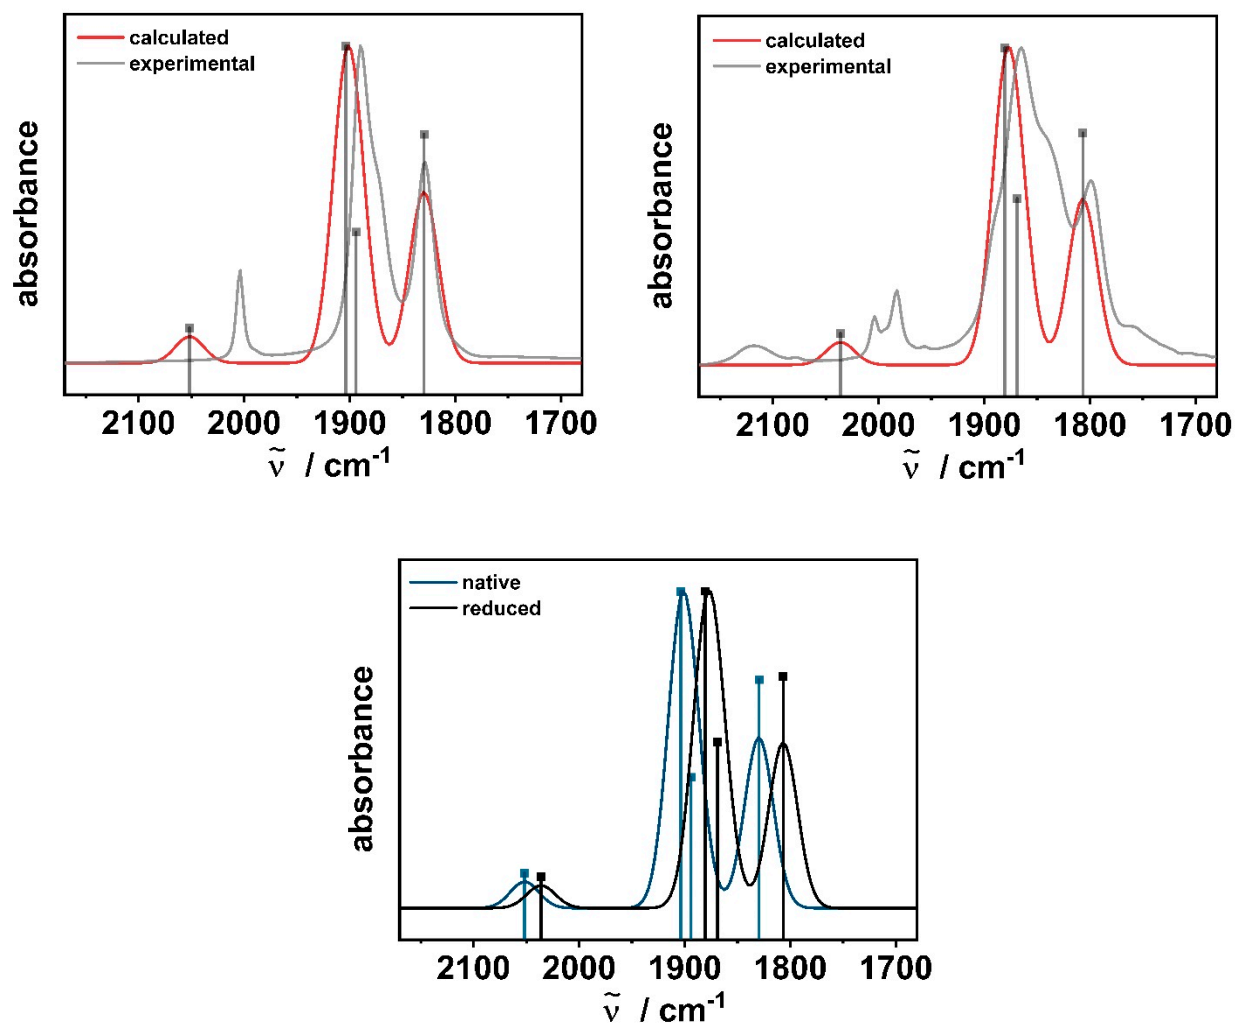

**Figure S15.** Top left: Calculated (red) and experimental (grey) IR spectra of  $[\text{Mo}(\text{C}-\text{C})(\text{CO})_4]$ , Top right: Calculated (red) and experimental (grey) IR spectra of  $[\text{Mo}(\text{C}-\text{C})(\text{CO})_4]^-$  and bottom centered: Overlay of calculated  $[\text{Mo}(\text{C}-\text{C})(\text{CO})_4]$  (blue) and  $[\text{Mo}(\text{C}-\text{C})(\text{CO})_4]^-$  (black) (B3LYP/RIJCOSX/D3BJ/def2-TZVP, FWHM = 32).

S4.30 IR-Spectroelectrochemistry of  $[\text{W}(\text{C}\equiv\text{C})(\text{CO})_4]$ 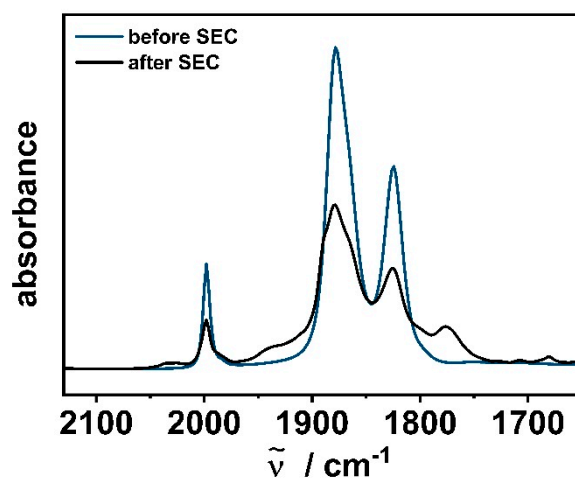

**Figure S16.** Changes in the IR spectra of  $[\text{W}(\text{C}\equiv\text{C})(\text{CO})_4]$  in  $\text{CH}_3\text{CN}/0.1 \text{ M Bu}_4\text{NPF}_6$  with a Au working electrode after the first reduction.

**Table S5.** Experimental and calculated changes (B3LYP/RIJCOSX/D3BJ/def2-TZVP) in the CO frequencies of  $[\text{W}(\text{C}\equiv\text{C})(\text{CO})_4]$  in  $\text{CH}_3\text{CN}/0.1 \text{ M Bu}_4\text{NPF}_6$  with a Au working electrode during the first reduction.

|       |                           | $\tilde{\nu} \text{ (CO) / cm}^{-1}$ |      |      |      |      |      |      |      |      |
|-------|---------------------------|--------------------------------------|------|------|------|------|------|------|------|------|
| exp.  | $[\text{W(C-C)(CO)}_4]$   | 1998                                 | 1878 | 1871 | 1824 |      |      |      |      |      |
|       | $[\text{W(C-C)(CO)}_4]^-$ | 2119 <sup>a</sup>                    | 2065 | 1986 | 1877 | 1853 | 1795 | 1783 | 1754 | 1730 |
| calc. | $[\text{W(C-C)(CO)}_4]$   | 2047                                 | 1893 | 1889 | 1822 |      |      |      |      |      |
|       | $[\text{W(C-C)(CO)}_4]^-$ | 2027                                 | 1864 | 1856 | 1790 |      |      |      |      |      |

<sup>a</sup> free CO

S4.31 Calculated IR Spectra of  $[\text{W}(\text{C}-\text{C})(\text{CO})_4]$  and  $[\text{W}(\text{C}-\text{C})(\text{CO})_4]^-$ 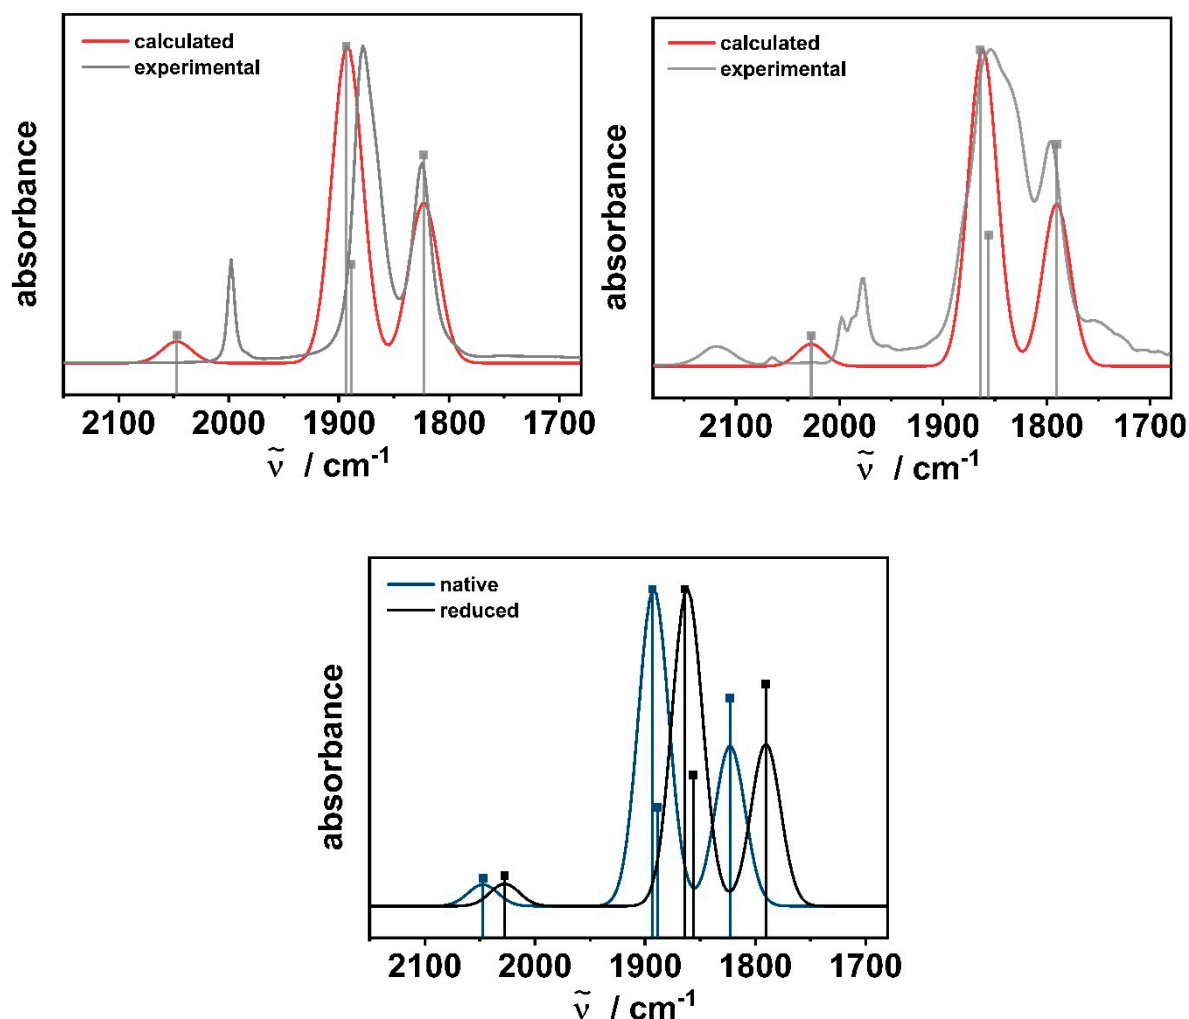

**Figure S17.** Top left: Calculated (red) and experimental (grey) IR spectra of  $[\text{W}(\text{C}-\text{C})(\text{CO})_4]$ , Top right: Calculated (red) and experimental (grey) IR spectra of  $[\text{W}(\text{C}-\text{C})(\text{CO})_4]^-$  and bottom centered: Overlay of calculated  $[\text{W}(\text{C}-\text{C})]$  (blue) and  $[\text{W}(\text{C}-\text{C})(\text{CO})_4]^-$  (black) (B3LYP/RIJCOSX/D3BJ/ZORA/def2-TZVP, FWHM = 32).



S4.40 IR-Spectroelectrochemistry of  $[\text{W}(\text{C-N})(\text{CO})_4]$ 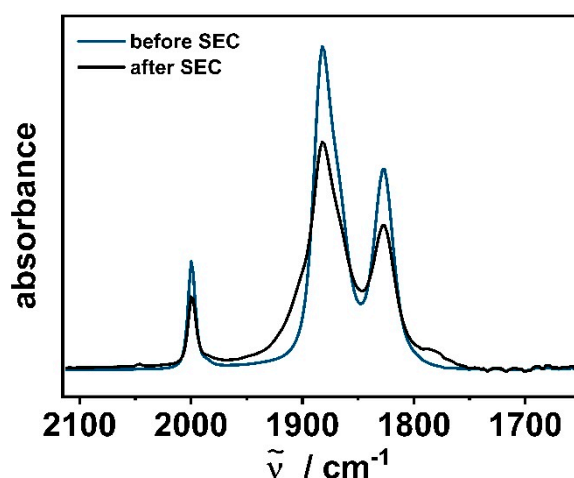

**Figure S13.** Changes in the IR spectra of  $[\text{W}(\text{C-N})(\text{CO})_4]$  in  $\text{CH}_3\text{CN}/0.1 \text{ M Bu}_4\text{NPF}_6$  with a Au working electrode after the first reduction.

**Table S6.** Experimental and calculated changes (B3LYP/RIJCOSX/D3BJ/def2-TZVP) in the CO frequencies of  $[\text{W}(\text{C-N})(\text{CO})_4]$  in  $\text{CH}_3\text{CN}/0.1 \text{ M Bu}_4\text{NPF}_6$  with a Au working electrode during the first reduction.

|       |                                         | $\tilde{\nu}(\text{CO}) / \text{cm}^{-1}$ |      |           |      |
|-------|-----------------------------------------|-------------------------------------------|------|-----------|------|
| exp.  | $[\text{W}(\text{C-N})(\text{CO})_4]$   | 2000                                      | 1882 | 1873 (sh) | 1826 |
|       | $[\text{W}(\text{C-N})(\text{CO})_4]^-$ | 1979                                      | 1878 | 1838      | 1792 |
| calc. | $[\text{W}(\text{C-N})(\text{CO})_4]$   | 2039                                      | 1892 | 1881      | 1830 |
|       | $[\text{W}(\text{C-N})(\text{CO})_4]^-$ | 2018                                      | 1853 | 1843      | 1790 |

S4.41 Calculated IR Spectra of  $[\text{W}(\text{C-N})(\text{CO})_4]$  and  $[\text{W}(\text{C-N})(\text{CO})_4]^-$ 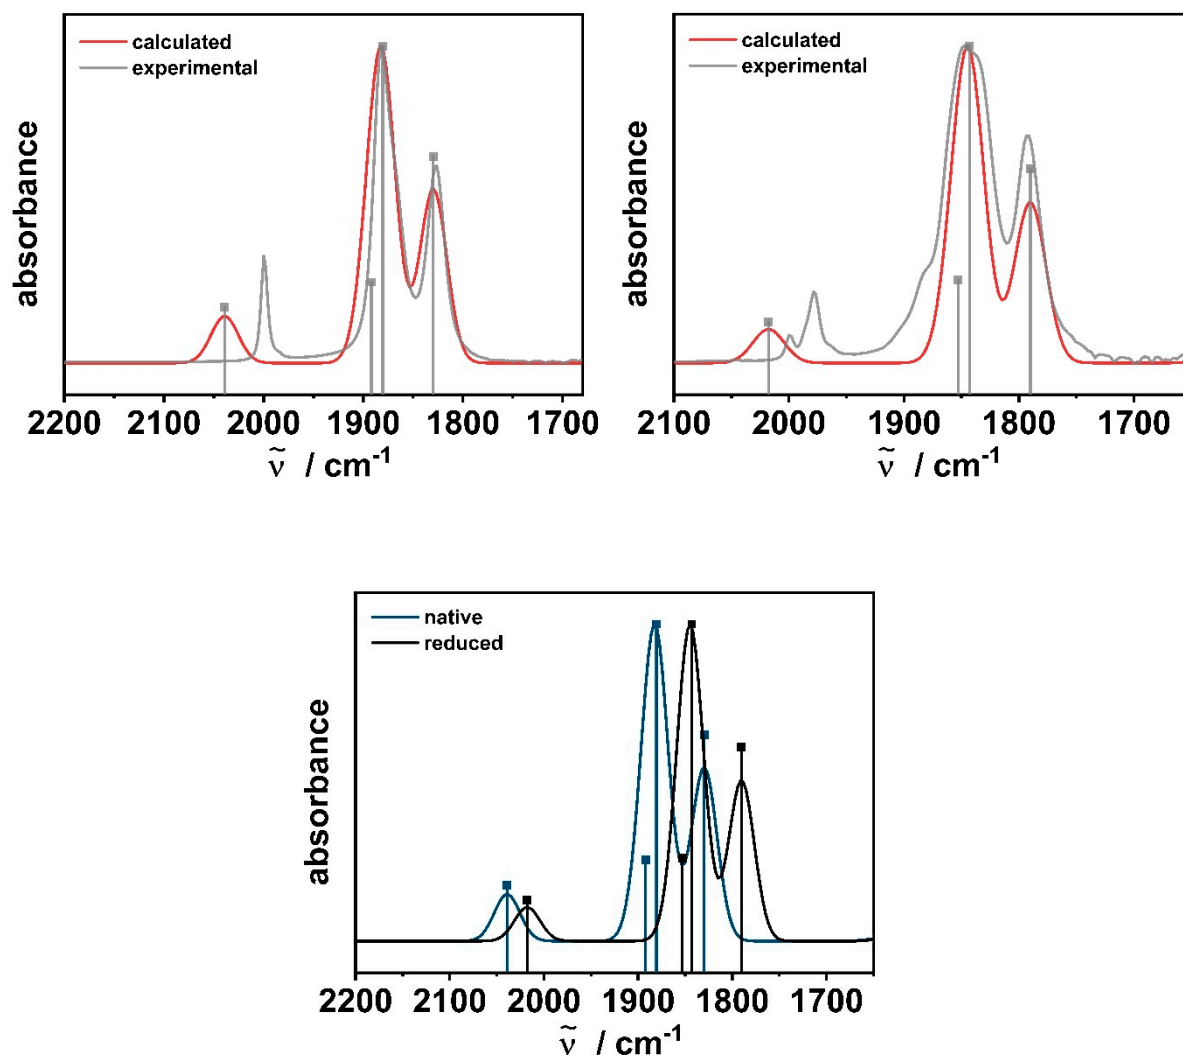

**Figure S19.** Top left: Calculated (red) and experimental (grey) IR spectra of  $[\text{W}(\text{C-N})(\text{CO})_4]$ , Top right: Calculated (red) and experimental (grey) IR spectra of  $[\text{W}(\text{C-N})(\text{CO})_4]^-$  and bottom centered: Overlay of calculated  $[\text{W}(\text{C-N})(\text{CO})_4]$  (blue) and  $[\text{W}(\text{C-N})(\text{CO})_4]^-$  (black) (B3LYP/RIJCOSX/D3BJ/ZORA/def2-TZVP, FWHM = 32).

## S5. UV/vis/NIR-Spectroelectrochemistry

### S5.10 UV/vis/NIR-Spectroelectrochemistry of $[\text{Cr}(\text{C-C})(\text{CO})_4]$

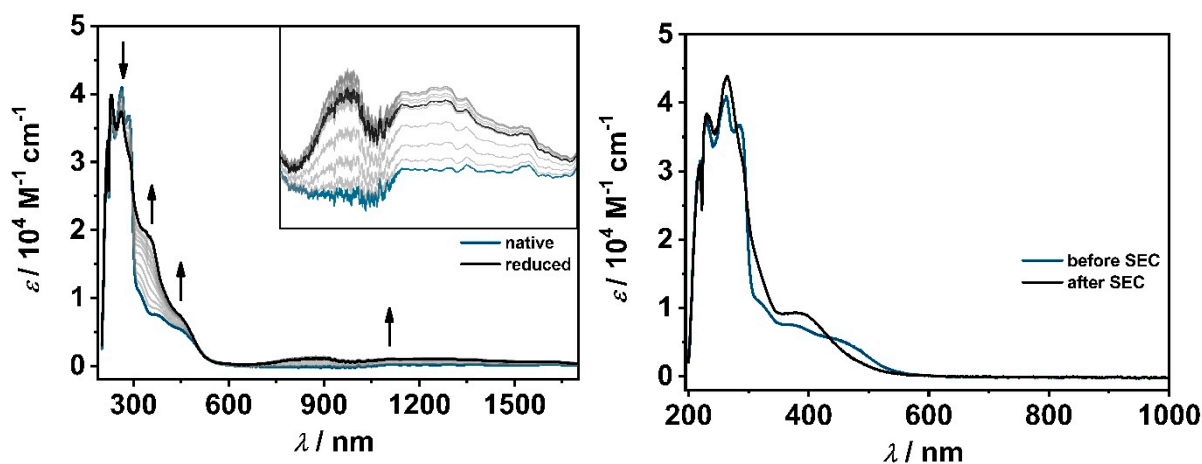

**Figure S20.** Changes in the UV/VIS spectra of  $[\text{Cr}(\text{C-C})(\text{CO})_4]$  (left, Inset: 600–1800 nm) in  $\text{CH}_3\text{CN}/0.1 \text{ M Bu}_4\text{NPF}_6$  during the first reduction with a Au working electrode and after UV/vis/NIR-SEC (right).

### S5.20 UV/vis/NIR-Spectroelectrochemistry of $[\text{Mo}(\text{C-C})]$

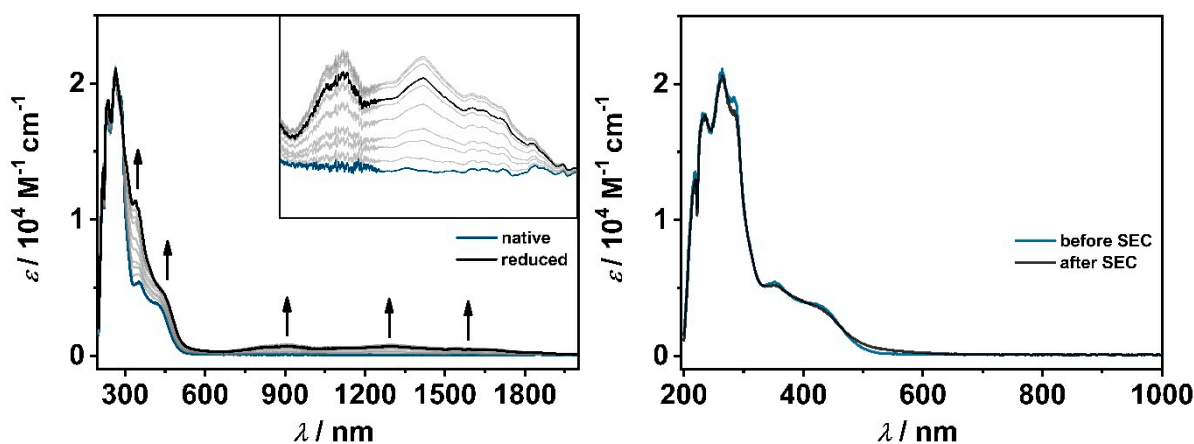

**Figure S21.** Changes in the UV/VIS spectra of  $[\text{Mo}(\text{C-C})(\text{CO})_4]$  (left, Inset: 600–2000 nm) in  $\text{CH}_3\text{CN}/0.1 \text{ M Bu}_4\text{NPF}_6$  during the first reduction with a Au working electrode and after UV/vis/NIR-SEC (right).

S5.30 UV/vis/NIR-Spectroelectrochemistry of  $[\text{W}(\text{C}-\text{C})(\text{CO})_4]$ 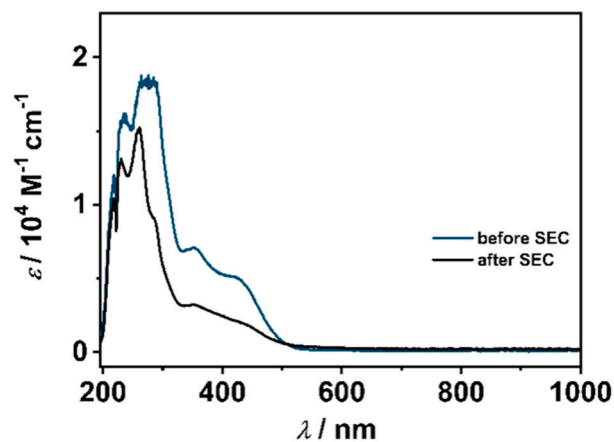

**Figure S22.** Changes in the UV/VIS spectra of  $[\text{W}(\text{C}-\text{C})(\text{CO})_4]$  in  $\text{CH}_3\text{CN}/0.1 \text{ M Bu}_4\text{NPF}_6$  after the first reduction with a Au working electrode.

S5.40 UV/vis/NIR-Spectroelectrochemistry of  $[\text{W}(\text{C}-\text{N})(\text{CO})_4]$ 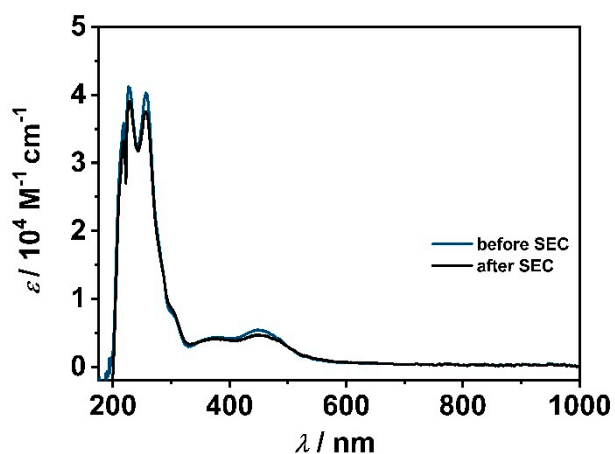

**Figure S23.** Changes in the UV/VIS spectra of  $[\text{W}(\text{C}-\text{N})(\text{CO})_4]$  in  $\text{CH}_3\text{CN}/0.1 \text{ M Bu}_4\text{NPF}_6$  after the first reduction with a Au working electrode.

## S6. TD-DFT Calculations

### S6.10 TD-DFT Calculations of $[\text{Cr}(\text{C}-\text{C})(\text{CO})_4]^-$

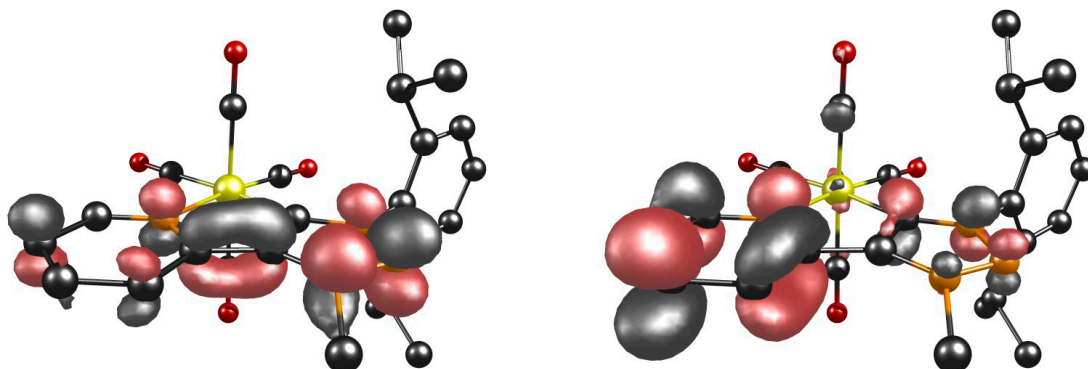

**Figure S24.**  $\alpha$ -HOMO (left) and  $\alpha$ -LUMO (right) of complex  $[\text{Cr}(\text{C}-\text{C})(\text{CO})_4]^-$ .

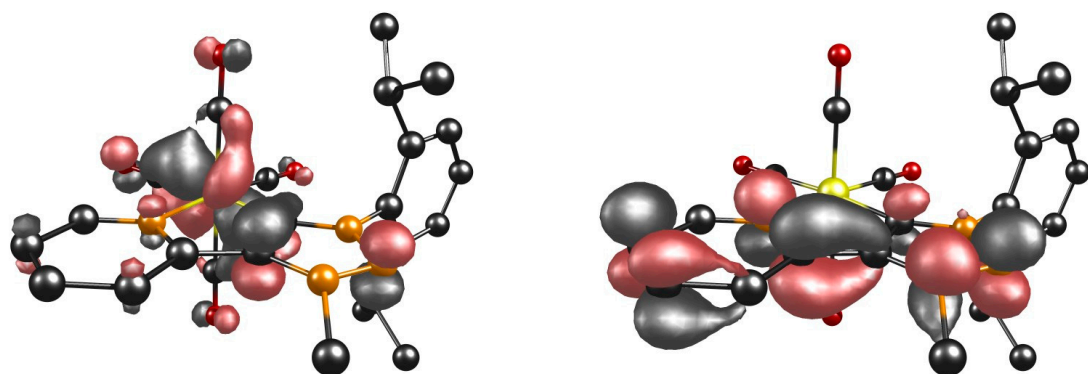

**Figure S25.**  $\beta$ -HOMO (left) and  $\beta$ -LUMO (right) of complex  $[\text{Cr}(\text{C}-\text{C})(\text{CO})_4]^-$ .

**Table S7.** Energies of selected orbitals.

| MO                                                                     | Energy / eV |
|------------------------------------------------------------------------|-------------|
| $[\text{Cr}(\text{C} - \text{C})(\text{CO})_4]^-_{\alpha\text{-HOMO}}$ | -2.9139     |
| $[\text{Cr}(\text{C} - \text{C})(\text{CO})_4]^-_{\alpha\text{-LUMO}}$ | -0.7303     |
| $[\text{Cr}(\text{C} - \text{C})(\text{CO})_4]^-_{\beta\text{-HOMO}}$  | -4.7504     |
| $[\text{Cr}(\text{C} - \text{C})(\text{CO})_4]^-_{\beta\text{-LUMO}}$  | -1.0098     |

**Table S8.** Selected experimental UV/vis data of  $[\text{Cr}(\text{C}-\text{C})(\text{CO})_4]^-$  together with selected TD-DFT calculations.

| State | $\lambda_{\text{exp}}(\lambda_{\text{DFT}})$ / nm | $\epsilon / 10^4 \text{ M}^{-1} \text{ cm}^{-1}(f)$ | Main contributing excitation (%)                                                                                                                                                       |
|-------|---------------------------------------------------|-----------------------------------------------------|----------------------------------------------------------------------------------------------------------------------------------------------------------------------------------------|
| 1     | 1233 (1042)                                       | 0.09 (0.021)                                        | $\alpha\text{-HOMO} \rightarrow \alpha\text{-LUMO}$ (92)                                                                                                                               |
| 2     | 1233 (908)                                        | 0.09 (0.004)                                        | $\alpha\text{-HOMO} \rightarrow \alpha\text{-LUMO}+1$ (99)                                                                                                                             |
| 5     | 874 (767)                                         | 0.10 (0.008)                                        | $\alpha\text{-HOMO} \rightarrow \alpha\text{-LUMO}+3$ (21)<br>$\alpha\text{-HOMO} \rightarrow \alpha\text{-LUMO}+4$ (77)                                                               |
| 3     | 874 (712)                                         | 0.10 (0.028)                                        | $\alpha\text{-HOMO} \rightarrow \alpha\text{-LUMO}+2$ (71)<br>$\alpha\text{-HOMO} \rightarrow \alpha\text{-LUMO}+3$ (17)                                                               |
| 4     | 874 (690)                                         | 0.10 (0.013)                                        | $\alpha\text{-HOMO} \rightarrow \alpha\text{-LUMO}+2$ (27)<br>$\alpha\text{-HOMO} \rightarrow \alpha\text{-LUMO}+3$ (55)<br>$\alpha\text{-HOMO} \rightarrow \alpha\text{-LUMO}+4$ (13) |
| 6     | 874 (661)                                         | 0.10 (0.005)                                        | $\alpha\text{-HOMO} \rightarrow \alpha\text{-LUMO}+5$ (95)                                                                                                                             |
| 12    | 444 (420)                                         | 0.74 (0.052)                                        | $\alpha\text{-HOMO} \rightarrow \alpha\text{-LUMO}+6$ (20)<br>$\beta\text{-HOMO}-1 \rightarrow \beta\text{-LUMO}$ (23)<br>$\beta\text{-HOMO} \rightarrow \beta\text{-LUMO}$ (39)       |
| 19    | 347 (386)                                         | 1.90 (0.014)                                        | $\alpha\text{-HOMO}-2 \rightarrow \alpha\text{-LUMO}$ (55)<br>$\alpha\text{-HOMO} \rightarrow \alpha\text{-LUMO}+8$ (12)                                                               |
| 23    | 289 (362)                                         | 3.07 (0.040)                                        | $\alpha\text{-HOMO}-3 \rightarrow \alpha\text{-LUMO}$ (31)<br>$\alpha\text{-HOMO} \rightarrow \alpha\text{-LUMO}+10$ (10)<br>$\beta\text{-HOMO}-2 \rightarrow \beta\text{-LUMO}$ (95)  |

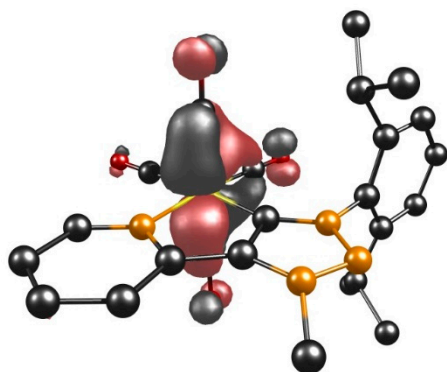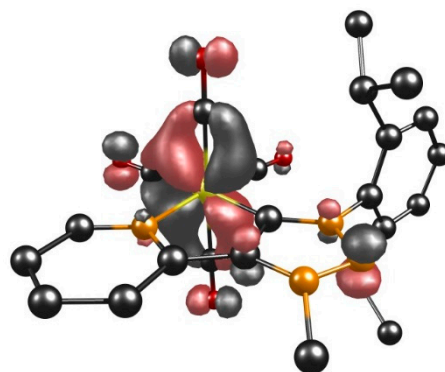

$\alpha$ -HOMO-3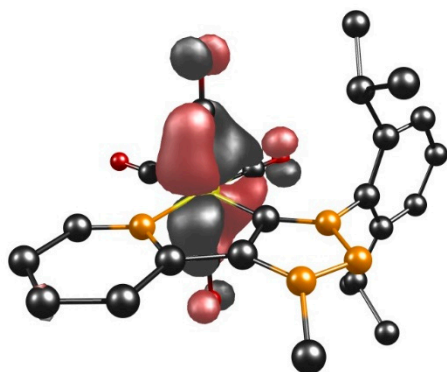 $\alpha$ -HOMO-2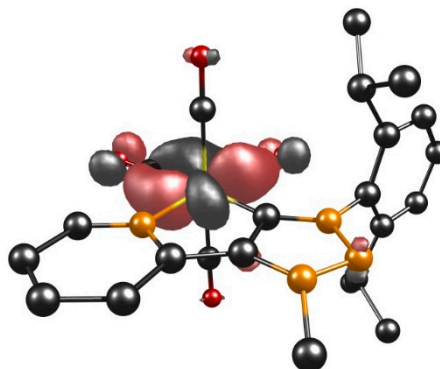 $\beta$ -HOMO-2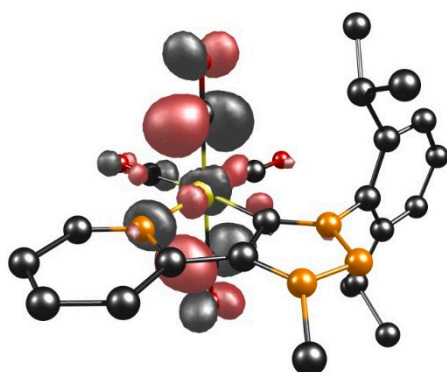 $\beta$ -HOMO-1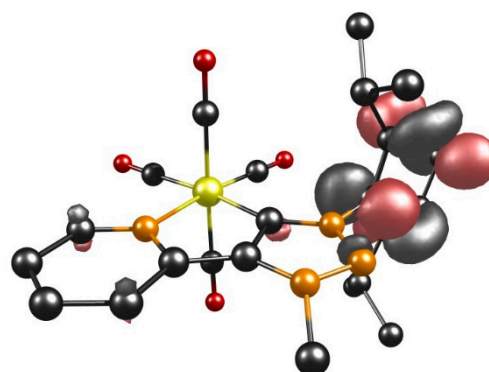 $\alpha$ -LUMO+1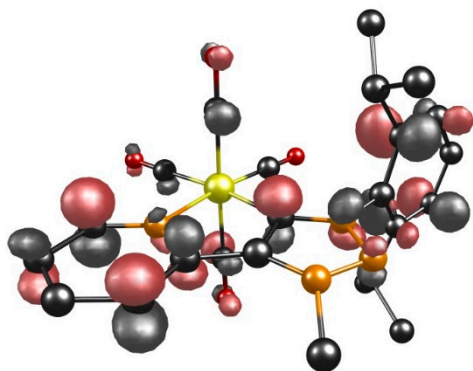 $\alpha$ -LUMO+2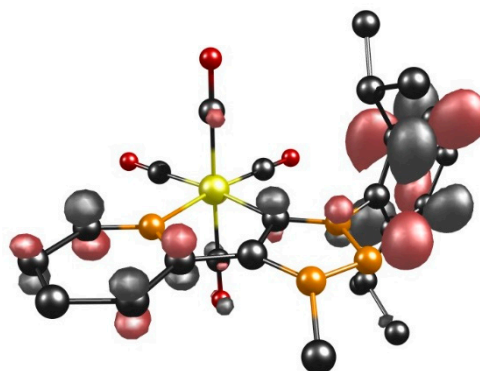

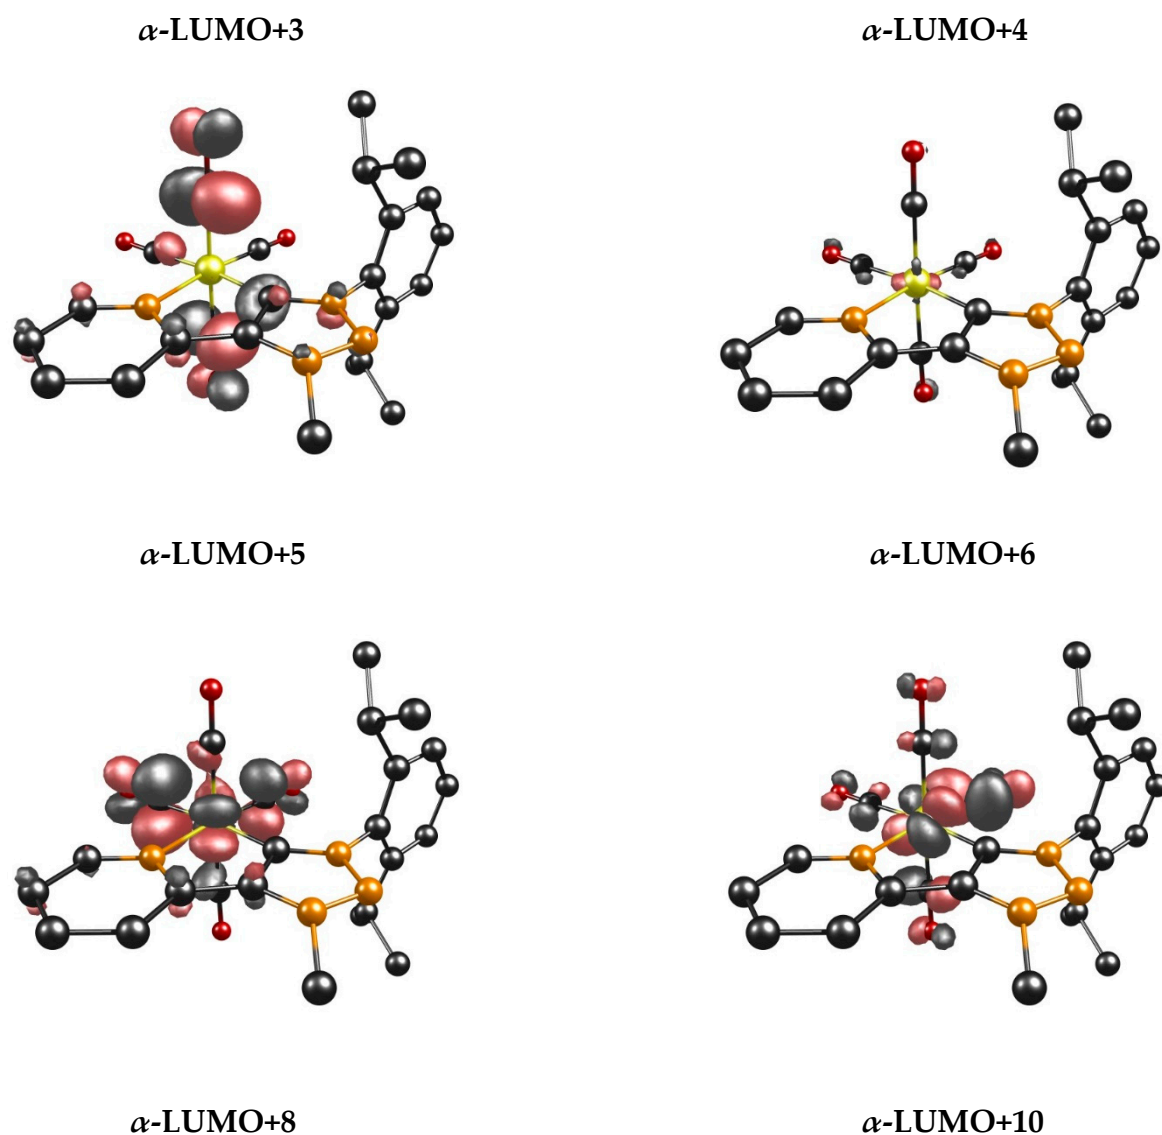

Figure S26. Involved TD-DFT orbitals of complex  $[\text{Cr}(\text{C}-\text{C})(\text{CO})_4]^-$ .

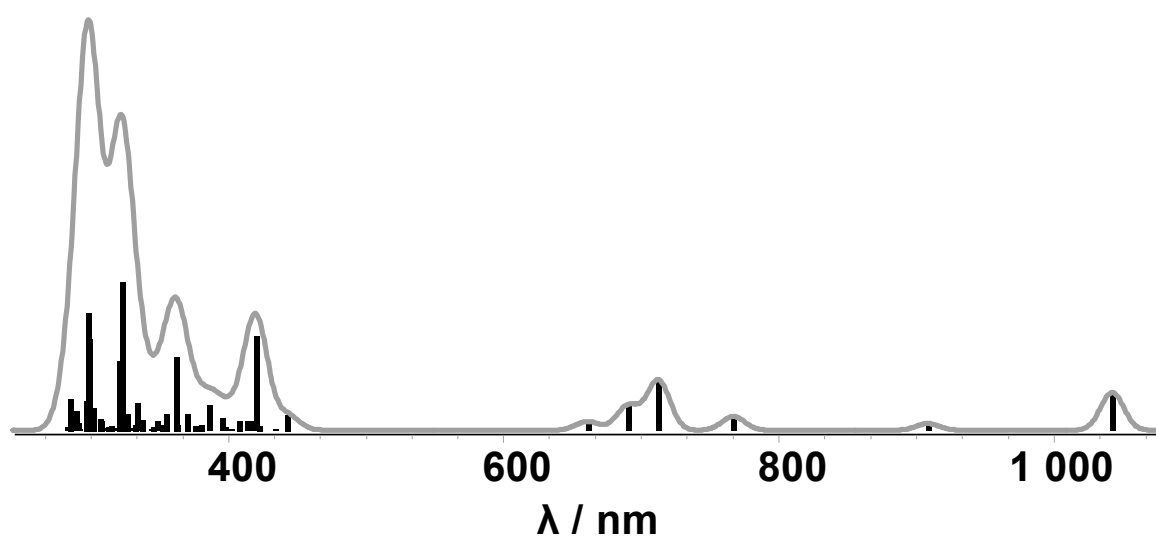



**Figure S27.** Calculated TD-DFT spectrum with discrete transitions of  $[\text{Cr}(\text{C}-\text{C})(\text{CO})_4]^-$ .

**Table S9.** Selected MO energies of  $[\text{Cr}(\text{C}-\text{C})(\text{CO})_4]^-$ .

| $[\text{Cr}(\text{C}-\text{C})(\text{CO})_4]$ |             |
|-----------------------------------------------|-------------|
| MO                                            | Energy / eV |
| $\alpha$ -HOMO-3                              | -5.0233     |
| $\alpha$ -HOMO-2                              | -4.9339     |
| $\beta$ -HOMO-2                               | -5.0087     |
| $\beta$ -HOMO-1                               | -4.7884     |
| $\alpha$ -LUMO+1                              | -0.4520     |
| $\alpha$ -LUMO+2                              | -0.2976     |
| $\alpha$ -LUMO+3                              | -0.1509     |
| $\alpha$ -LUMO+4                              | -0.1018     |
| $\alpha$ -LUMO+5                              | 0.0296      |
| $\alpha$ -LUMO+6                              | 0.7195      |
| $\alpha$ -LUMO+8                              | 0.9970      |
| $\alpha$ -LUMO+10                             | 1.3273      |

**Table S10.** XYZ coordinates of optimized  $[\text{Cr}(\text{C}-\text{C})(\text{CO})_4]^-$ .

|    | x               | y               | z              |
|----|-----------------|-----------------|----------------|
| Cr | 1.003091865399  | 10.144308109284 | 4.920620955770 |
| N  | -0.327529613304 | 11.225048571129 | 3.556597075598 |
| C  | 2.304260792897  | 11.157578850925 | 3.660889243339 |
| C  | 2.300027319261  | 9.396995879807  | 5.968236897578 |
| C  | -0.364731194992 | 9.394525104065  | 5.895184777627 |
| C  | 1.036980981727  | 8.588233261823  | 3.857503224277 |
| C  | 1.022708211846  | 11.703966211450 | 5.989811553496 |
| C  | 0.295958421057  | 12.073713175478 | 2.652694018438 |
| C  | -1.659205523688 | 11.179635670584 | 3.580707084696 |
| C  | 1.703000946840  | 12.027859460950 | 2.747089960653 |
| N  | 3.620330589328  | 11.346991047963 | 3.481090056778 |
| O  | 3.123885089854  | 8.918171908384  | 6.638880517296 |
| O  | -1.212475404048 | 8.89015251422   | 6.518466812216 |
| O  | 1.066078887157  | 7.592487662849  | 3.271722327061 |
| O  | 1.050292661236  | 12.659830542034 | 6.635347014676 |
| C  | -0.490466987621 | 12.854463965926 | 1.768009516708 |
| C  | -2.478828931017 | 11.927592514150 | 2.749422737846 |

|   |                 |                 |                |
|---|-----------------|-----------------|----------------|
| H | -2.093967690411 | 10.505914848922 | 4.307849677130 |
| N | 2.724170654548  | 12.669470884089 | 2.032572408242 |
| N | 3.954690278002  | 12.286059105824 | 2.525111858559 |
| C | 4.707546870760  | 10.657915295331 | 4.108296786689 |
| H | -0.009393636320 | 13.508594022799 | 1.056758953974 |
| C | -1.862569036132 | 12.781823124953 | 1.818984565904 |
| H | -3.553282620709 | 11.841686424139 | 2.827347214182 |
| C | 2.667145160162  | 14.009141791203 | 1.480040107077 |
| C | 5.126706771478  | 9.439322300204  | 3.557527579024 |
| C | 5.310442692325  | 11.221073247086 | 5.240728960465 |
| H | -2.460990166273 | 13.382418909927 | 1.145117848779 |
| H | 3.633630841160  | 14.236057282542 | 1.035288658247 |
| H | 2.447745900655  | 14.748756438091 | 2.259162216749 |
| H | 1.906200551001  | 14.069370185083 | 0.706030217281 |
| C | 6.256619703008  | 8.835848146394  | 4.108490210903 |
| C | 4.335745899669  | 8.768455060597  | 2.448855757613 |
| C | 4.710228895259  | 12.436002825361 | 5.927808482522 |
| C | 6.437379277906  | 10.580944381017 | 5.756019126606 |
| H | 6.613771265882  | 7.898076612775  | 3.704977147245 |
| C | 6.921021899080  | 9.414074760809  | 5.181307457013 |
| H | 3.296769147441  | 9.056634710685  | 2.600443842596 |
| C | 4.742399702485  | 9.250507472730  | 1.048308264630 |
| C | 4.397384375359  | 7.241944490694  | 2.523087684508 |
| H | 3.636211725899  | 12.386644482679 | 5.749124553782 |
| C | 5.213370240599  | 13.762549407850 | 5.342981379669 |
| C | 4.923123382583  | 12.420948340955 | 7.443912235763 |
| H | 6.932463045209  | 10.986651054147 | 6.627426521221 |
| H | 7.798111999138  | 8.931635479419  | 5.595696167752 |
| H | 4.140486996235  | 8.742109223441  | 0.291554334159 |
| H | 5.793576962160  | 9.022564125236  | 0.851400090421 |
| H | 4.589006412587  | 10.324974654000 | 0.944829020697 |
| H | 3.667755185932  | 6.814650707018  | 1.833535552300 |
| H | 4.166585182340  | 6.879723256398  | 3.526079132096 |
| H | 5.380544248422  | 6.860917449993  | 2.237783551776 |
| H | 4.986462945283  | 13.828981270830 | 4.278929496535 |
| H | 6.293691966507  | 13.857493536625 | 5.484932206895 |
| H | 4.731532285160  | 14.599516481732 | 5.853806569160 |
| H | 4.629356460343  | 11.464666923525 | 7.879966768611 |
| H | 4.319770125660  | 13.204817569911 | 7.904645122493 |
| H | 5.965277987676  | 12.613826526761 | 7.708989496680 |

## S6.20 TD-DFT Calculations of $[\text{Mo}(\text{C}-\text{C})(\text{CO})_4]$ and $[\text{Mo}(\text{C}-\text{C})(\text{CO})_4]^-$

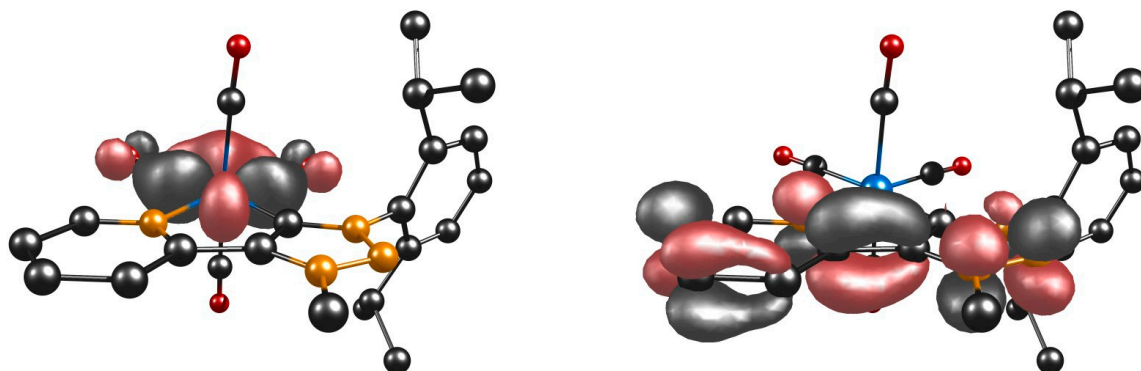

**Figure S28.** HOMO (left) and LUMO (right) of complex  $[\text{Mo}(\text{C}-\text{C})(\text{CO})_4]$ .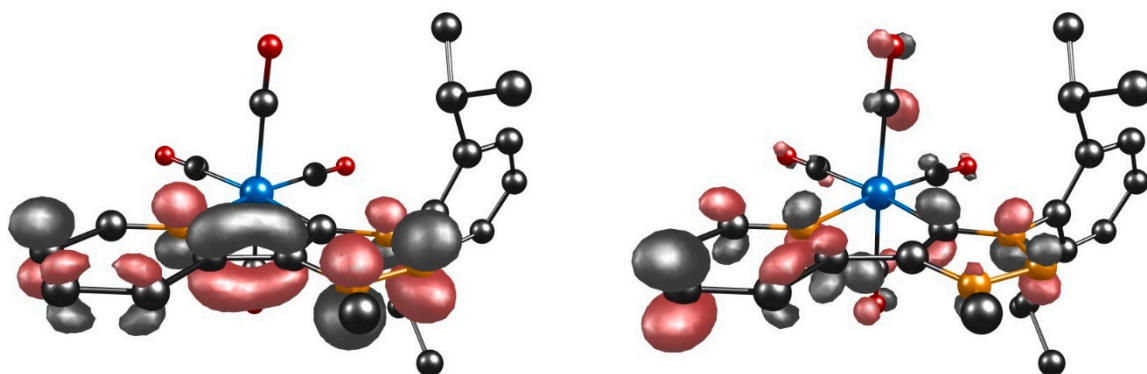**Figure S29.**  $\alpha$ -HOMO (left) and  $\alpha$ -LUMO (right) of complex  $[\text{Mo}(\text{C}-\text{C})(\text{CO})_4]^-$ .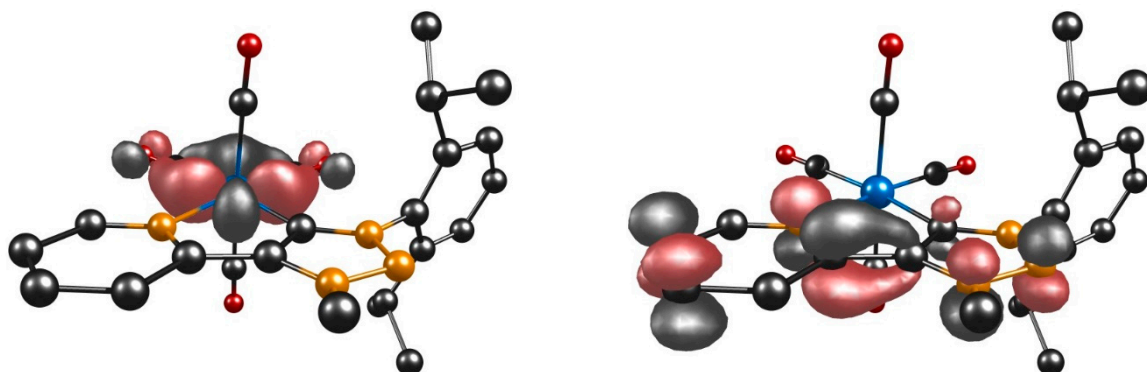**Figure S30.**  $\beta$ -HOMO (left) and  $\beta$ -LUMO (right) of complex  $[\text{Mo}(\text{C}-\text{C})(\text{CO})_4]^-$ .**Table S11.** Energies and compositions of selected orbitals.

| MO                                                                     | Energy<br>/ eV |
|------------------------------------------------------------------------|----------------|
| $[\text{Mo}(\text{C} - \text{C})(\text{CO})_4]_{\text{HOMO}}$          | -5.1001        |
| $[\text{Mo}(\text{C} - \text{C})(\text{CO})_4]_{\text{LUMO}}$          | -2.0257        |
| $[\text{Mo}(\text{C} - \text{C})(\text{CO})_4]_{\alpha\text{-HOMO}}^-$ | -2.3462        |
| $[\text{Mo}(\text{C} - \text{C})(\text{CO})_4]_{\alpha\text{-LUMO}}^-$ | -0.7250        |
| $[\text{Mo}(\text{C} - \text{C})(\text{CO})_4]_{\beta\text{-HOMO}}^-$  | -4.6769        |
| $[\text{Mo}(\text{C} - \text{C})(\text{CO})_4]_{\beta\text{-LUMO}}^-$  | -0.6866        |

**Table S12.** Selected experimental UV/vis data of [Mo(C-C)] together with selected TD-DFT calculations.

| State | $\lambda_{exp}(\lambda_{DFT})$ / nm | $\epsilon / 10^4 \text{ M}^{-1} \text{ cm}^{-1}(f)$ | Main contributing excitation (%)                                                                         |
|-------|-------------------------------------|-----------------------------------------------------|----------------------------------------------------------------------------------------------------------|
| 3     | 422 (507)                           | 0.38 (0.048)                                        | HOMO-2 $\rightarrow$ LUMO (78)<br>HOMO-1 $\rightarrow$ LUMO (18)                                         |
| 4     | 354 (373)                           | 0.54 (0.032)                                        | HOMO $\rightarrow$ LUMO+1 (33)<br>HOMO $\rightarrow$ LUMO+2 (58)                                         |
| 10    | 305 (330)                           | 0.94 (0.070)                                        | HOMO-2 $\rightarrow$ LUMO+1 (45)<br>HOMO-2 $\rightarrow$ LUMO+4 (16)<br>HOMO-1 $\rightarrow$ LUMO+1 (15) |

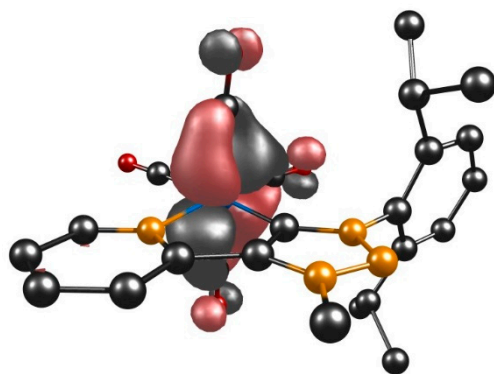

HOMO-2

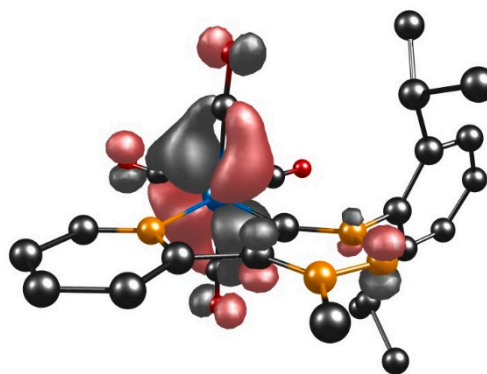

HOMO-1

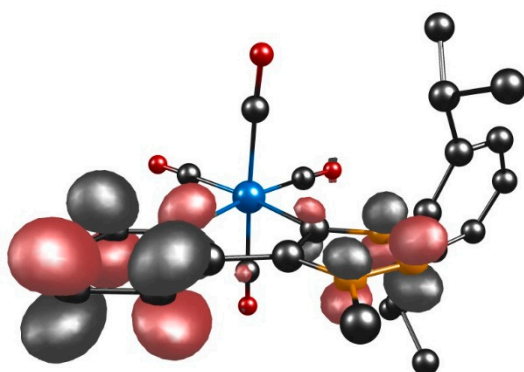

LUMO+1

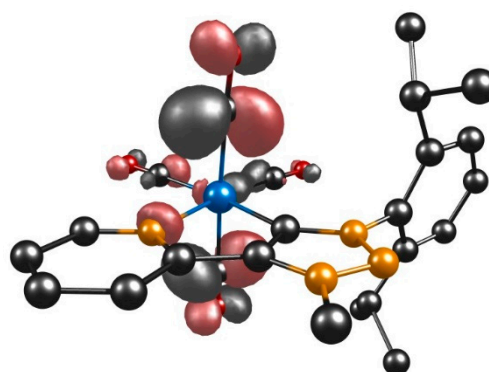

LUMO+2

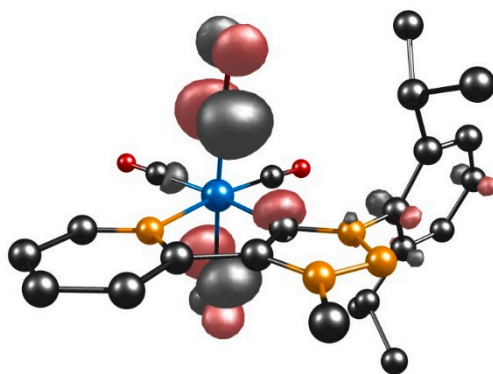

LUMO+4

**Figure S31.** Involved TD-DFT orbitals of complex  $[\text{Mo}(\text{C}-\text{C})(\text{CO})_4]$ .**Table S13.** Selected experimental UV/vis data of  $[\text{Mo}(\text{C}-\text{C})(\text{CO})_4]^-$  together with selected TD-DFT calculations.

| State | $\lambda_{exp}(\lambda_{DFT})$ / nm | $\epsilon$ / $\text{M}^{-1} \text{cm}^{-1}(f)$ | Main contributing excitation (%)                           |
|-------|-------------------------------------|------------------------------------------------|------------------------------------------------------------|
| 2     | 1300 (1262)                         | 0.07 (0.003)                                   | $\alpha\text{-HOMO} \rightarrow \alpha\text{-LUMO}+1$ (86) |
| 1     | 1300 (1096)                         | 0.07 (0.029)                                   | $\alpha\text{-HOMO} \rightarrow \alpha\text{-LUMO}+1$ (93) |
| 3     | 911 (950)                           | 0.07 (0.002)                                   | $\alpha\text{-HOMO} \rightarrow \alpha\text{-LUMO}+2$ (86) |
| 5     | 911 (852)                           | 0.07 (0.006)                                   | $\alpha\text{-HOMO} \rightarrow \alpha\text{-LUMO}+3$ (22) |
|       |                                     |                                                | $\alpha\text{-HOMO} \rightarrow \alpha\text{-LUMO}+5$ (71) |
| 4     | 911 (761)                           | 0.07 (0.032)                                   | $\alpha\text{-HOMO} \rightarrow \alpha\text{-LUMO}+2$ (13) |
|       |                                     |                                                | $\alpha\text{-HOMO} \rightarrow \alpha\text{-LUMO}+3$ (22) |
| 10    | 435 (457)                           | 0.49 (0.008)                                   | $\alpha\text{-HOMO} \rightarrow \alpha\text{-LUMO}+7$ (70) |

|    |           |              |                                                                                                                                                                                                                            |
|----|-----------|--------------|----------------------------------------------------------------------------------------------------------------------------------------------------------------------------------------------------------------------------|
| 15 | 435 (408) | 0.49 (0.016) | $\alpha$ -HOMO-2 $\rightarrow$ $\alpha$ -LUMO+2 (14)<br>$\beta$ -HOMO-1 $\rightarrow$ $\beta$ -LUMO (22)<br>$\beta$ -HOMO-1 $\rightarrow$ $\beta$ -LUMO+2 (29)                                                             |
| 18 | 340 (402) | 1.14 (0.037) | $\beta$ -HOMO-2 $\rightarrow$ $\beta$ -LUMO (14)<br>$\beta$ -HOMO-1 $\rightarrow$ $\beta$ -LUMO (39)                                                                                                                       |
| 30 | 340 (367) | 1.14 (0.053) | $\alpha$ -HOMO-3 $\rightarrow$ $\alpha$ -LUMO (22)<br>$\alpha$ -HOMO-3 $\rightarrow$ $\alpha$ -LUMO+1 (22)<br>$\alpha$ -HOMO-3 $\rightarrow$ $\alpha$ -LUMO+3 (22)<br>$\alpha$ -HOMO-3 $\rightarrow$ $\alpha$ -LUMO+3 (22) |

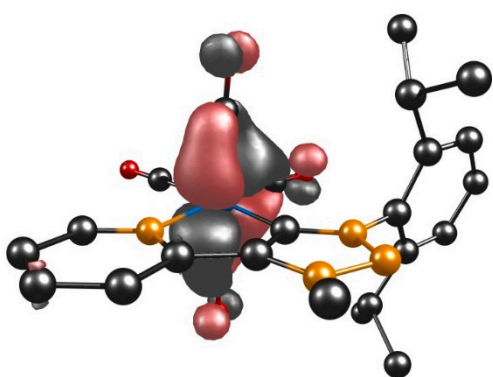 $\alpha$ -HOMO-3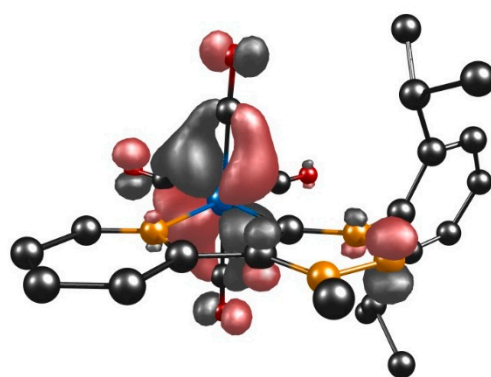 $\alpha$ -HOMO-2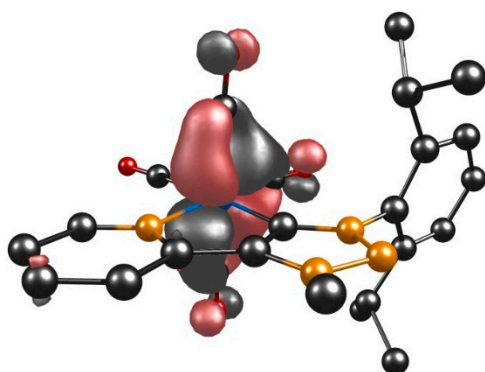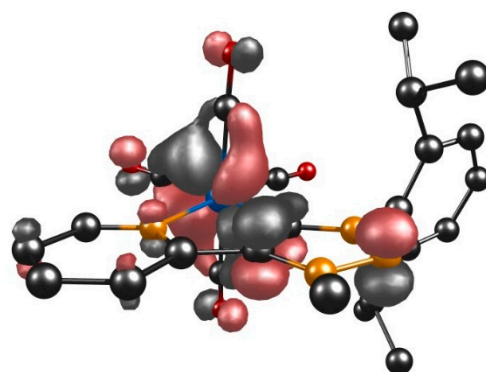

$\beta$ -HOMO-2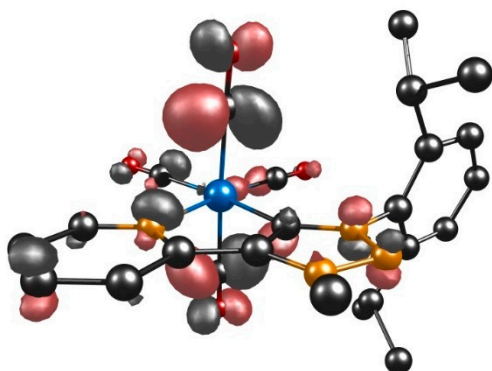 $\beta$ -HOMO-1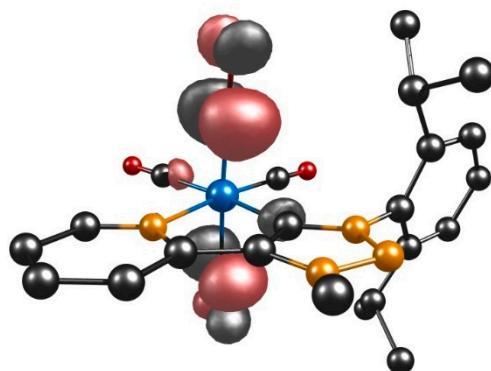 $\alpha$ -LUMO+1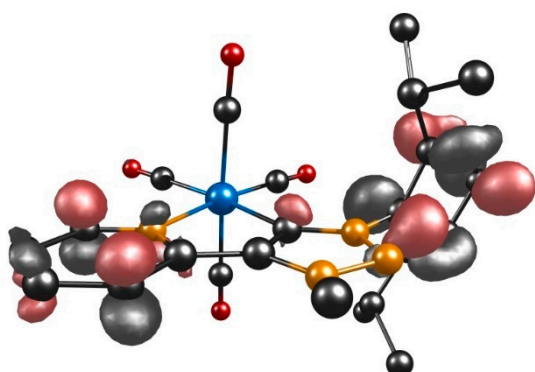 $\alpha$ -LUMO+2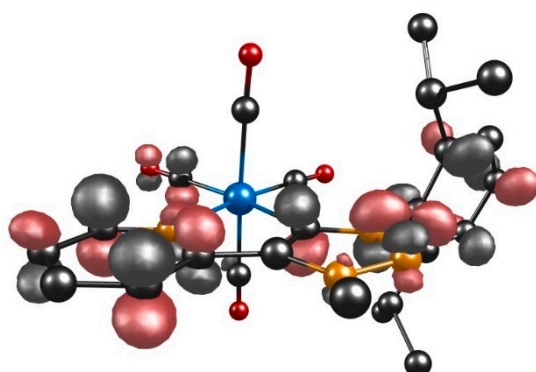 $\alpha$ -LUMO+3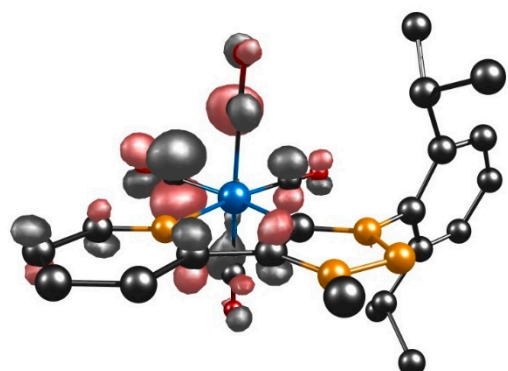 $\alpha$ -LUMO+5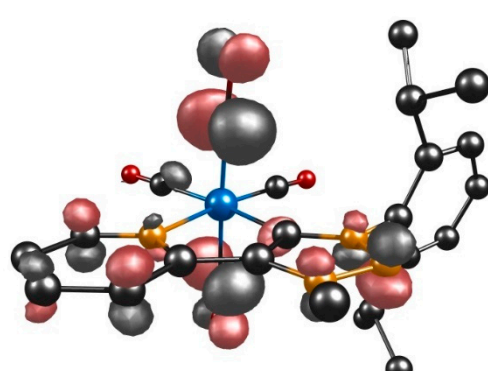



$\alpha$ -LUMO+7 $\beta$ -LUMO+2**Figure S32.** Involved TD-DFT orbitals of complex  $[\text{Mo}(\text{C-C})(\text{CO})_4]^-$ .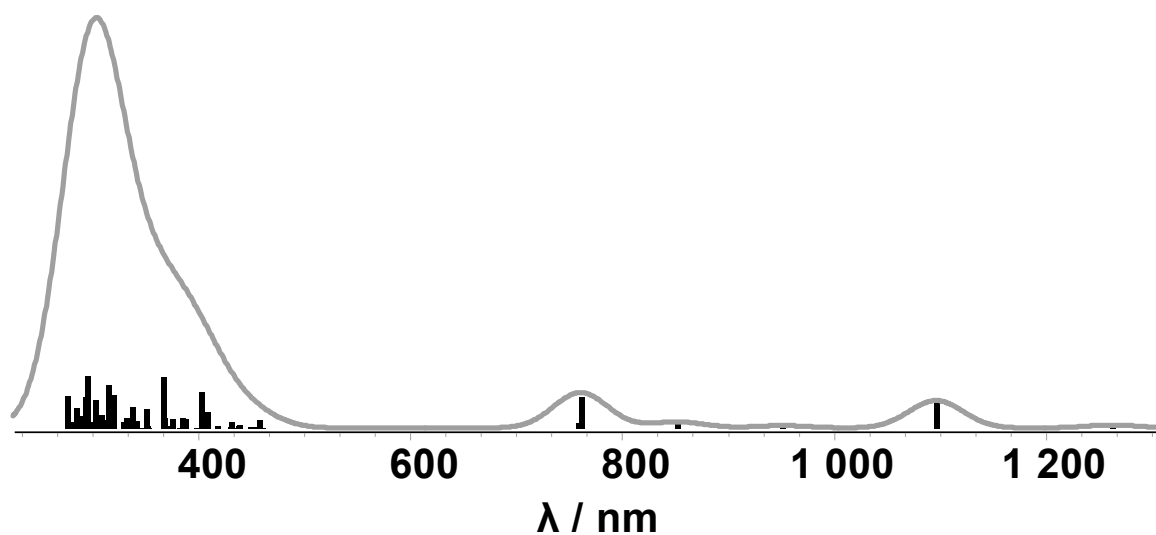**Figure S33.** Calculated TD-DFT spectrum with discrete transitions of  $[\text{Mo}(\text{C-C})(\text{CO})_4]^-$ .**Table S14.** Selected MO energies of  $[\text{Mo}(\text{C-C})(\text{CO})_4]$  and  $[\text{Mo}(\text{C-C})(\text{CO})_4]^-$ .

| $[\text{Mo}(\text{C-C})(\text{CO})_4]$ |             | $[\text{Mo}(\text{C-C})(\text{CO})_4]^-$ |             |
|----------------------------------------|-------------|------------------------------------------|-------------|
| MO                                     | Energy / eV | MO                                       | Energy / eV |
| HOMO-2                                 | -5.3710     | $\alpha$ -HOMO-3                         | -4.8700     |
| HOMO-1                                 | -5.3161     | $\alpha$ -HOMO-2                         | -4.6771     |
| LUMO+1                                 | -1.3513     | $\beta$ -HOMO-2                          | -4.9296     |
| LUMO+2                                 | -1.0433     | $\beta$ -HOMO-1                          | -4.7613     |



|        |         |                  |         |
|--------|---------|------------------|---------|
| LUMO+4 | −0.6818 | $\alpha$ -LUMO+1 | −0.6687 |
|        |         | $\alpha$ -LUMO+2 | −0.3627 |
|        |         | $\alpha$ -LUMO+3 | −0.2927 |
|        |         | $\alpha$ -LUMO+5 | −0.0365 |
|        |         | $\alpha$ -LUMO+7 | 0.7661  |
|        |         | $\beta$ -LUMO+2  | −0.3680 |

**Table S15.** XYZ coordinates of optimized [Mo(C–C)(CO)<sub>4</sub>].

|    | x              | y              | z               |
|----|----------------|----------------|-----------------|
| Mo | 5.668613958431 | 4.650569521145 | 10.617888820018 |
| N  | 6.901830430287 | 3.130103905852 | 11.894751730907 |
| C  | 4.245216226792 | 3.466603015282 | 11.807589734835 |
| C  | 7.227292556468 | 5.470029527646 | 9.673809841092  |
| C  | 4.381286167989 | 5.818767111593 | 9.716868051357  |
| C  | 5.828432400970 | 6.139498068707 | 12.004413652109 |
| C  | 5.413751519780 | 3.265370575462 | 9.131765563486  |
| C  | 6.219714151011 | 2.265020065428 | 12.695622508639 |
| C  | 8.235960732089 | 3.049566363961 | 11.863826684594 |
| C  | 4.787517757654 | 2.474066358776 | 12.623496700356 |
| N  | 2.911233189420 | 3.297462786678 | 11.997712402623 |
| O  | 8.139597428533 | 5.952035275930 | 9.138008765925  |
| O  | 3.587006686751 | 6.512365556998 | 9.223304263589  |

|   |                 |                 |                 |
|---|-----------------|-----------------|-----------------|
| O | 5.901873824219  | 7.052489454306  | 12.703000621655 |
| O | 5.222095058848  | 2.502489557293  | 8.292947186463  |
| C | 6.879235880261  | 1.310552100515  | 13.466044402173 |
| C | 8.956811362364  | 2.125882816812  | 12.605488517058 |
| H | 8.739915444187  | 3.752598838666  | 11.216529509699 |
| N | 3.749136227340  | 1.822178613032  | 13.218719753779 |
| N | 2.593466720460  | 2.317433153420  | 12.850945122019 |
| C | 1.827128317848  | 3.988281218921  | 11.349373890874 |
| H | 6.325670416683  | 0.631466478262  | 14.093750060572 |
| C | 8.263559644013  | 1.240678591348  | 13.419761107281 |
| H | 10.034907741996 | 2.104733301435  | 12.534614531645 |
| C | 3.756060140114  | 0.688541559132  | 14.135257786899 |
| C | 1.454642918027  | 5.246869461835  | 11.830545528929 |
| C | 1.206781751130  | 3.355050340446  | 10.267614171866 |
| H | 8.789107400494  | 0.504171881657  | 14.012260146749 |
| H | 2.724544222174  | 0.457664197806  | 14.380353398778 |
| H | 4.302799959251  | 0.957573571930  | 15.036179674690 |
| H | 4.224938956038  | -0.162233063672 | 13.645382335067 |
| C | 0.340855560938  | 5.842007298500  | 11.241081735879 |
| C | 2.258533092474  | 5.942953573559  | 12.913063768631 |
| C | 0.096146926376  | 3.992642871542  | 9.713541258751  |
| C | 1.749967307816  | 2.062445155923  | 9.683767924848  |
| H | 0.007066250449  | 6.810944020296  | 11.585067402743 |
| C | -0.343865673493 | 5.210821131244  | 10.210421728503 |
| H | 3.297256261827  | 5.649129611574  | 12.762184364496 |
| C | 1.851876097642  | 5.496037119326  | 14.325586309310 |
| C | 2.206553099173  | 7.466502975142  | 12.799199064672 |
| H | -0.421176056340 | 3.538594990354  | 8.879775253163  |
| C | 1.681381818492  | 2.049234170690  | 8.155052388361  |
| H | 2.805298785138  | 2.004285256538  | 9.954938518679  |
| C | 1.058275141373  | 0.818656745098  | 10.258331397842 |
| H | -1.209424347438 | 5.689707947957  | 9.769532363938  |
| H | 0.799563910067  | 5.723387454444  | 14.513682942111 |
| H | 2.450567369181  | 6.026401614254  | 15.068621093844 |
| H | 2.006978211570  | 4.425969978628  | 14.470888909791 |
| H | 2.445486834578  | 7.798429851497  | 11.787791768808 |
| H | 2.934815099314  | 7.905765030943  | 13.482450415577 |
| H | 1.224348598099  | 7.859836862432  | 13.069388721006 |
| H | 2.212898875312  | 1.176578899348  | 7.773005913636  |
| H | 2.141077738229  | 2.941940114590  | 7.728768233950  |
| H | 0.651276937612  | 1.990143946531  | 7.798651720501  |
| H | -0.010572590795 | 0.832925903267  | 10.030199244263 |
| H | 1.183634553852  | 0.760246176843  | 11.339376749811 |
| H | 1.488241006930  | -0.080978907123 | 9.812864341160  |

Table S16. XYZ coordinates of optimized  $[\text{Mo}(\text{C}-\text{C})(\text{CO})_4]^-$ .

|    | x              | y              | z               |
|----|----------------|----------------|-----------------|
| Mo | 5.645743103638 | 4.641522907645 | 10.642365229029 |
| N  | 6.898350211141 | 3.157502644334 | 11.893496614530 |
| C  | 4.224696385226 | 3.459659255204 | 11.862661263279 |
| C  | 7.186916065898 | 5.460048528618 | 9.684676430772  |
| C  | 4.344801571738 | 5.795993150927 | 9.740303529494  |
| C  | 5.813696810313 | 6.139595353416 | 12.010820049962 |
| C  | 5.391506043808 | 3.241147929012 | 9.173979589424  |
| C  | 6.193553498842 | 2.279666254158 | 12.719965328765 |
| C  | 8.231344625259 | 3.069793148280 | 11.860551265593 |
| C  | 4.794661953848 | 2.466584842233 | 12.677491507957 |
| N  | 2.904770818675 | 3.311882980912 | 12.048057736577 |
| O  | 8.093786430535 | 5.950131487818 | 9.136611006650  |
| O  | 3.550941711075 | 6.488641773892 | 9.237100661146  |

|   |                 |                 |                 |
|---|-----------------|-----------------|-----------------|
| O | 5.898267690258  | 7.064981002884  | 12.697107284937 |
| O | 5.214021352481  | 2.472078769728  | 8.334418952232  |
| C | 6.906442371117  | 1.329391799294  | 13.497085238908 |
| C | 8.974439331869  | 2.163617185455  | 12.595770970785 |
| H | 8.727428511021  | 3.771192724227  | 11.201489302997 |
| N | 3.743649776120  | 1.822970630071  | 13.328298518205 |
| N | 2.536321521298  | 2.318938657151  | 12.916402037719 |
| C | 1.838338378213  | 3.996974761598  | 11.380832504443 |
| H | 6.366263072889  | 0.649505694931  | 14.138352852003 |
| C | 8.275925277090  | 1.270828811048  | 13.437455095534 |
| H | 10.051470541797 | 2.146664342973  | 12.510498024792 |
| C | 3.734190134000  | 0.537760727635  | 13.990342716485 |
| C | 1.457852567261  | 5.267574956151  | 11.829023830105 |
| C | 1.209599420310  | 3.350342918052  | 10.309382348368 |
| H | 8.812734694650  | 0.543267559518  | 14.033324775268 |
| H | 2.722959599660  | 0.348781200766  | 14.342698932363 |
| H | 4.408126243340  | 0.539462121577  | 14.844880303580 |
| H | 4.028749219247  | -0.259115626236 | 13.299770852917 |
| C | 0.342520908363  | 5.851701037333  | 11.230137059880 |
| C | 2.264207015177  | 5.992686737940  | 12.890573611405 |
| C | 0.095214421792  | 3.972595988979  | 9.744782550663  |
| C | 1.760666573948  | 2.057210923681  | 9.735156702296  |
| H | 0.010589987398  | 6.828512251141  | 11.554518958623 |
| C | -0.348143581922 | 5.199744048779  | 10.216659606676 |
| H | 3.300367695573  | 5.691703779895  | 12.742167432893 |
| C | 1.864728601058  | 5.576728408315  | 14.314066506562 |
| C | 2.212721383580  | 7.513220199654  | 12.739704962032 |
| H | -0.422211954030 | 3.500011293397  | 8.920643879256  |
| C | 1.741640808957  | 2.061564815888  | 8.204676732962  |
| H | 2.804351457275  | 1.992960797565  | 10.044180378977 |
| C | 1.046468014985  | 0.812697596438  | 10.277583100169 |
| H | -1.216525158274 | 5.668176084707  | 9.769211723284  |
| H | 0.815494167059  | 5.816899429472  | 14.506999829048 |
| H | 2.472892488816  | 6.114877279351  | 15.044496080175 |
| H | 2.013475503411  | 4.507066338925  | 14.468401854047 |
| H | 2.448351436444  | 7.818952584208  | 11.719059500059 |
| H | 2.944389673951  | 7.969914328773  | 13.408199109642 |
| H | 1.232059856016  | 7.916072261703  | 13.003227557422 |
| H | 2.271503529483  | 1.185445026279  | 7.827297323601  |
| H | 2.229386326332  | 2.951885030955  | 7.805358252320  |
| H | 0.722845858729  | 2.025445964490  | 7.813593425514  |
| H | -0.017588577319 | 0.834394471918  | 10.025795361002 |
| H | 1.156532316674  | 0.751332735167  | 11.359990197246 |
| H | 1.479702313909  | -0.086697908223 | 9.833363549428  |

### S6.30 TD-DFT Calculations of $[\text{W}(\text{C}-\text{C})(\text{CO})_4]$ and $[\text{W}(\text{C}-\text{C})(\text{CO})_4]^-$

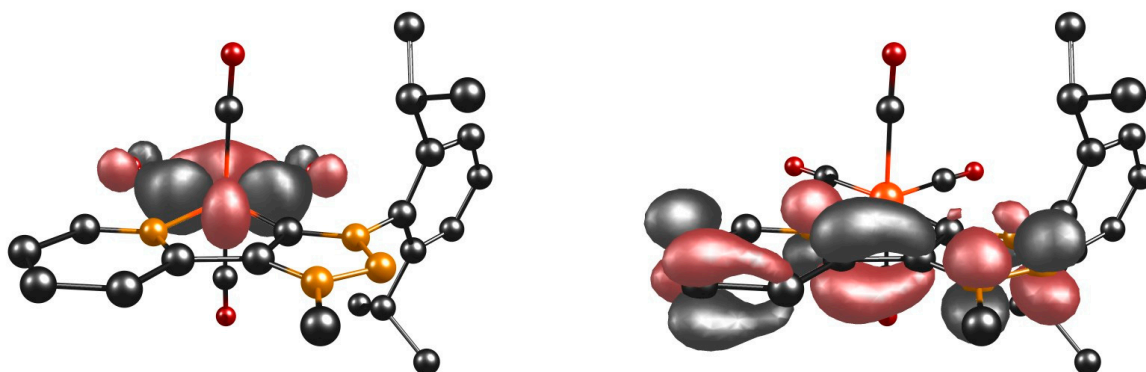

**Figure S34.** HOMO (left) and LUMO (right) of complex  $[\text{W}(\text{C}-\text{C})(\text{CO})_4]$ .

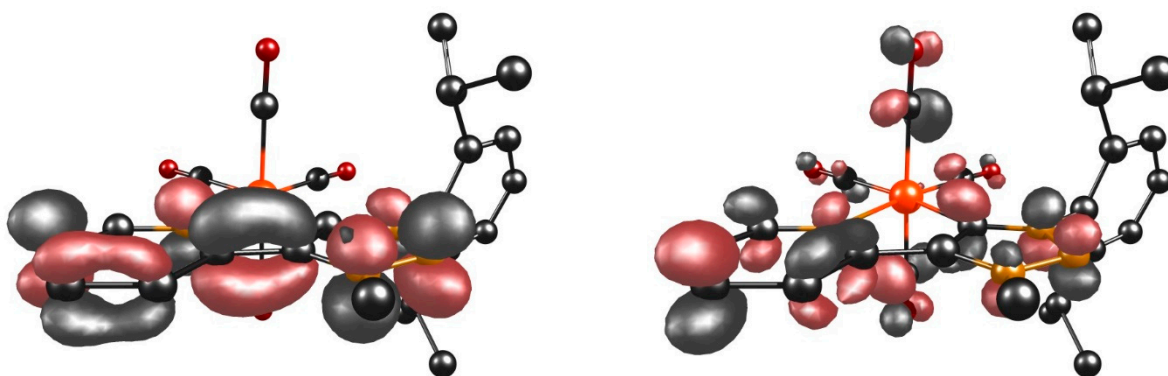

**Figure S35.**  $\alpha$ -HOMO (left) and  $\alpha$ -LUMO (right) of complex  $[\text{W}(\text{C}-\text{C})(\text{CO})_4]^-$ .

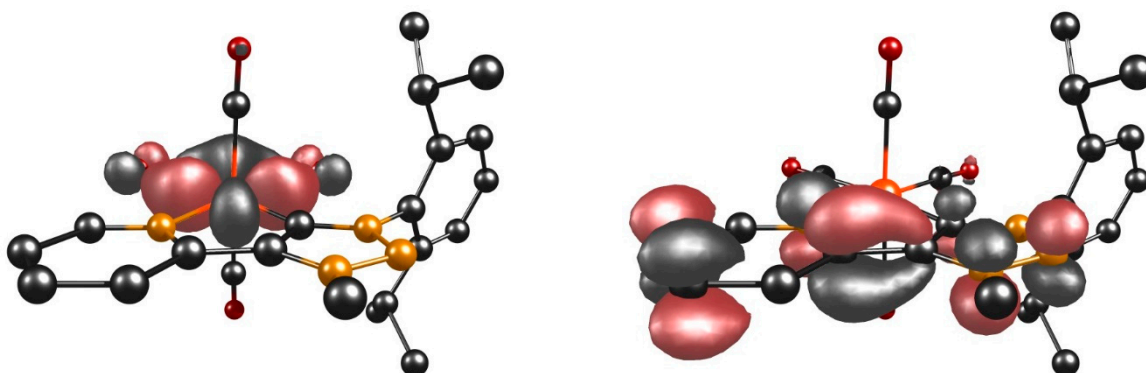

**Figure S36.**  $\beta$ -HOMO (left) and  $\beta$ -LUMO (right) of complex  $[\text{W}(\text{C}-\text{C})(\text{CO})_4]^-$ .

**Table S17.** Energies and compositions of selected orbitals.

| MO                                                                  | Energy /<br>eV |
|---------------------------------------------------------------------|----------------|
| $[\text{W}(\text{C}-\text{C})(\text{CO})_4]_{\text{HOMO}}$          | -5.0503        |
| $[\text{W}(\text{C}-\text{C})(\text{CO})_4]_{\text{LUMO}}$          | -2.0464        |
| $[\text{W}(\text{C}-\text{C})(\text{CO})_4]_{\alpha\text{-HOMO}}^-$ | -2.8466        |
| $[\text{W}(\text{C}-\text{C})(\text{CO})_4]_{\alpha\text{-LUMO}}^-$ | -0.9164        |
| $[\text{W}(\text{C}-\text{C})(\text{CO})_4]_{\beta\text{-HOMO}}^-$  | -4.7190        |
| $[\text{W}(\text{C}-\text{C})(\text{CO})_4]_{\beta\text{-LUMO}}^-$  | -1.0525        |

**Table S18.** Selected experimental UV/vis data of  $[\text{W}(\text{C}-\text{C})(\text{CO})_4]$  together with selected TD-DFT calculations.

| State | $\lambda_{\text{exp}}(\lambda_{\text{DFT}})$ / nm | $\epsilon / 10^4 \text{ M}^{-1} \text{ cm}^{-1}(f)$ | Main contributing excitation (%)                                                                         |
|-------|---------------------------------------------------|-----------------------------------------------------|----------------------------------------------------------------------------------------------------------|
| 3     | 421 (524)                                         | 0.51 (0.054)                                        | HOMO-2 $\rightarrow$ LUMO (86)<br>HOMO-1 $\rightarrow$ LUMO (8)                                          |
| 9     | 349 (407)                                         | 0.71 (0.013)                                        | HOMO-1 $\rightarrow$ LUMO+1 (64)<br>HOMO $\rightarrow$ LUMO+4 (8)                                        |
| 11    | 349 (398)                                         | 0.71 (0.018)                                        | HOMO-2 $\rightarrow$ LUMO+1 (32)<br>HOMO $\rightarrow$ LUMO+3 (36)<br>HOMO $\rightarrow$ LUMO+4 (20)     |
| 14    | 304 (336)                                         | 1.23 (0.076)                                        | HOMO-2 $\rightarrow$ LUMO+3 (23)<br>HOMO-1 $\rightarrow$ LUMO+3 (35)<br>HOMO-1 $\rightarrow$ LUMO+4 (12) |

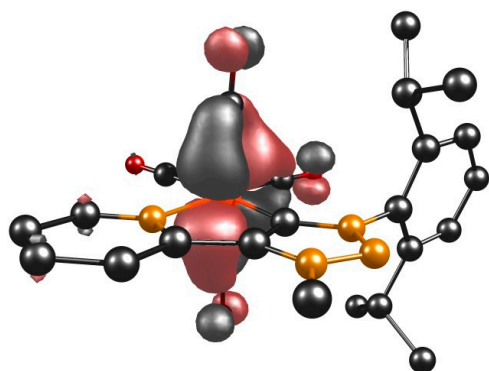

HOMO-2

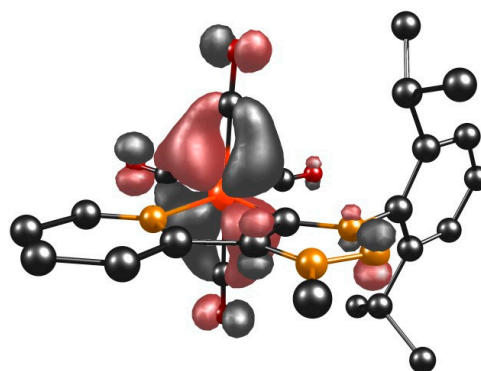

HOMO-1

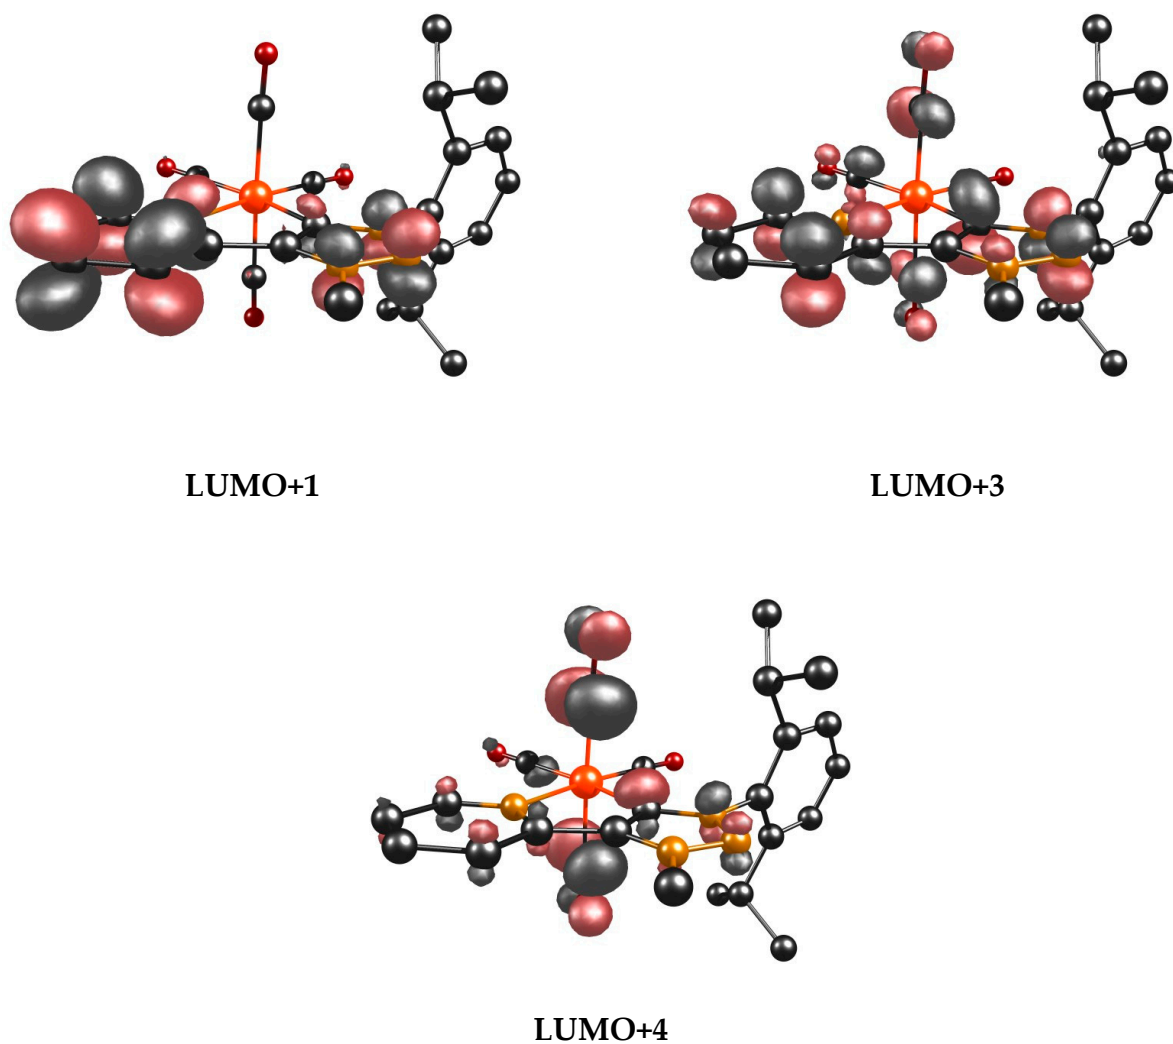

**Figure S37.** Involved TD-DFT orbitals of complex  $[\text{W}(\text{C}-\text{C})(\text{CO})_4]$ .

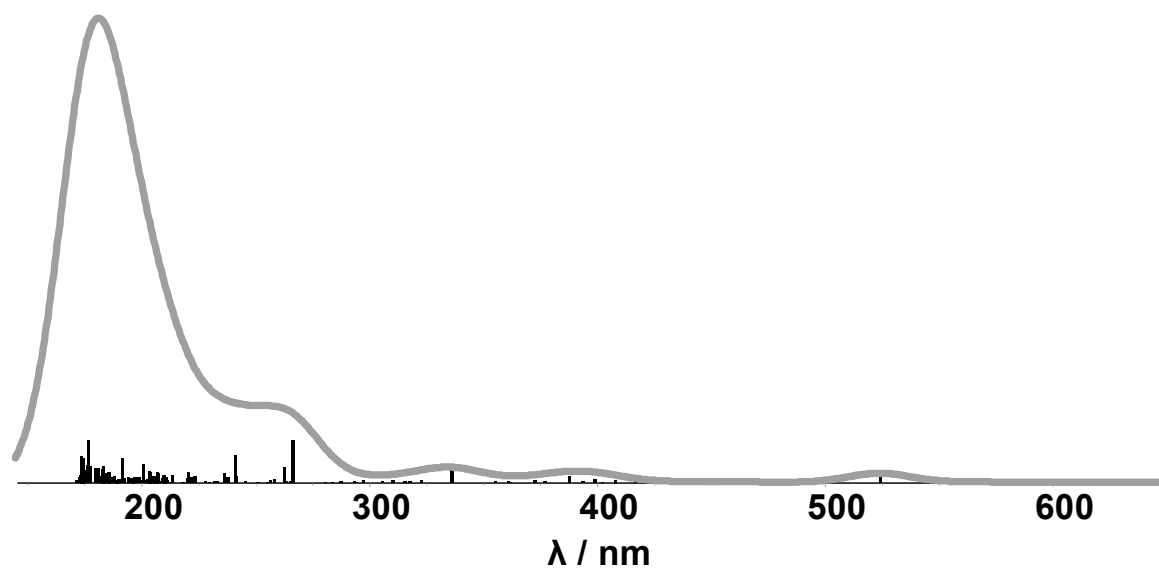

**Figure S38.** Calculated TD-DFT spectrum with discrete transitions of  $[\text{W}(\text{C}-\text{C})(\text{CO})_4]$ .

**Table S19.** Selected experimental UV/vis data of  $[\text{W}(\text{C}=\text{C})(\text{CO})_4]^-$  together with selected TD-DFT calculations.

| State | $\lambda_{\text{exp}}(\lambda_{\text{DFT}}) / \text{nm}$ | $\varepsilon / \text{M}^{-1} \text{cm}^{-1}(f)$ | Main contributing excitation (%)                                                                                                                                                                                                                   |
|-------|----------------------------------------------------------|-------------------------------------------------|----------------------------------------------------------------------------------------------------------------------------------------------------------------------------------------------------------------------------------------------------|
| 1     | 1583 (1105)                                              | 0.08 (0.029)                                    | $\alpha\text{-HOMO} \rightarrow \alpha\text{-LUMO}$ (85)                                                                                                                                                                                           |
| 6     | 1307 (861)                                               | 0.13 (0.007)                                    | $\alpha\text{-HOMO} \rightarrow \alpha\text{-LUMO}+3$ (82)<br>$\alpha\text{-HOMO} \rightarrow \alpha\text{-LUMO}+4$ (17)                                                                                                                           |
| 4     | 905 (761)                                                | 0.14 (0.029)                                    | $\alpha\text{-HOMO} \rightarrow \alpha\text{-LUMO}+2$ (59)<br>$\alpha\text{-HOMO} \rightarrow \alpha\text{-LUMO}+4$ (21)                                                                                                                           |
| 12    | 401 (450)                                                | 0.64 (0.005)                                    | $\alpha\text{-HOMO}-1 \rightarrow \alpha\text{-LUMO}+1$ (23)<br>$\alpha\text{-HOMO}-1 \rightarrow \alpha\text{-LUMO}+2$ (12)<br>$\beta\text{-HOMO} \rightarrow \beta\text{-LUMO}$ (28)<br>$\beta\text{-HOMO} \rightarrow \beta\text{-LUMO}+1$ (26) |
| 17    | 401 (420)                                                | 0.64 (0.031)                                    | $\beta\text{-HOMO}-2 \rightarrow \beta\text{-LUMO}$ (19)<br>$\beta\text{-HOMO}-1 \rightarrow \beta\text{-LUMO}$ (48)                                                                                                                               |
| 21    | 401 (399)                                                | 0.64 (0.010)                                    | $\alpha\text{-HOMO}-3 \rightarrow \alpha\text{-LUMO}$ (24)<br>$\alpha\text{-HOMO}-3 \rightarrow \alpha\text{-LUMO}+1$ (13)<br>$\beta\text{-HOMO}-1 \rightarrow \beta\text{-LUMO}+2$ (17)                                                           |
| 26    | 351 (382)                                                | 1.28 (0.011)                                    | $\alpha\text{-HOMO}-3 \rightarrow \alpha\text{-LUMO}+2$ (27)<br>$\alpha\text{-HOMO}-2 \rightarrow \alpha\text{-LUMO}+2$ (26)<br>$\beta\text{-HOMO}-2 \rightarrow \beta\text{-LUMO}+2$ (17)                                                         |
| 28    | 335 (380)                                                | 1.45 (0.062)                                    | $\alpha\text{-HOMO}-3 \rightarrow \alpha\text{-LUMO}$ (35)<br>$\alpha\text{-HOMO}-2 \rightarrow \alpha\text{-LUMO}+1$ (18)<br>$\beta\text{-HOMO}-2 \rightarrow \beta\text{-LUMO}$ (17)                                                             |

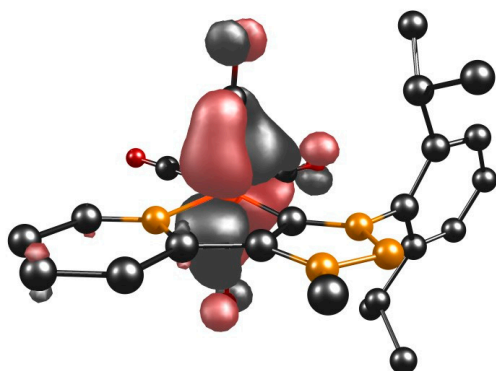

$\alpha\text{-HOMO}-3$

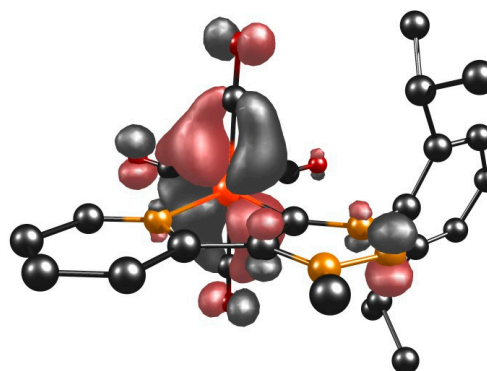

$\alpha\text{-HOMO}-2$



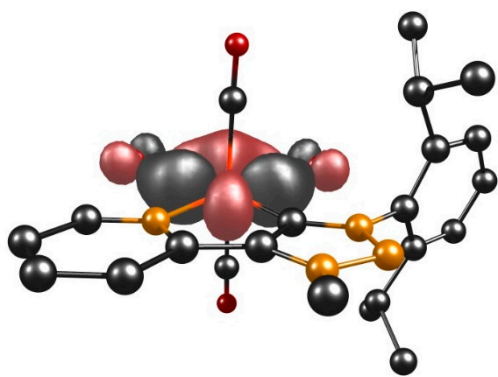

$\alpha$ -HOMO-1

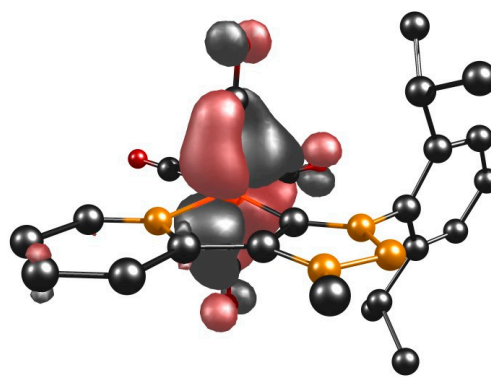

$\beta$ -HOMO-2

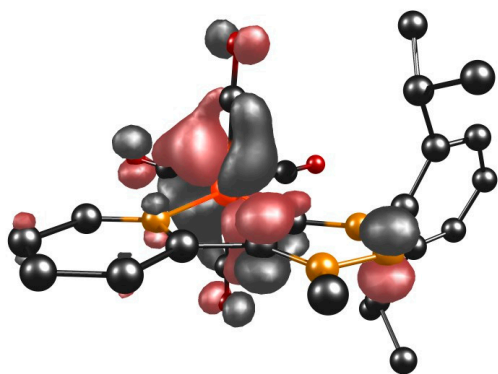

$\beta$ -HOMO-1

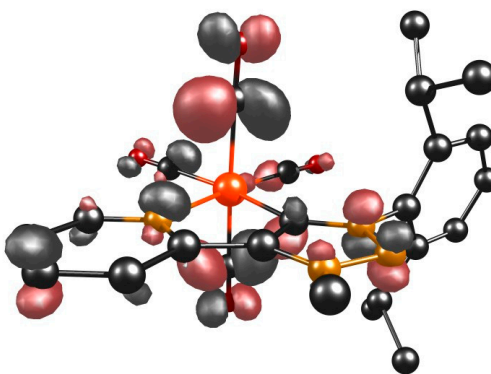

$\alpha$ -LUMO+1

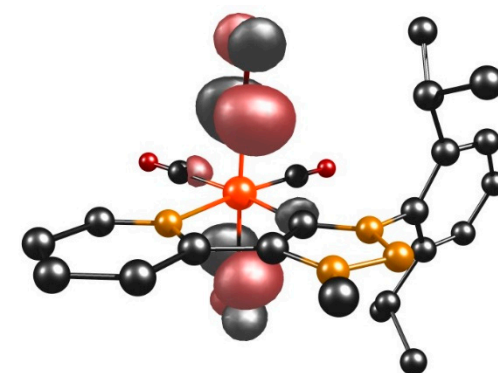

$\alpha$ -LUMO+2

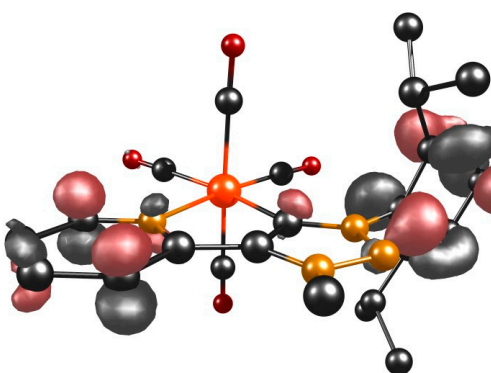

$\alpha$ -LUMO+3



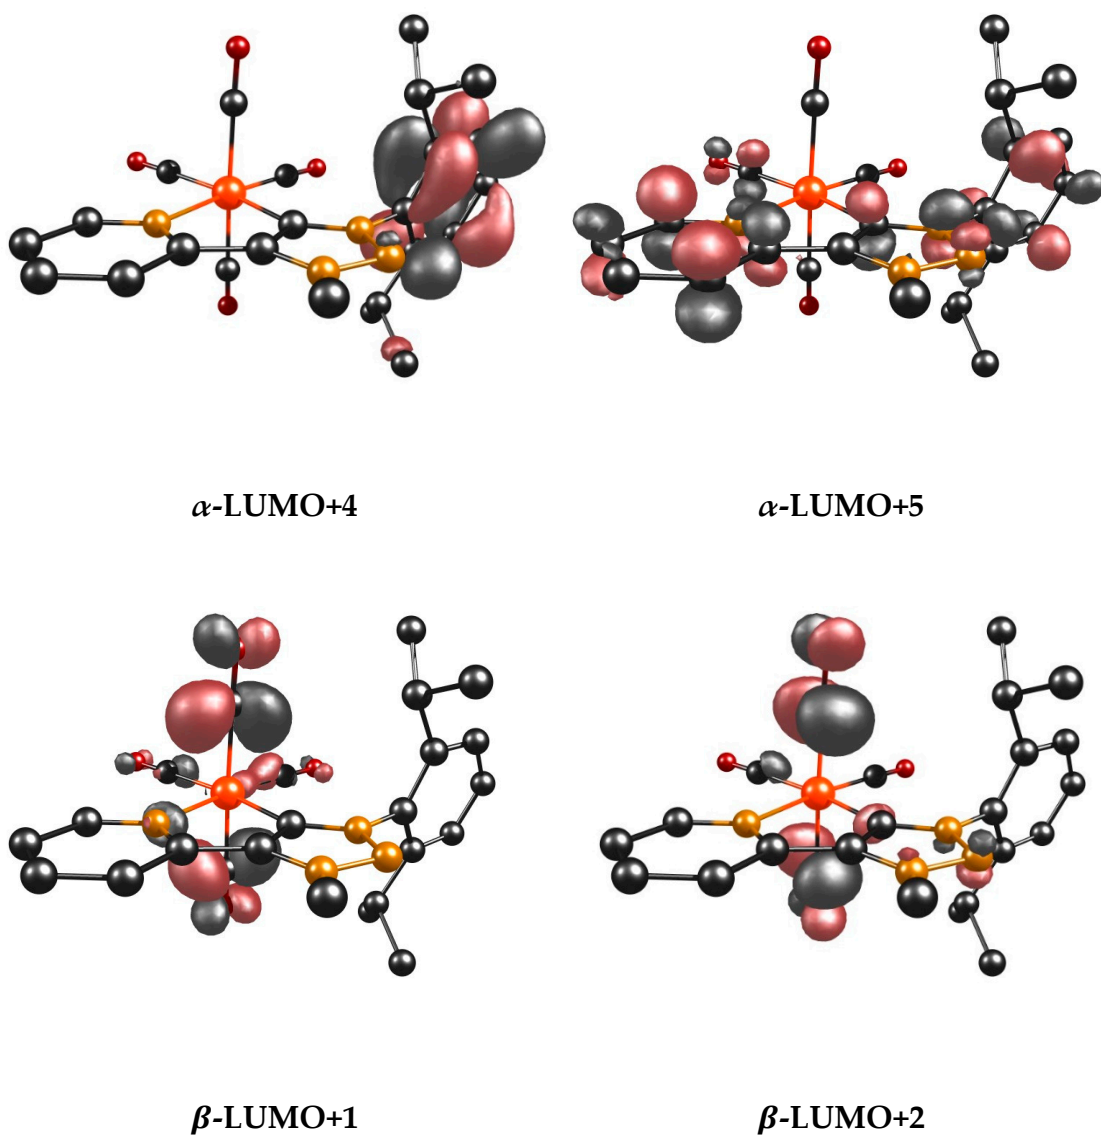

**Figure S39.** Involved TD-DFT orbitals of complex  $[\text{W}(\text{C}-\text{C})(\text{CO})_4]^-$ .

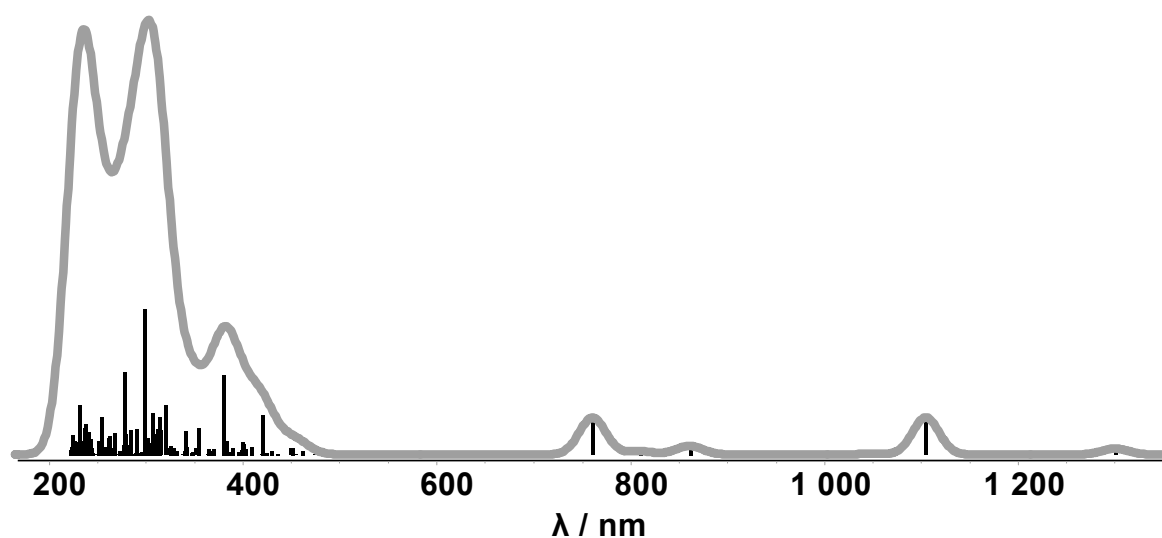

**Figure S40.** Calculated TD-DFT spectrum with discrete transitions of  $[\text{W}(\text{C}-\text{C})(\text{CO})_4]^-$ .

**Table S20.** Selected MO energies of  $[\text{W}(\text{C}-\text{C})(\text{CO})_4]$  and  $[\text{W}(\text{C}-\text{C})(\text{CO})_4]^-$ .

| $[\text{W}(\text{C}-\text{C})(\text{CO})_4]$ |             | $[\text{W}(\text{C}-\text{C})(\text{CO})_4]^-$ |             |
|----------------------------------------------|-------------|------------------------------------------------|-------------|
| MO                                           | Energy / eV | MO                                             | Energy / eV |
| HOMO-2                                       | -5.3384     | $\alpha$ -HOMO-3                               | -5.0850     |
| HOMO-1                                       | -5.2955     | $\alpha$ -HOMO-2                               | -5.0334     |
| LUMO+1                                       | -1.0686     | $\alpha$ -HOMO-1                               | -4.8048     |
| LUMO+3                                       | -0.8123     | $\beta$ -HOMO-2                                | -5.0437     |
| LUMO+4                                       | -0.7633     | $\beta$ -HOMO-1                                | -4.8739     |
|                                              |             | $\alpha$ -LUMO+1                               | -0.9098     |
|                                              |             | $\alpha$ -LUMO+2                               | -0.6169     |
|                                              |             | $\alpha$ -LUMO+3                               | -0.3078     |
|                                              |             | $\alpha$ -LUMO+4                               | -0.2644     |
|                                              |             | $\beta$ -LUMO+1                                | -0.9032     |
|                                              |             | $\beta$ -LUMO+2                                | -0.6160     |

**Table S21.** XYZ coordinates of optimized [W(C–C)(CO)<sub>4</sub>].

|   | x        | y        | z       |
|---|----------|----------|---------|
| W | 0.93332  | 4.68088  | 4.90794 |
| N | -0.35288 | 3.12918  | 3.73599 |
| C | 2.29383  | 3.43006  | 3.71159 |
| C | -0.60342 | 5.55951  | 5.84979 |
| C | 2.25177  | 5.86958  | 5.76133 |
| C | 0.76953  | 6.08591  | 3.4228  |
| C | 1.16495  | 3.35401  | 6.45453 |
| C | 0.28155  | 2.23324  | 2.92699 |
| C | -1.68528 | 3.05705  | 3.8414  |
| N | 3.6195   | 3.25206  | 3.4755  |
| C | 1.71557  | 2.43278  | 2.9284  |
| O | -1.50776 | 6.06203  | 6.38782 |
| O | 3.05628  | 6.56881  | 6.2367  |
| O | 0.69554  | 6.92453  | 2.63473 |
| O | 1.32595  | 2.62118  | 7.32894 |
| C | -0.42303 | 1.26006  | 2.22379 |
| C | -2.44662 | 2.11308  | 3.17138 |
| H | -2.1511  | 3.78288  | 4.49179 |
| N | 3.89862  | 2.26555  | 2.61765 |
| C | 4.7147   | 3.92498  | 4.12501 |
| N | 2.72628  | 1.77279  | 2.29883 |
| H | 0.09398  | 0.55774  | 1.59025 |
| C | -1.80291 | 1.19889  | 2.34806 |
| H | -3.51905 | 2.09917  | 3.30479 |
| C | 5.12393  | 5.16957  | 3.64505 |
| C | 5.29619  | 3.29105  | 5.23221 |
| C | 2.6718   | 0.62785  | 1.39841 |
| H | -2.36351 | 0.44684  | 1.8095  |
| C | 6.21875  | 5.76269  | 4.27477 |
| C | 4.42875  | 5.86567  | 2.49159 |
| C | 6.38835  | 3.92454  | 5.82182 |
| C | 4.73533  | 1.99556  | 5.79384 |
| H | 2.08111  | 0.88664  | 0.52244 |
| H | 2.2246   | -0.2142  | 1.92289 |
| H | 3.68904  | 0.38914  | 1.10587 |
| H | 6.5757   | 6.72405  | 3.93026 |
| C | 6.8545   | 5.13966  | 5.33754 |
| H | 3.4963   | 5.339    | 2.29098 |
| C | 4.06656  | 7.31595  | 2.83654 |
| C | 5.28337  | 5.79691  | 1.21852 |
| H | 6.87347  | 3.4715   | 6.67507 |
| H | 3.67292  | 1.97005  | 5.54421 |
| C | 4.83891  | 1.92545  | 7.31881 |
| C | 5.38908  | 0.7541   | 5.16828 |
| H | 7.7051   | 5.61584  | 5.8096  |
| H | 4.95923  | 7.91824  | 3.01601 |
| H | 3.44341  | 7.3668   | 3.72747 |
| H | 3.51544  | 7.76586  | 2.00879 |
| H | 4.75216  | 6.25888  | 0.38329 |
| H | 5.51606  | 4.76399  | 0.95174 |
| H | 6.22642  | 6.33031  | 1.35924 |
| H | 4.42942  | 2.82038  | 7.78935 |
| H | 5.87384  | 1.80636  | 7.6463  |
| H | 4.27856  | 1.06288  | 7.68219 |
| H | 5.24733  | 0.72865  | 4.0884  |
| H | 4.94686  | -0.14899 | 5.5946  |
| H | 6.46139  | 0.74011  | 5.37961 |

**Table S22.** XYZ coordinates of optimized  $[\text{W}(\text{C}-\text{C})(\text{CO})_4]^-$ .

|   | x        | y        | z       |
|---|----------|----------|---------|
| W | 0.917    | 4.60166  | 4.94718 |
| N | -0.34296 | 3.13651  | 3.69144 |
| C | 2.32321  | 3.41771  | 3.7062  |
| C | -0.63944 | 5.4186   | 5.90097 |
| C | 2.22488  | 5.74849  | 5.87516 |
| C | 0.76007  | 6.13548  | 3.60407 |
| C | 1.1327   | 3.20752  | 6.43631 |
| C | 0.34733  | 2.25308  | 2.85166 |
| C | -1.67996 | 3.05963  | 3.72821 |
| N | 3.64147  | 3.2736   | 3.5022  |
| C | 1.74608  | 2.43061  | 2.88723 |
| O | -1.55852 | 5.90152  | 6.44162 |
| O | 3.01945  | 6.43343  | 6.39525 |
| O | 0.6793   | 7.08169  | 2.94197 |
| O | 1.27647  | 2.45429  | 7.29999 |
| C | -0.37882 | 1.31453  | 2.074   |
| C | -2.43234 | 2.16718  | 2.99085 |
| H | -2.16732 | 3.76052  | 4.39388 |
| N | 3.9984   | 2.29046  | 2.62421 |
| C | 4.71616  | 3.96248  | 4.15334 |
| N | 2.79052  | 1.78982  | 2.23478 |
| H | 0.15369  | 0.63345  | 1.42697 |
| C | -1.74753 | 1.26887  | 2.13856 |
| H | -3.50921 | 2.1621   | 3.08086 |
| C | 5.09367  | 5.22727  | 3.68818 |
| C | 5.35455  | 3.32259  | 5.22235 |
| C | 2.78162  | 0.54771  | 1.49706 |
| H | -2.29534 | 0.55071  | 1.54139 |
| C | 6.21655  | 5.81437  | 4.26983 |
| C | 4.28002  | 5.94254  | 2.62561 |
| C | 6.47565  | 3.9477   | 5.76979 |
| C | 4.81064  | 2.03139  | 5.80728 |
| H | 2.14033  | 0.6256   | 0.61995 |
| H | 2.43084  | -0.27343 | 2.12894 |
| H | 3.79867  | 0.34133  | 1.17275 |
| H | 6.54801  | 6.78691  | 3.93203 |
| C | 6.91576  | 5.16995  | 5.28221 |
| H | 3.24608  | 5.63416  | 2.77442 |
| C | 4.3199   | 7.46365  | 2.7746  |
| C | 4.68343  | 5.52708  | 1.20295 |
| H | 7.00236  | 3.48057  | 6.59117 |
| H | 3.76273  | 1.96575  | 5.51227 |
| C | 4.84956  | 2.04006  | 7.33713 |
| C | 5.51992  | 0.78721  | 5.25732 |
| H | 7.79018  | 5.64026  | 5.7159  |
| H | 5.29727  | 7.87336  | 2.50945 |
| H | 4.08345  | 7.76852  | 3.79538 |
| H | 3.58393  | 7.91405  | 2.10656 |
| H | 4.07444  | 6.06224  | 0.47095 |
| H | 4.539    | 4.45666  | 1.04912 |
| H | 5.73209  | 5.77095  | 1.0114  |
| H | 4.36134  | 2.92886  | 7.73954 |
| H | 5.87352  | 2.01177  | 7.71531 |
| H | 4.33035  | 1.16161  | 7.72404 |
| H | 5.40015  | 0.72572  | 4.17578 |
| H | 5.09192  | -0.11286 | 5.70528 |
| H | 6.58648  | 0.80979  | 5.49832 |

S6.40 TD-DFT Calculations of  $[\text{W}(\text{C}-\text{N})(\text{CO})_4]$  and  $[\text{W}(\text{C}-\text{N})(\text{CO})_4]^-$ 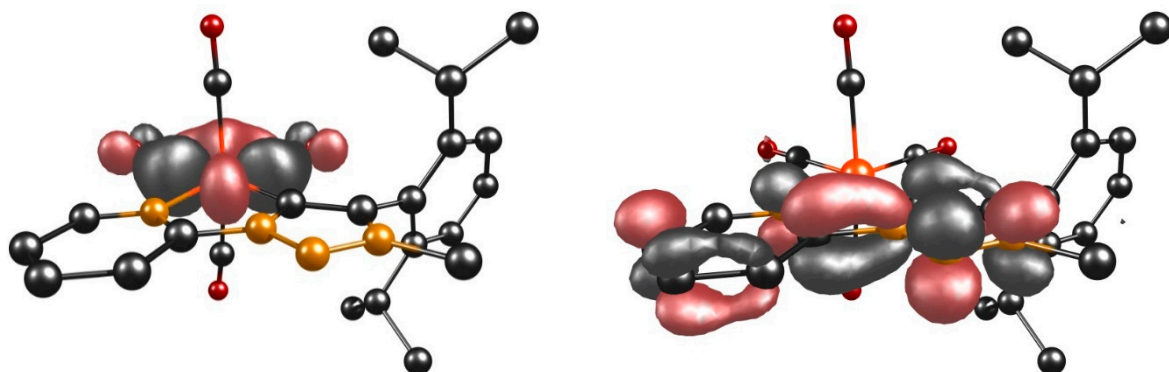

Figure S41. HOMO (left) and LUMO (right) of complex  $[\text{W}(\text{C}-\text{N})(\text{CO})_4]$ .

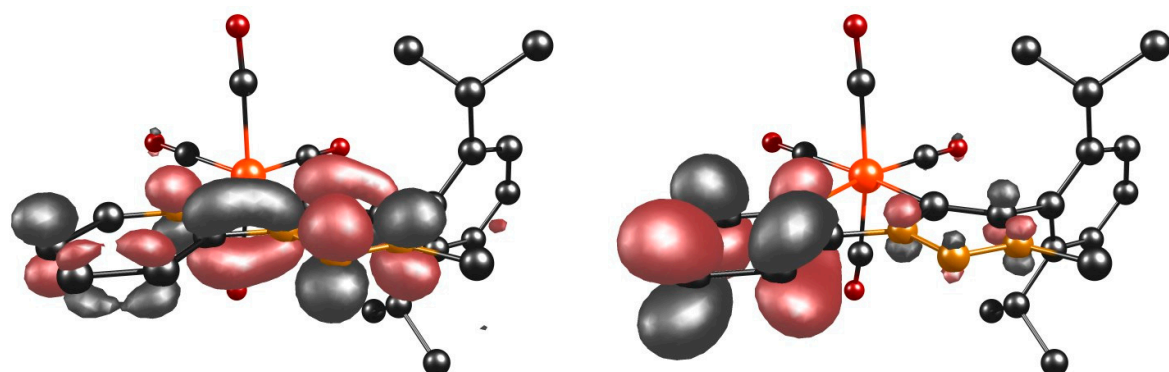

Figure S42.  $\alpha$ -HOMO (left) and  $\alpha$ -LUMO (right) of complex  $[\text{W}(\text{C}-\text{N})(\text{CO})_4]^-$ .

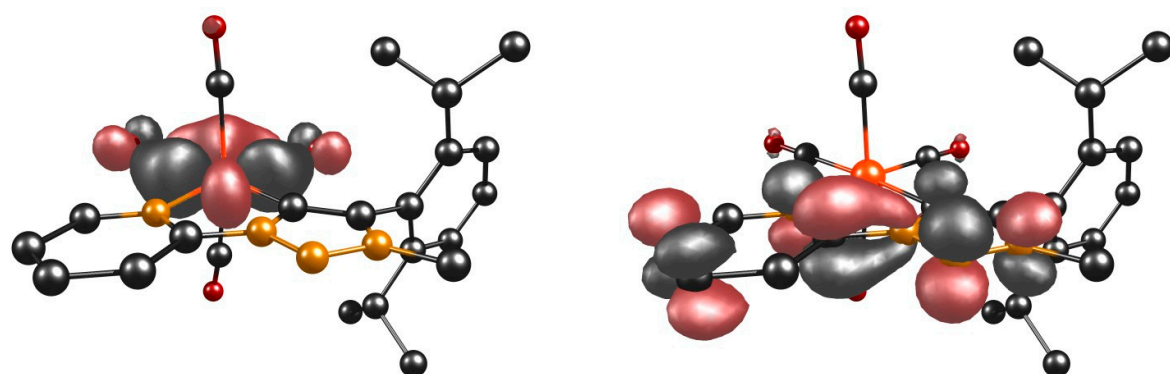

Figure S43.  $\beta$ -HOMO (left) and  $\beta$ -LUMO (right) of complex  $[\text{W}(\text{C}-\text{N})(\text{CO})_4]^-$ .

**Table S23.** Energies and compositions of selected orbitals.

| MO                                                                    | Energy /<br>eV |
|-----------------------------------------------------------------------|----------------|
| $[\text{W}(\text{C} - \text{N})(\text{CO})_4]_{\text{HOMO}}$          | -5.3143        |
| $[\text{W}(\text{C} - \text{N})(\text{CO})_4]_{\text{LUMO}}$          | -2.6455        |
| $[\text{W}(\text{C} - \text{N})(\text{CO})_4]_{\alpha\text{-HOMO}}^-$ | -2.9966        |
| $[\text{W}(\text{C} - \text{N})(\text{CO})_4]_{\alpha\text{-LUMO}}^-$ | -0.9720        |
| $[\text{W}(\text{C} - \text{N})(\text{CO})_4]_{\beta\text{-HOMO}}^-$  | -4.8301        |
| $[\text{W}(\text{C} - \text{N})(\text{CO})_4]_{\beta\text{-LUMO}}^-$  | -1.2443        |

**Table S24.** Selected experimental UV/vis data of  $[\text{W}(\text{C}-\text{N})(\text{CO})_4]$  together with selected TD-DFT calculations.

| State | $\lambda_{\text{exp}}(\lambda_{\text{DFT}}) / \text{nm}$ | $\epsilon / 10^4 \text{ M}^{-1} \text{ cm}^{-1}(f)$ | Main contributing excitation (%)                                   |
|-------|----------------------------------------------------------|-----------------------------------------------------|--------------------------------------------------------------------|
| 3     | 447 (534)                                                | 0.64 (0.079)                                        | HOMO-2 $\rightarrow$ LUMO (20)<br>HOMO-1 $\rightarrow$ LUMO (74)   |
| 10    | 374 (395)                                                | 0.51 (0.056)                                        | HOMO-2 $\rightarrow$ LUMO+1 (47)<br>HOMO $\rightarrow$ LUMO+3 (43) |
| 9     | 374 (393)                                                | 0.51 (0.035)                                        | HOMO-2 $\rightarrow$ LUMO+1 (36)<br>HOMO $\rightarrow$ LUMO+3 (55) |
| 15    | 301 (318)                                                | 0.93 (0.012)                                        | HOMO-1 $\rightarrow$ LUMO+4 (65)                                   |

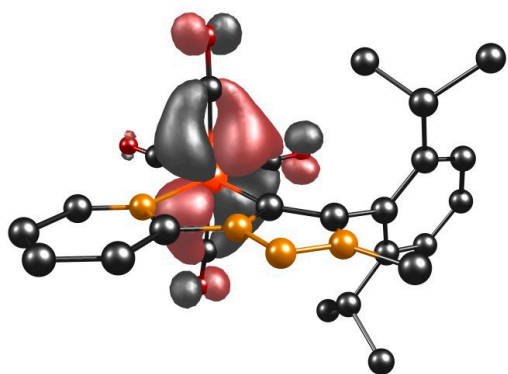

HOMO-2

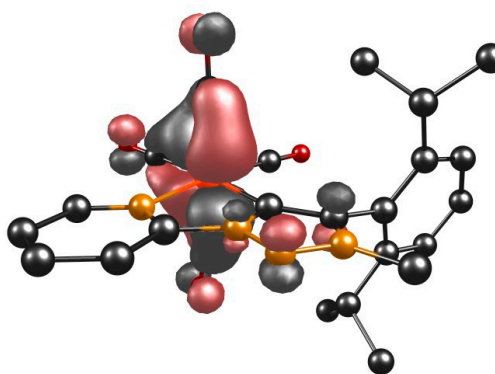

HOMO-1

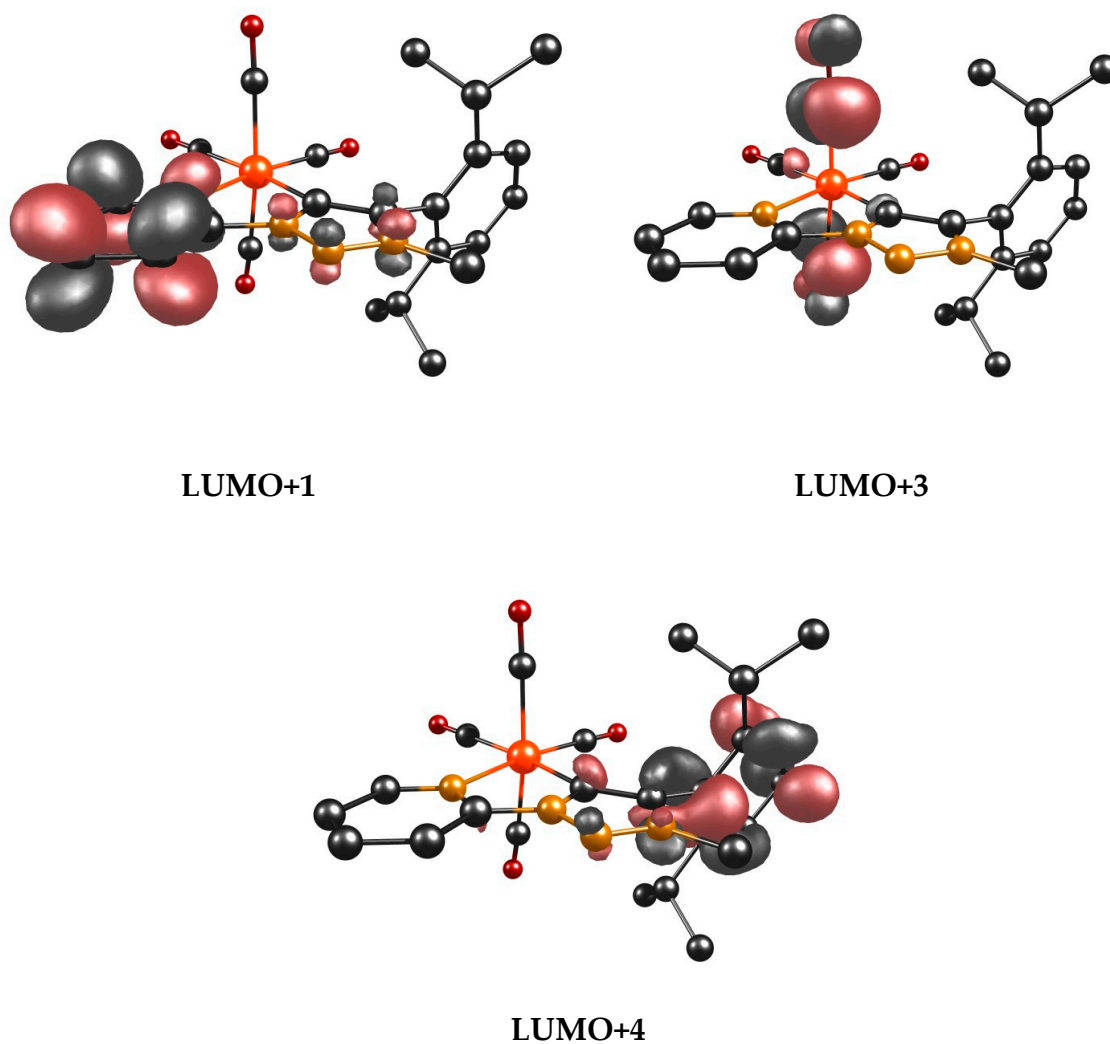

**Figure S44.** Involved TD-DFT orbitals of complex  $[\text{W}(\text{C-N})(\text{CO})_4]$ .

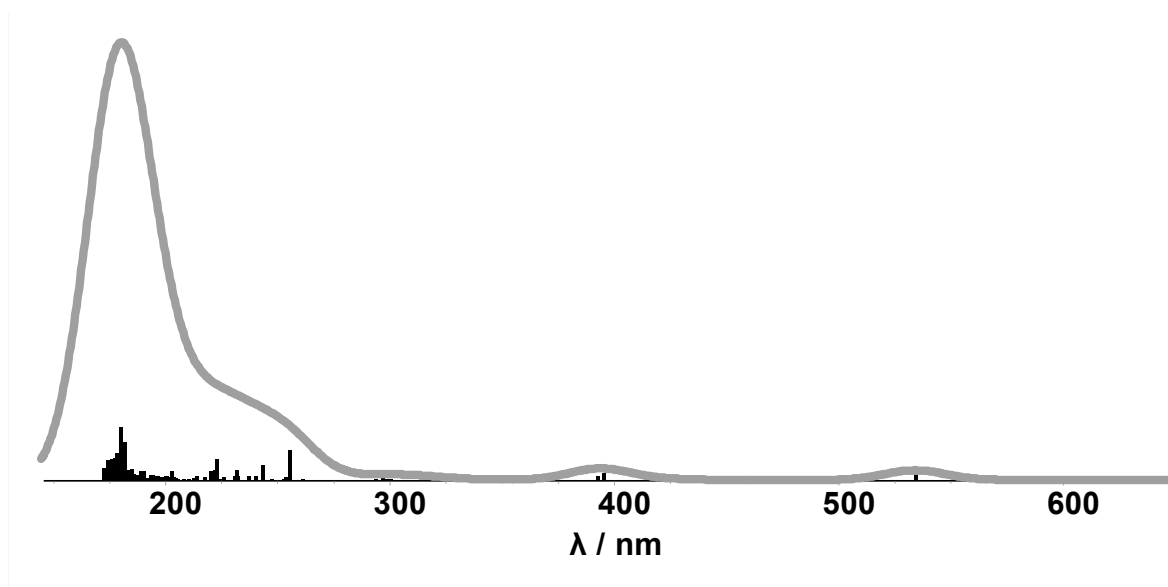

**Figure S45.** Calculated TD-DFT spectrum with discrete transitions of  $[\text{W}(\text{C-N})(\text{CO})_4]$ .

**Table S25.** Selected experimental UV/vis data of  $[\text{W}(\text{C}-\text{N})(\text{CO})_4]^-$  together with selected TD-DFT calculations.

| State | $\lambda_{\text{exp}}(\lambda_{\text{DFT}}) / \text{nm}$ | $\epsilon / 10^4 \text{ M}^{-1} \text{ cm}^{-1}(f)$ | Main contributing excitation (%)                                                                                         |
|-------|----------------------------------------------------------|-----------------------------------------------------|--------------------------------------------------------------------------------------------------------------------------|
| 1     | 1570 (1242)                                              | 0.02 (0.014)                                        | $\alpha\text{-HOMO} \rightarrow \alpha\text{-LUMO}$ (96)                                                                 |
| 3     | 1185 (927)                                               | 0.07 (0.001)                                        | $\alpha\text{-HOMO} \rightarrow \alpha\text{-LUMO}+1$ (99)                                                               |
| 4     | 947 (1022)                                               | 0.14 (0.012)                                        | $\alpha\text{-HOMO}-1 \rightarrow \alpha\text{-LUMO}+2$ (98)                                                             |
| 5     | 947 (817)                                                | 0.14 (0.006)                                        | $\alpha\text{-HOMO} \rightarrow \alpha\text{-LUMO}+3$ (99)                                                               |
| 6     | 674 (515)                                                | 0.56 (0.108)                                        | $\alpha\text{-HOMO} \rightarrow \alpha\text{-LUMO}+4$ (86)                                                               |
| 11    | 622 (454)                                                | 0.60 (0.016)                                        | $\alpha\text{-HOMO} \rightarrow \alpha\text{-LUMO}+6$ (47)<br>$\beta\text{-HOMO}-1 \rightarrow \beta\text{-LUMO}+1$ (29) |
| 13    | 575 (448)                                                | 0.44 (0.032)                                        | $\beta\text{-HOMO}-1 \rightarrow \beta\text{-LUMO}$ (68)                                                                 |
| 17    | 430 (431)                                                | 0.62 (0.015)                                        | $\beta\text{-HOMO}-2 \rightarrow \beta\text{-LUMO}$ (66)                                                                 |
| 15    | 340 (423)                                                | 1.55 (0.028)                                        | $\alpha\text{-HOMO}-1 \rightarrow \alpha\text{-LUMO}+1$ (30)<br>$\beta\text{-HOMO} \rightarrow \beta\text{-LUMO}+1$ (32) |
| 31    | 316 (380)                                                | 1.90 (0.058)                                        | $\alpha\text{-HOMO}-3 \rightarrow \alpha\text{-LUMO}$ (22)<br>$\beta\text{-HOMO}-2 \rightarrow \beta\text{-LUMO}+1$ (63) |

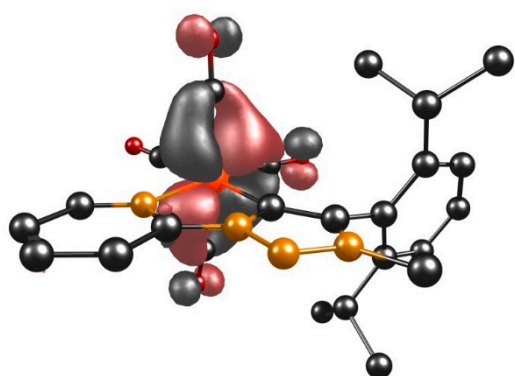

$\alpha\text{-HOMO}-3$

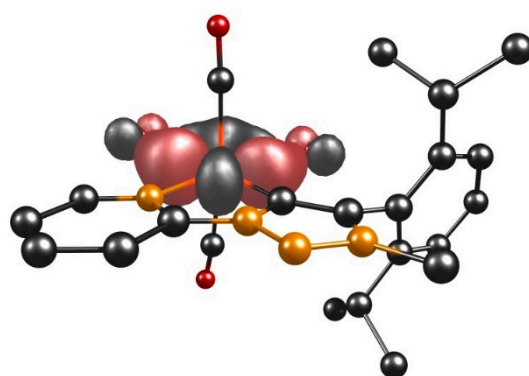

$\alpha\text{-HOMO}-1$

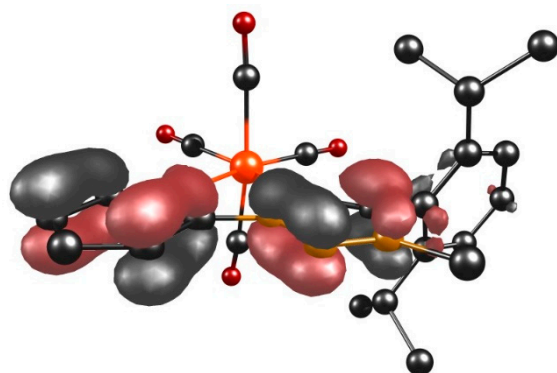

$\beta\text{-HOMO}-2$

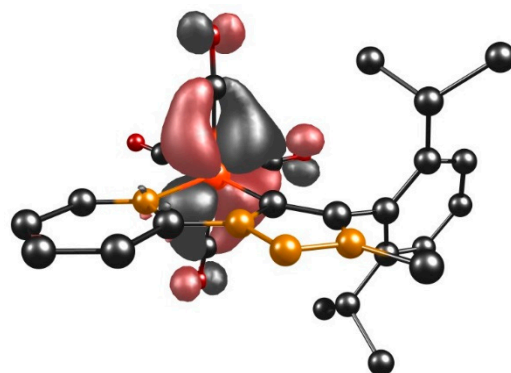

$\beta\text{-HOMO}-1$



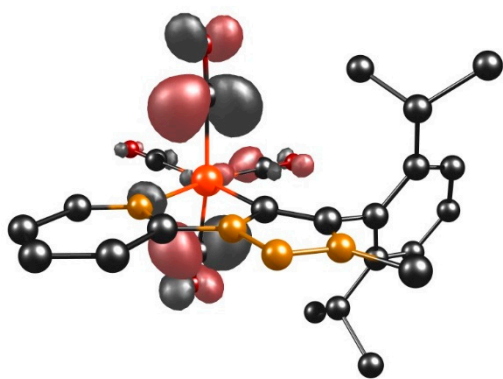 $\alpha$ -LUMO+1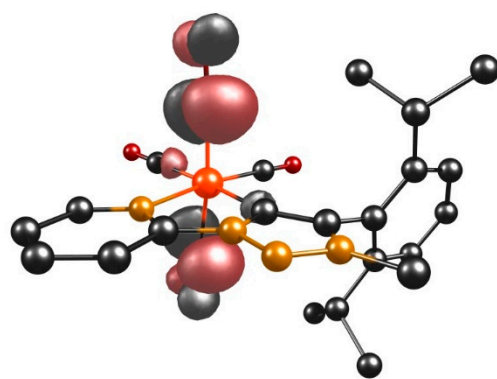 $\alpha$ -LUMO+2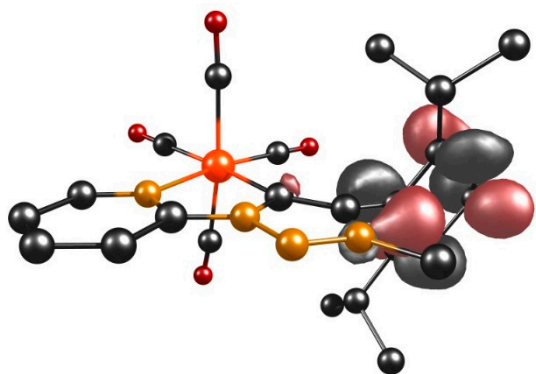 $\alpha$ -LUMO+3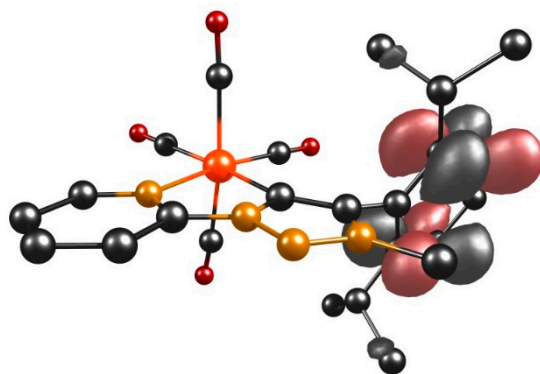 $\alpha$ -LUMO+4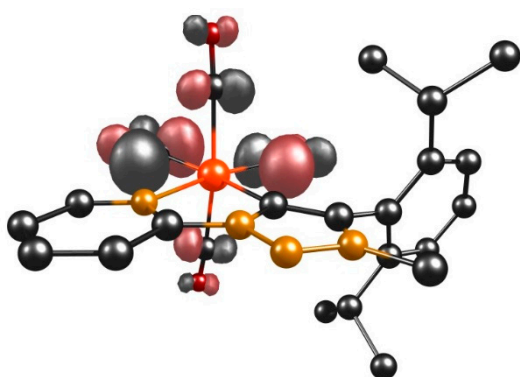 $\alpha$ -LUMO+6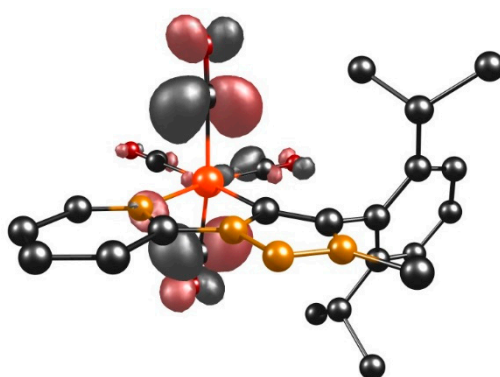 $\beta$ -LUMO+1

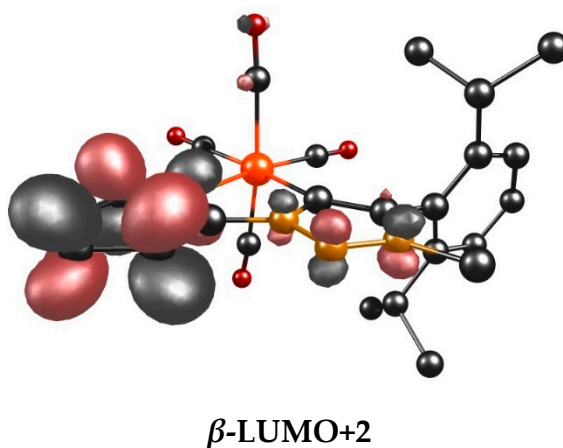

**Figure S46.** Involved TD-DFT orbitals of complex  $[\text{W}(\text{C-N})(\text{CO})_4]^-$ .

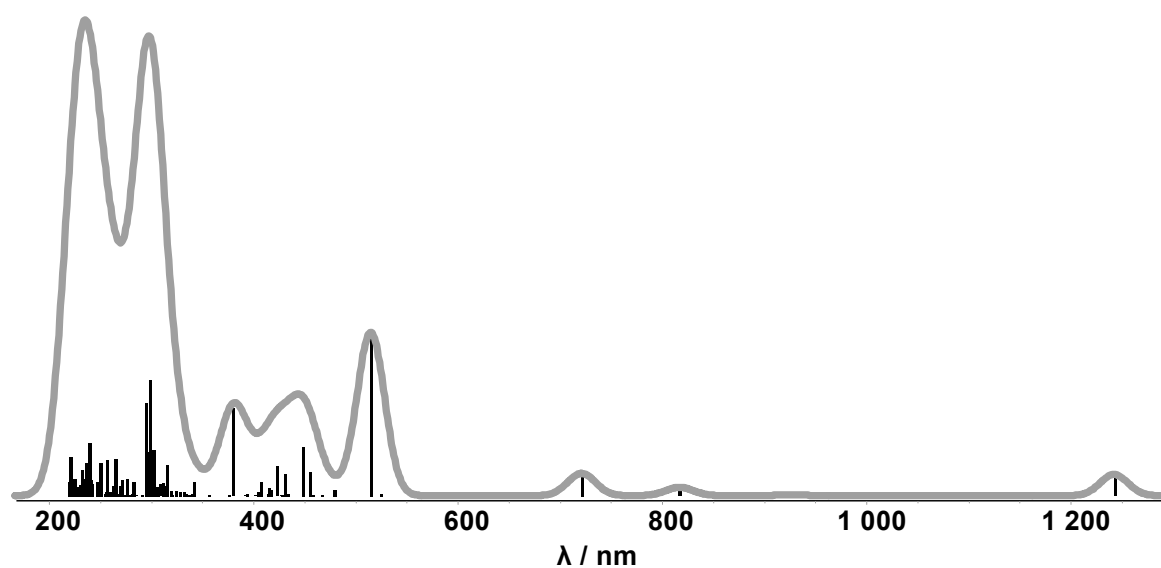

**Figure S47.** Calculated TD-DFT spectrum with discrete transitions of  $[\text{W}(\text{C-N})(\text{CO})_4]^-$ .

**Table S26.** Selected MO energies of  $[\text{W}(\text{C-N})(\text{CO})_4]$  and  $[\text{W}(\text{C-N})(\text{CO})_4]^-$ .

| $[\text{W}(\text{C-N})(\text{CO})_4]$ |             | $[\text{W}(\text{C-N})(\text{CO})_4]^-$ |             |
|---------------------------------------|-------------|-----------------------------------------|-------------|
| MO                                    | Energy / eV | MO                                      | Energy / eV |
| HOMO-2                                | -5.4114     | $\alpha$ -<br>HOMO-3                    | - 5.1212    |
| HOMO-1                                | -5.3226     | $\alpha$ -<br>HOMO-1                    | -4.8312     |
| LUMO+1                                | -1.5436     | $\beta$ -<br>HOMO-2                     | -5.0951     |
| LUMO+3                                | -0.8234     | $\beta$ -<br>HOMO-1                     | -4.8841     |
| LUMO+4                                | -0.6371     | $\alpha$ -LUMO+1                        | -0.9098     |
|                                       |             | $\alpha$ -LUMO+2                        | -0.6299     |
|                                       |             | $\alpha$ -LUMO+3                        | -0.3915     |
|                                       |             | $\alpha$ -LUMO+4                        | -0.1097     |
|                                       |             | $\alpha$ -LUMO+6                        | 0.2604      |
|                                       |             | $\beta$ -LUMO+1                         | -0.9035     |
|                                       |             | $\beta$ -LUMO+2                         | -0.7963     |

**Table S27.** XYZ coordinates of optimized [W(C–N)(CO)<sub>4</sub>].

|   | x        | y        | z        |
|---|----------|----------|----------|
| W | -2.07759 | 9.73554  | 9.61697  |
| N | -2.96761 | 7.65608  | 10.04448 |
| C | -0.50307 | 8.2197   | 9.22942  |
| C | -3.67879 | 10.84371 | 10.06891 |
| C | -1.01579 | 11.32229 | 9.11795  |
| C | -2.87022 | 9.7527   | 7.73163  |
| C | -1.5265  | 10.04743 | 11.56671 |
| C | -2.16693 | 6.58764  | 9.90972  |
| C | -4.24562 | 7.43058  | 10.39694 |
| C | 0.80693  | 8.06144  | 8.78333  |
| N | -0.86599 | 6.92263  | 9.4941   |
| O | -4.61537 | 11.48775 | 10.32662 |
| O | -0.36745 | 12.2394  | 8.80839  |
| O | -3.39567 | 9.88172  | 6.71223  |
| O | -1.28255 | 10.33587 | 12.65699 |
| C | -2.57092 | 5.28107  | 10.1267  |
| C | -4.74347 | 6.1598   | 10.6166  |
| H | -4.86981 | 8.30563  | 10.4977  |
| N | 1.07888  | 6.72162  | 8.8307   |
| C | 1.73233  | 9.07169  | 8.2307   |
| N | 0.0719   | 6.00309  | 9.26531  |
| H | -1.87158 | 4.46832  | 10.00309 |
| C | -3.89129 | 5.06731  | 10.48763 |
| H | -5.78114 | 6.03457  | 10.89117 |
| C | 2.32432  | 6.051    | 8.47017  |
| C | 2.79535  | 9.57707  | 9.00607  |
| C | 1.50774  | 9.52366  | 6.91752  |
| H | -4.25204 | 4.06282  | 10.66178 |
| H | 2.10445  | 5.24863  | 7.77093  |
| H | 2.78762  | 5.64725  | 9.36801  |
| H | 2.97747  | 6.7847   | 8.0094   |
| C | 3.62014  | 10.54744 | 8.44257  |
| C | 3.00999  | 9.10062  | 10.43458 |
| C | 2.36207  | 10.49259 | 6.39344  |
| C | 0.40982  | 8.93538  | 6.05046  |
| H | 4.44153  | 10.95367 | 9.0149   |
| C | 3.40765  | 11.0012  | 7.14635  |
| H | 2.8103   | 8.02583  | 10.45686 |
| C | 2.00226  | 9.76379  | 11.38238 |
| C | 4.43763  | 9.30153  | 10.9483  |
| H | 2.21181  | 10.84743 | 5.3825   |
| H | -0.30392 | 8.43384  | 6.70358  |
| C | 0.99207  | 7.87157  | 5.10882  |
| C | -0.36411 | 9.99906  | 5.26801  |
| H | 4.06438  | 11.75135 | 6.72312  |
| H | 2.16235  | 10.84424 | 11.41442 |
| H | 2.11407  | 9.36649  | 12.39356 |
| H | 0.98043  | 9.58626  | 11.05581 |
| H | 5.17605  | 8.86949  | 10.27082 |
| H | 4.5453   | 8.82094  | 11.92218 |
| H | 4.67254  | 10.36024 | 11.0773  |
| H | 0.1962   | 7.39736  | 4.52941  |
| H | 1.51846  | 7.09405  | 5.66658  |
| H | 1.70213  | 8.32369  | 4.41236  |
| H | 0.26267  | 10.48049 | 4.51497  |
| H | -0.75154 | 10.77088 | 5.93338  |
| H | -1.20875 | 9.53797  | 4.75346  |

**Table S28.** XYZ coordinates of optimized  $[\text{W}(\text{C}-\text{N})(\text{CO})_4]^-$ .

|   | x        | y        | z        |
|---|----------|----------|----------|
| W | -2.06786 | 9.72788  | 9.63463  |
| N | -2.97596 | 7.67083  | 10.04528 |
| C | -0.48365 | 8.21092  | 9.23315  |
| C | -3.64508 | 10.84533 | 10.11098 |
| C | -0.99324 | 11.30386 | 9.13403  |
| C | -2.88509 | 9.76388  | 7.76288  |
| C | -1.53083 | 10.02029 | 11.58842 |
| C | -2.14669 | 6.58813  | 9.9007   |
| C | -4.25432 | 7.43495  | 10.38142 |
| C | 0.79969  | 8.0526   | 8.78569  |
| N | -0.88101 | 6.89132  | 9.50839  |
| O | -4.56877 | 11.5093  | 10.3946  |
| O | -0.33876 | 12.22052 | 8.81907  |
| O | -3.43778 | 9.91139  | 6.75557  |
| O | -1.31435 | 10.31458 | 12.6876  |
| C | -2.59346 | 5.26842  | 10.11902 |
| C | -4.77164 | 6.17214  | 10.58956 |
| H | -4.87674 | 8.31371  | 10.48207 |
| N | 1.10927  | 6.70498  | 8.80651  |
| C | 1.72091  | 9.06841  | 8.22967  |
| N | 0.08353  | 5.94564  | 9.27448  |
| H | -1.90044 | 4.4488   | 10.00145 |
| C | -3.90743 | 5.06597  | 10.46101 |
| H | -5.812   | 6.05176  | 10.85551 |
| C | 2.35543  | 6.05673  | 8.4784   |
| C | 2.78051  | 9.58273  | 9.00405  |
| C | 1.51676  | 9.50926  | 6.90949  |
| H | -4.27689 | 4.06202  | 10.6277  |
| H | 2.19057  | 5.27244  | 7.73759  |
| H | 2.80791  | 5.61295  | 9.36883  |
| H | 3.03014  | 6.80188  | 8.06607  |
| C | 3.61523  | 10.54578 | 8.44067  |
| C | 2.98035  | 9.1201   | 10.43898 |
| C | 2.37823  | 10.47111 | 6.38143  |
| C | 0.42104  | 8.92096  | 6.03996  |
| H | 4.43227  | 10.95543 | 9.01778  |
| C | 3.41849  | 10.98705 | 7.13726  |
| H | 2.7373   | 8.05512  | 10.47279 |
| C | 1.99589  | 9.83107  | 11.37616 |
| C | 4.41474  | 9.27649  | 10.94915 |
| H | 2.23786  | 10.81517 | 5.36469  |
| H | -0.27242 | 8.39879  | 6.6979   |
| C | 1.00689  | 7.88611  | 5.0694   |
| C | -0.37824 | 9.99061  | 5.29175  |
| H | 4.08171  | 11.73077 | 6.71199  |
| H | 2.19646  | 10.90551 | 11.39812 |
| H | 2.08994  | 9.44178  | 12.39298 |
| H | 0.97196  | 9.683    | 11.04179 |
| H | 5.1366   | 8.80672  | 10.27835 |
| H | 4.50764  | 8.80798  | 11.93088 |
| H | 4.69024  | 10.32752 | 11.06085 |
| H | 0.21223  | 7.41289  | 4.48661  |
| H | 1.54693  | 7.10518  | 5.60924  |
| H | 1.70484  | 8.35998  | 4.37434  |
| H | 0.23309  | 10.50368 | 4.54598  |
| H | -0.77143 | 10.7368  | 5.98239  |
| H | -1.22143 | 9.5309   | 4.77275  |

S7. Electrochemical CO<sub>2</sub> ReductionS7.10 Electrochemical CO<sub>2</sub> Reduction with [Cr(C–C)(CO)<sub>4</sub>]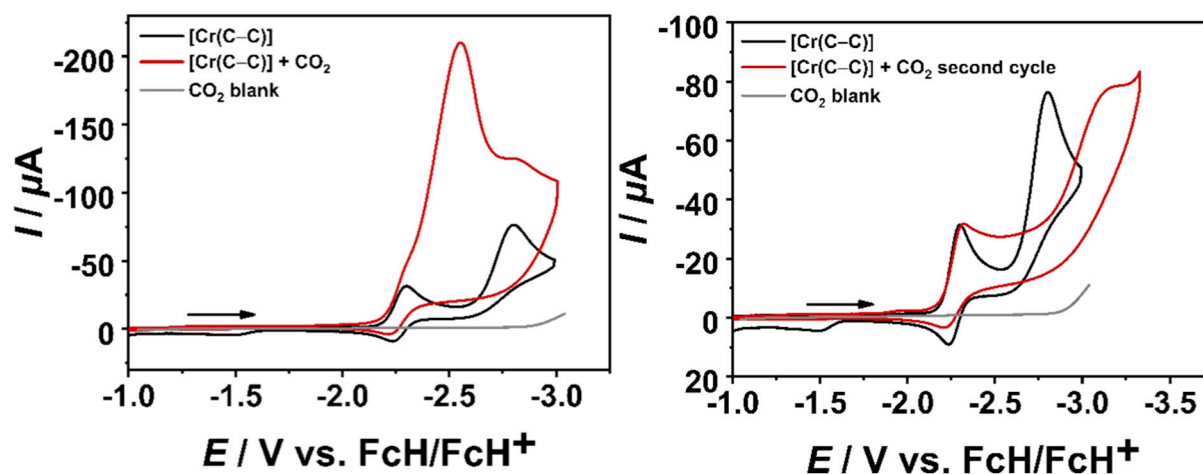

**Figure S48.** Cyclic voltammograms of [Cr(C–C)(CO)<sub>4</sub>] (1 mM, black) and in the presence of CO<sub>2</sub> (red) at 100 mV/s in CH<sub>3</sub>CN/0.1 M Bu<sub>4</sub>NPF<sub>6</sub> with a GC working electrode (left: first cycle, right: second cycle).

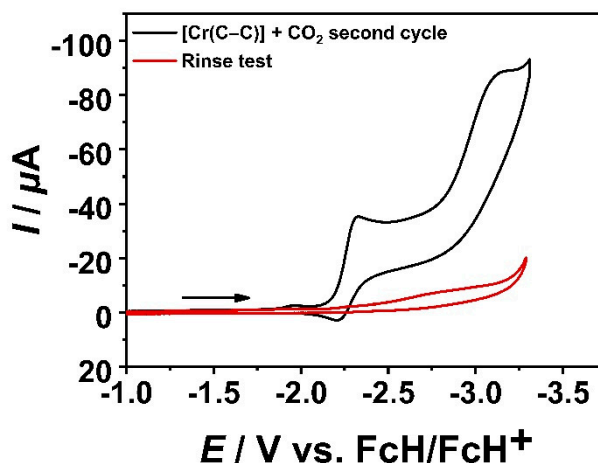

**Figure S49.** Rinse test of [Cr(C–C)(CO)<sub>4</sub>] (1 mM, black, second cycle) and freshly prepared saturated CO<sub>2</sub> solution (red) at 100 mV/s in CH<sub>3</sub>CN/0.1 M Bu<sub>4</sub>NPF<sub>6</sub> with a GC working electrode.

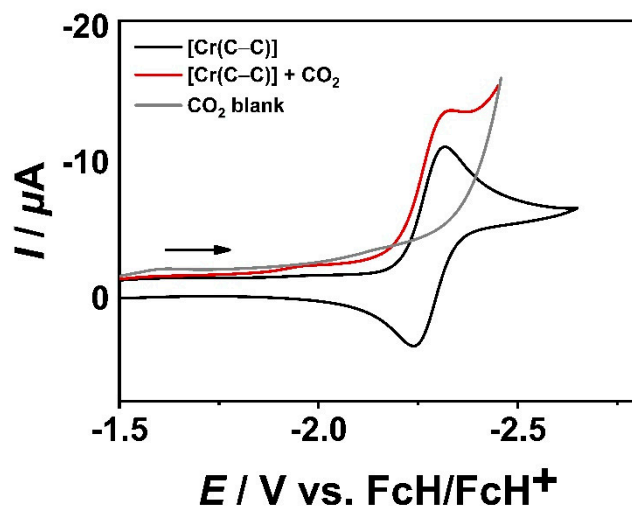

**Figure S50.** Cyclic voltammograms of  $[\text{Cr}(\text{C-C})(\text{CO})_4]$  (1 mM, black) and in the presence of  $\text{CO}_2$  (red) at 100 mV/s in  $\text{CH}_3\text{CN}/0.1 \text{ M Bu}_4\text{NPF}_6$  with a Au working electrode.

#### S7.20 Electrochemical $\text{CO}_2$ Reduction with $[\text{Cr}(\text{C-N})(\text{CO})_4]$

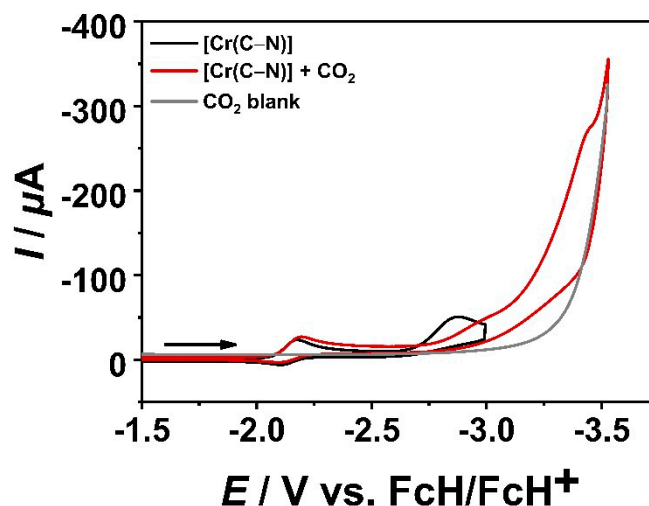

**Figure S51.** Cyclic voltammograms of  $[\text{Cr}(\text{C-N})(\text{CO})_4]$  (1 mM, black) and in the presence of  $\text{CO}_2$  (red) at 100 mV/s in  $\text{CH}_3\text{CN}/0.1 \text{ M Bu}_4\text{NPF}_6$  with a GC working.

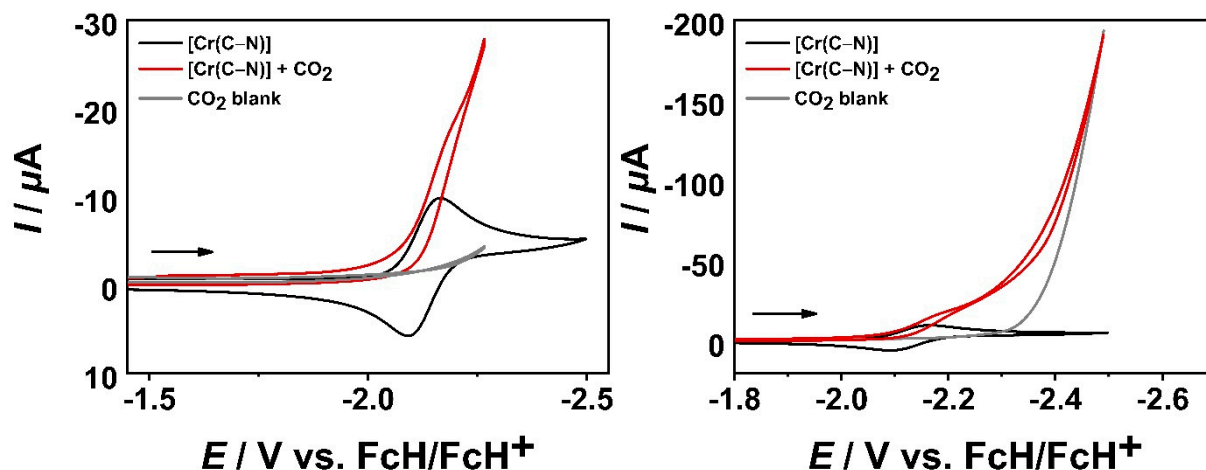

**Figure S52.** Cyclic voltammograms of  $[\text{Cr}(\text{C-N})(\text{CO})_4]$  (1 mM, black) and in the presence of  $\text{CO}_2$  (red) at 100 mV/s in  $\text{CH}_3\text{CN}/0.1 \text{ M Bu}_4\text{NPF}_6$  with a Au working electrode.

#### S7.30 Electrochemical $\text{CO}_2$ Reduction with $[\text{Mo}(\text{C-C})(\text{CO})_4]$

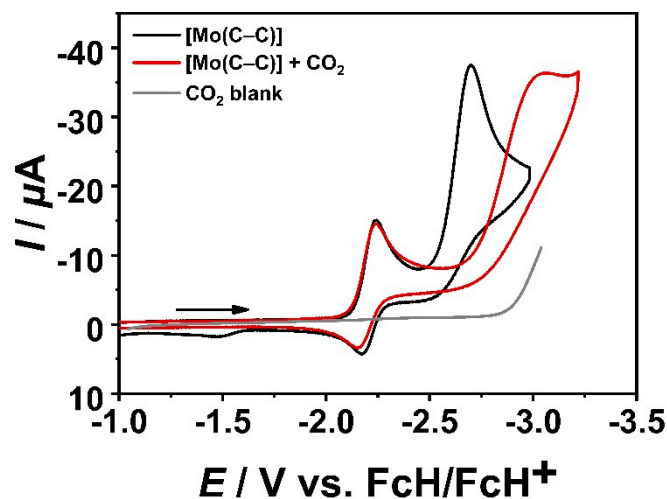

**Figure S53.** Cyclic voltammograms of  $[\text{Mo}(\text{C-C})(\text{CO})_4]$  (1 mM, black) and in the presence of  $\text{CO}_2$  (red) at 100 mV/s in  $\text{CH}_3\text{CN}/0.1 \text{ M Bu}_4\text{NPF}_6$  with a GC working.



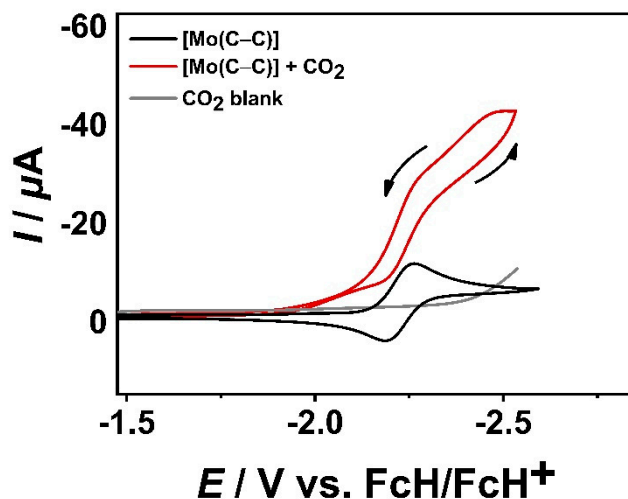

**Figure S54.** Cyclic voltammograms of [Mo(C-C)(CO)<sub>4</sub>] (1 mM, black) and in the presence of CO<sub>2</sub> (red) at 100 mV/s in CH<sub>3</sub>CN/0.1 M Bu<sub>4</sub>NPF<sub>6</sub> with a Au working electrode.

#### S7.40 Electrochemical CO<sub>2</sub> Reduction with [Mo(C-N)(CO)<sub>4</sub>]

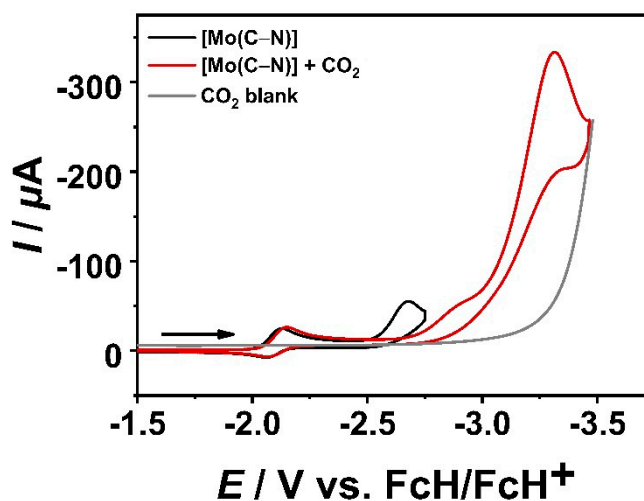

**Figure S55.** Cyclic voltammograms of [Mo(C-N)(CO)<sub>4</sub>] (1 mM, black) and in the presence of CO<sub>2</sub> (red) at 100 mV/s in CH<sub>3</sub>CN/0.1 M Bu<sub>4</sub>NPF<sub>6</sub> with a GC working.

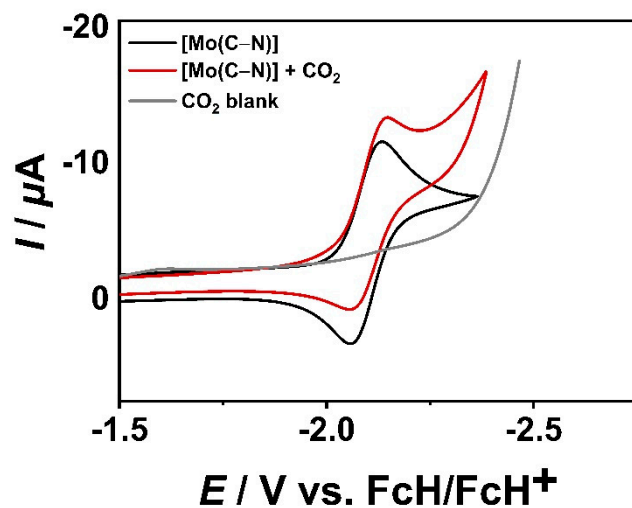

**Figure S56.** Cyclic voltammograms of  $[\text{Mo}(\text{C-N})(\text{CO})_4]$  (1 mM, black) and in the presence of  $\text{CO}_2$  (red) at 100 mV/s in  $\text{CH}_3\text{CN}/0.1 \text{ M Bu}_4\text{NPF}_6$  with a Au working electrode.
